# Supplementary material for: Pathways to Sustainable Aviation: Aligning Flight Plans with Climate Goals
Source: Research Square preprint supplement (doi:10.21203/rs.3.rs-4355046/v1), 2024-06-04

Climate-sensitivity to H<sub>2</sub>O emissions & selected flight levels with different routing options

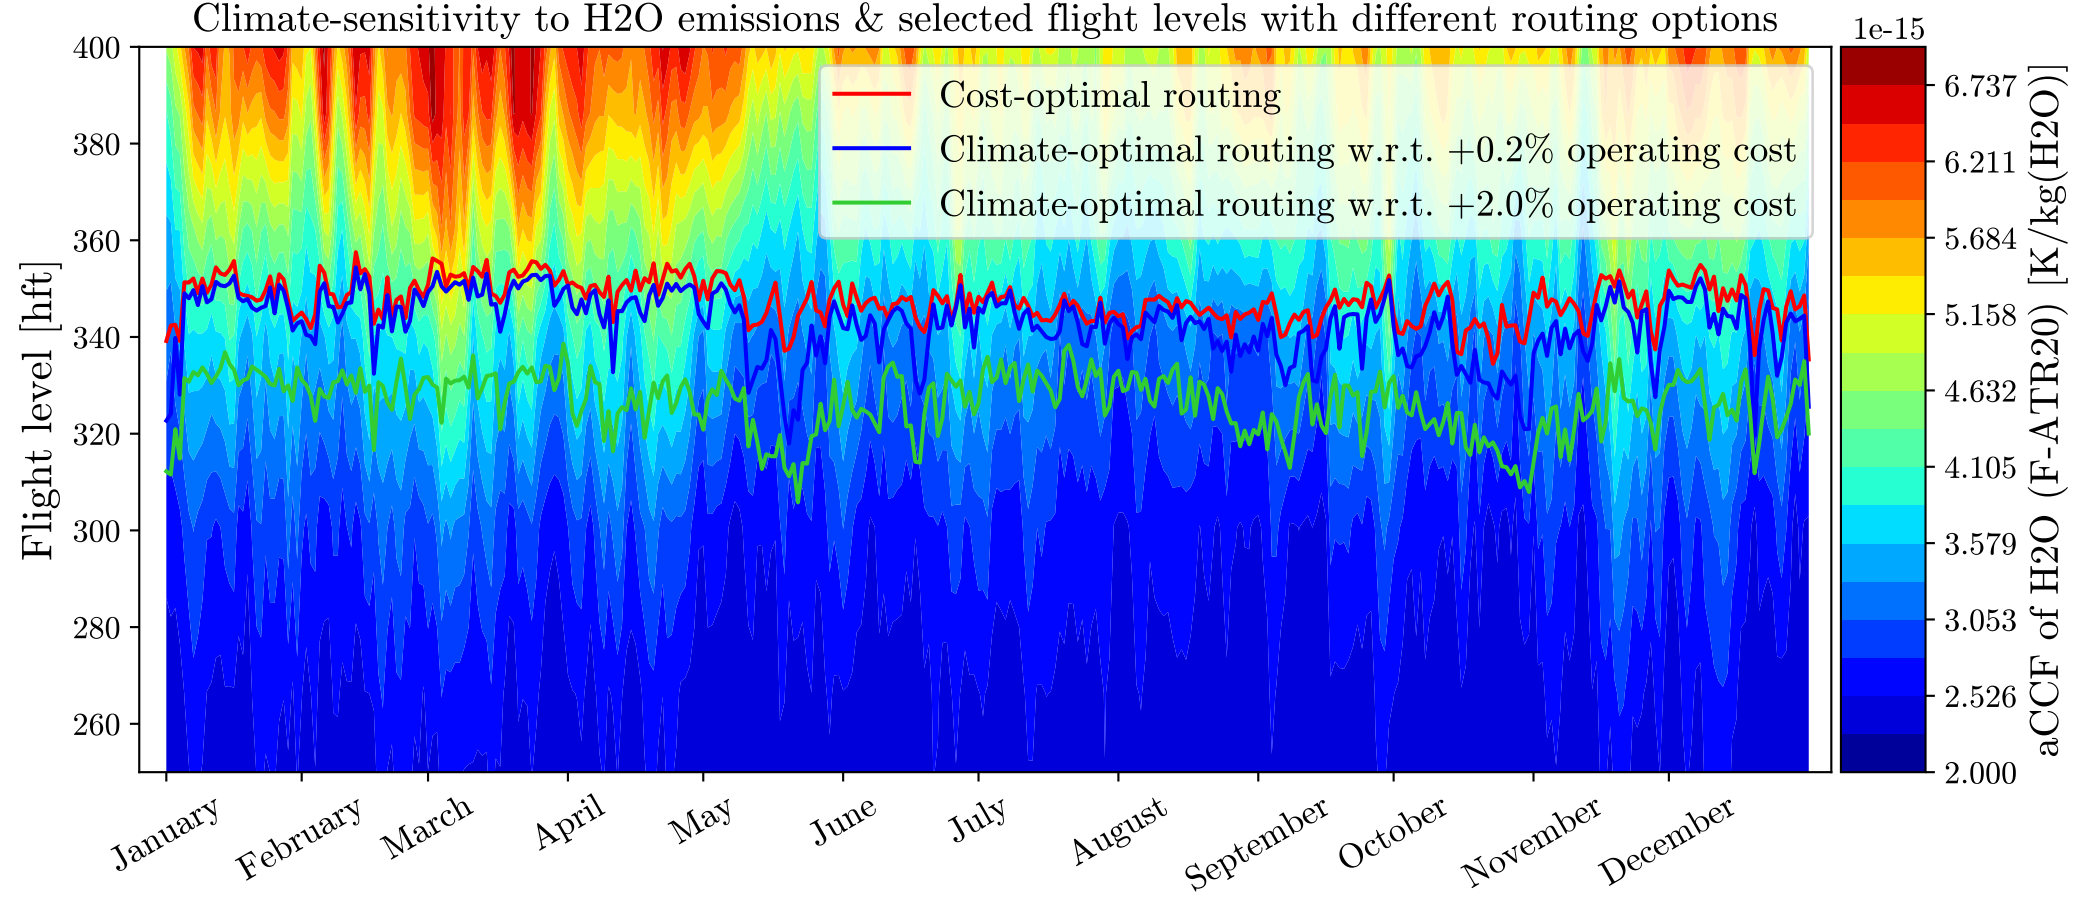

Supplement: Supplementary file 34 [file H2OvsFL_2.pdf › plots_up_to_3.0%_SOC_unrestricted_rerouting/H2OvsFL_2.pdf]
