# Supplementary material for: Pathways to Sustainable Aviation: Aligning Flight Plans with Climate Goals
Source: Research Square preprint supplement (doi:10.21203/rs.3.rs-4355046/v1), 2024-06-04

Climate-sensitivity to NO<sub>x</sub> emissions & selected flight levels with different routing options

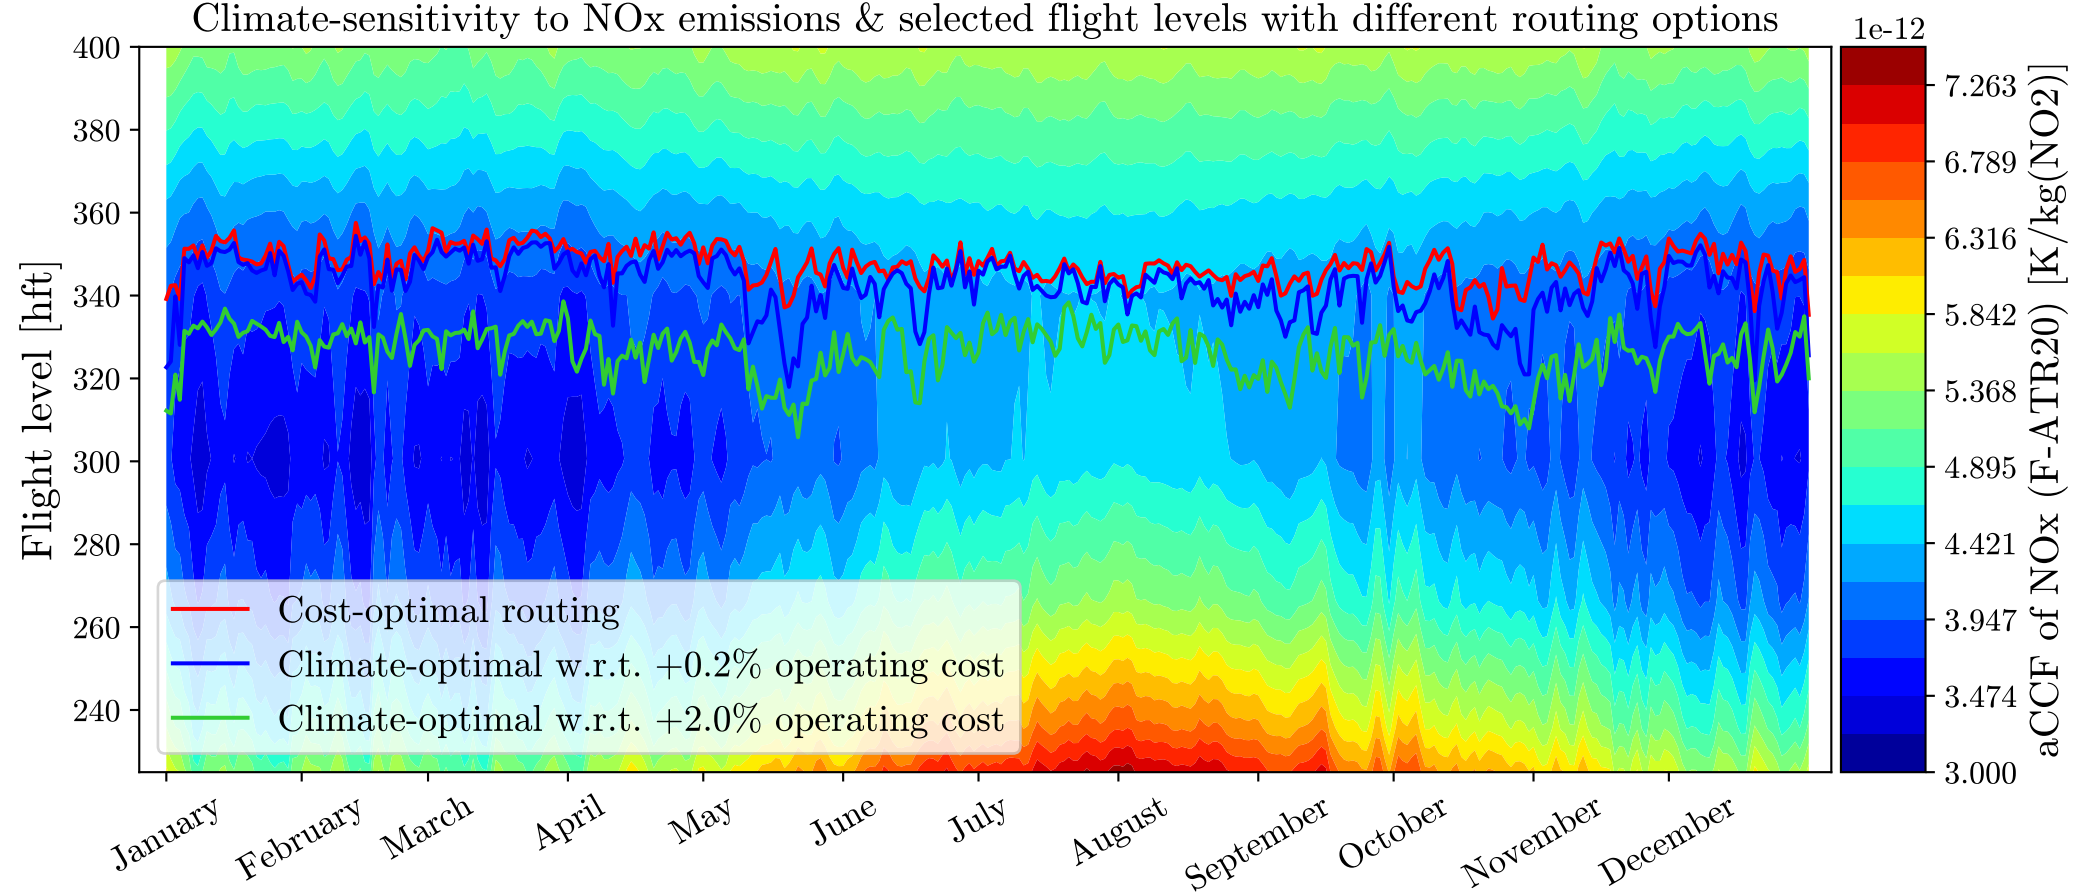

Supplement: Supplementary file 35 [file NOxvsFL_2.pdf › plots_up_to_3.0%_SOC_unrestricted_rerouting/NOxvsFL_2.pdf]
