# Supplementary figures and images for: Pathways to Sustainable Aviation: Aligning Flight Plans with Climate Goals
Source: Research Square preprint supplement (doi:10.21203/rs.3.rs-4355046/v1), 2024-06-04

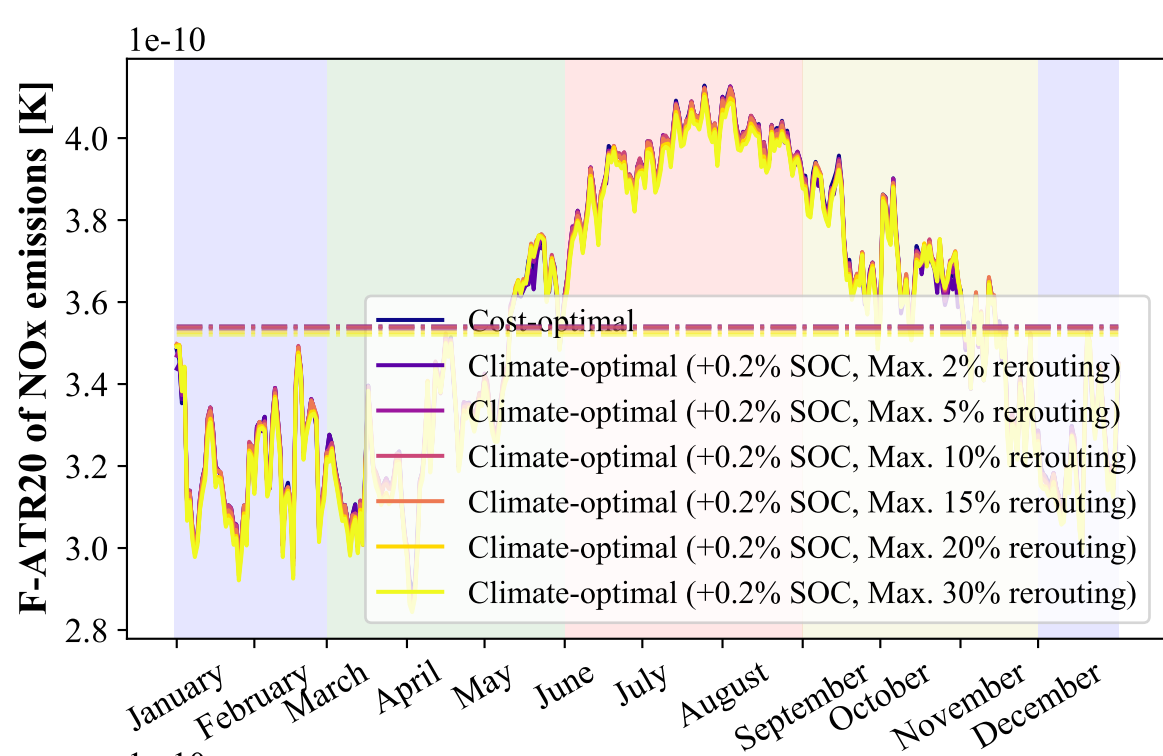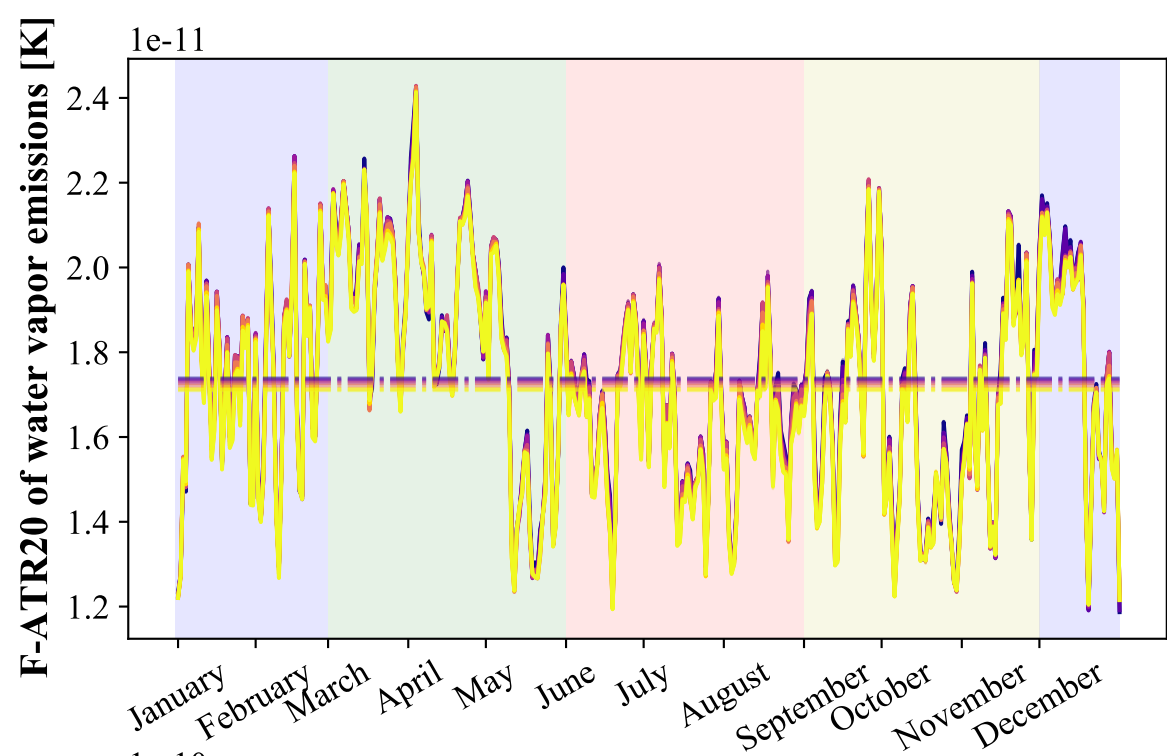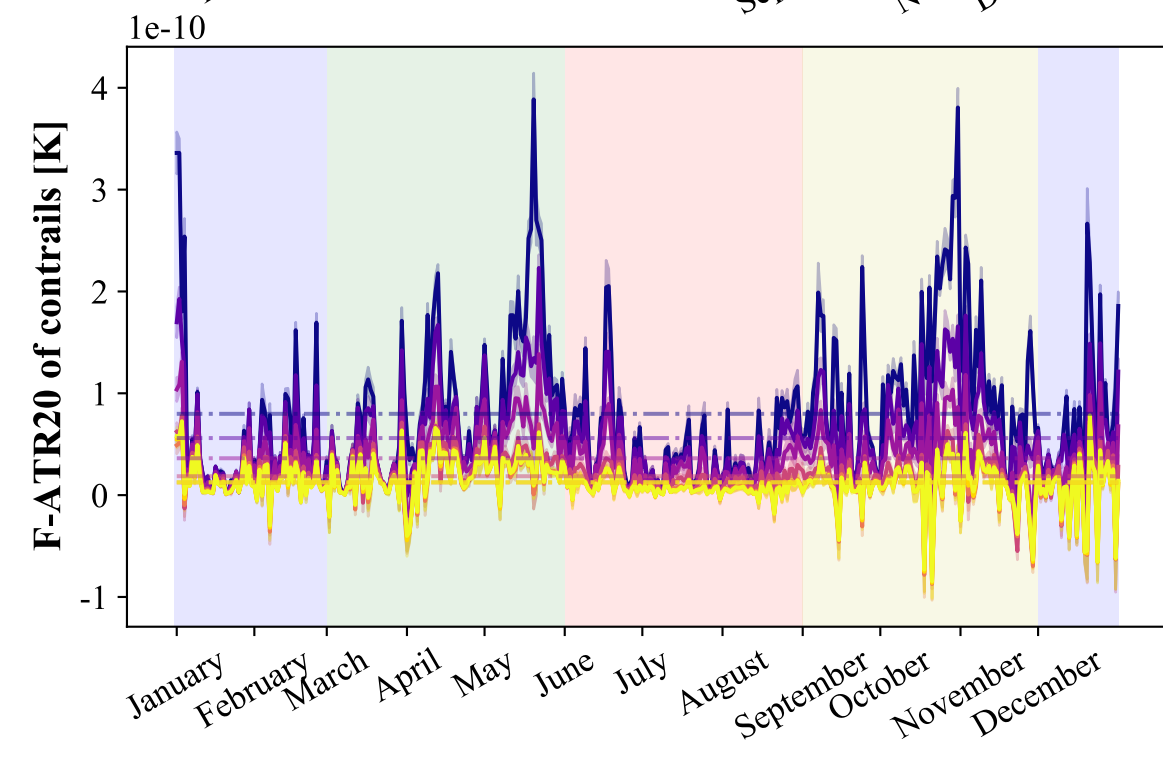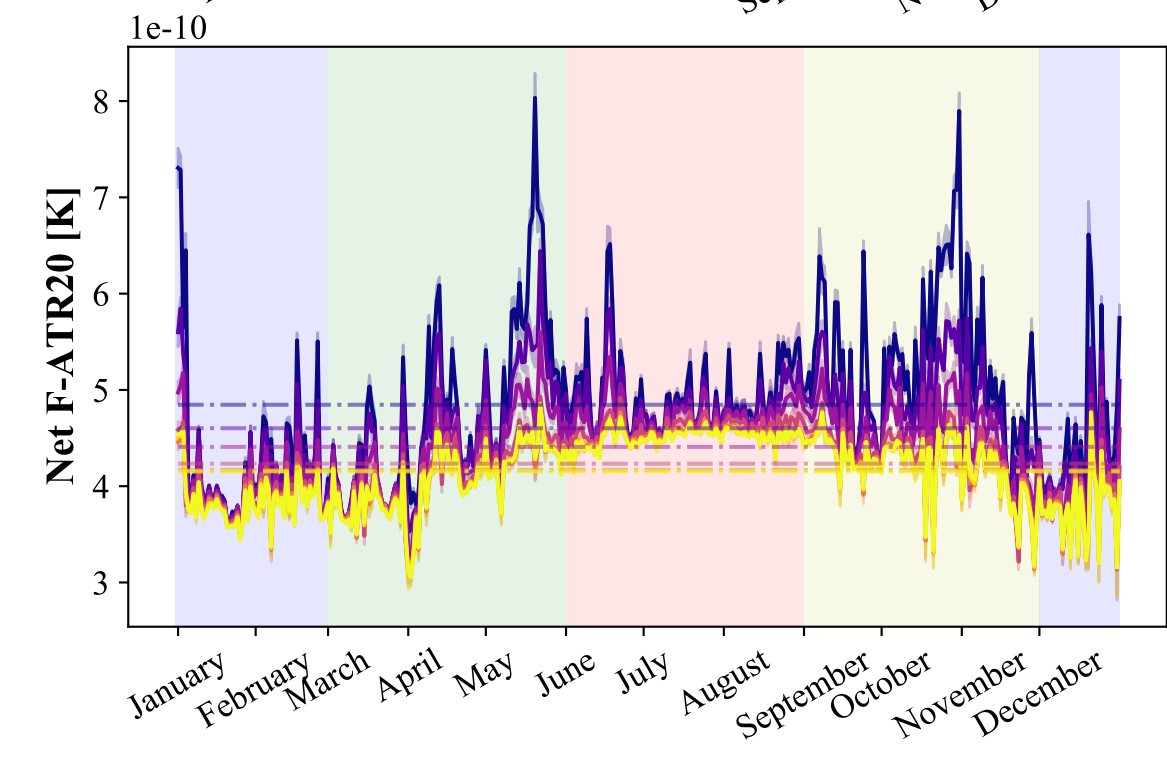

Supplement: Supplementary file 1 [file climate_new.pdf › plots_0.2%_SOC_different_rerouting_limits/climate_new.pdf]

### Departure at 0000 UTC

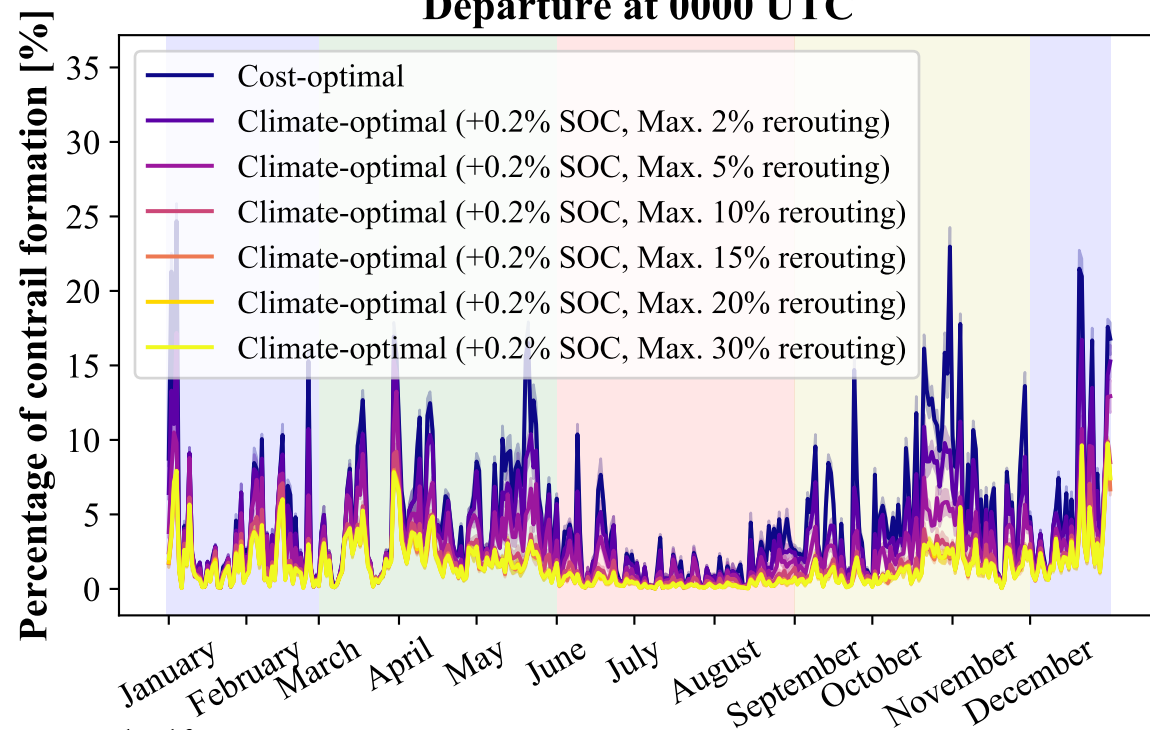

### Departure at 1200 UTC

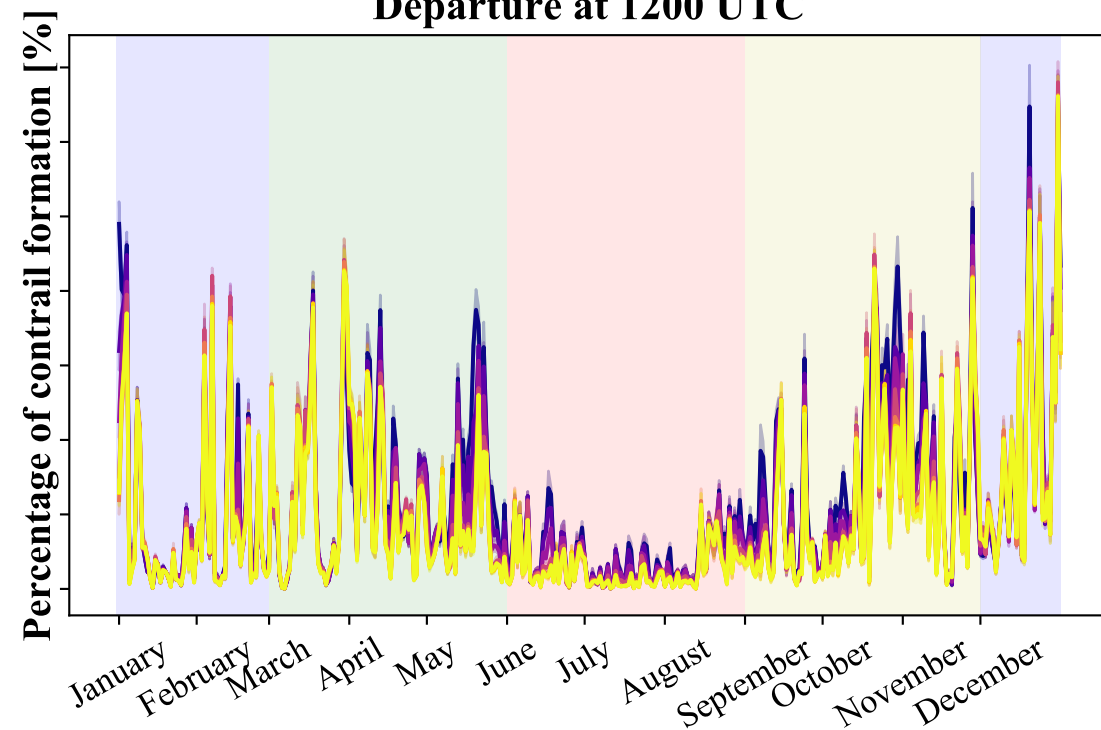

### F-ATR20 of contrails [K]

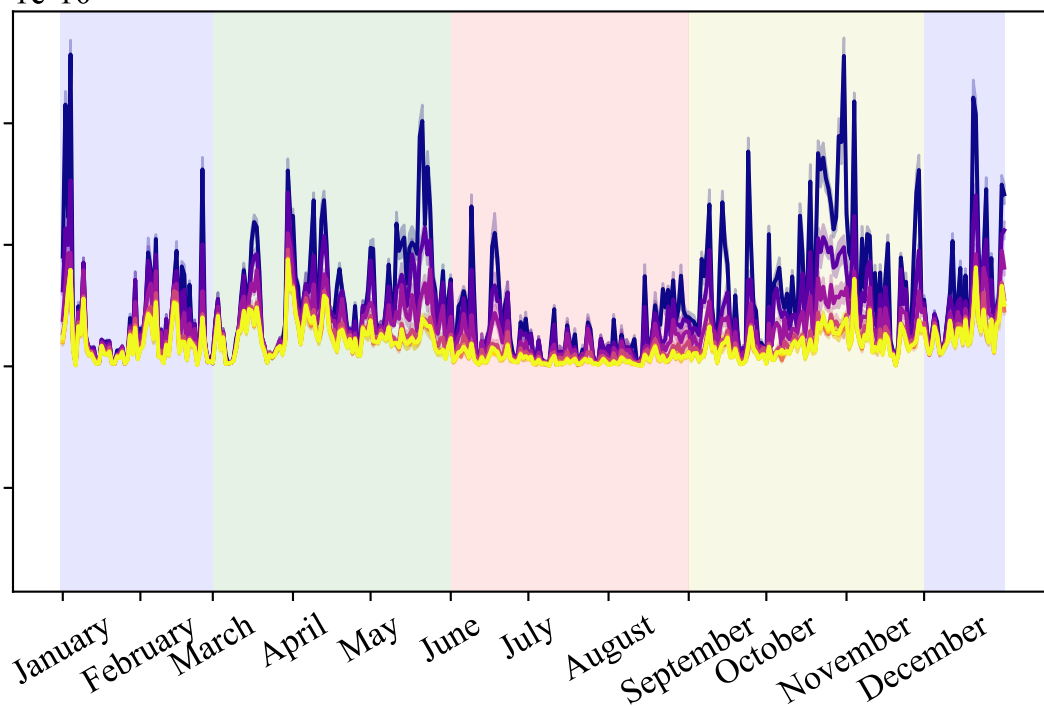

### F-ATR20 of contrails [K]

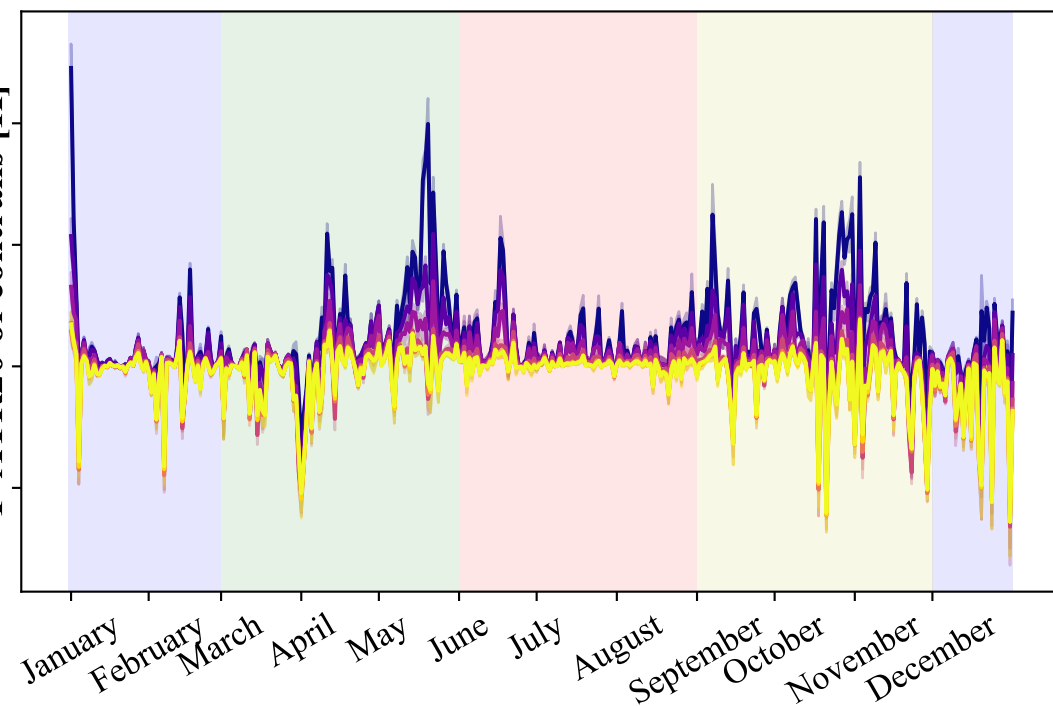

Supplement: Supplementary file 2 [file contrail.pdf › plots_0.2%_SOC_different_rerouting_limits/contrail.pdf]

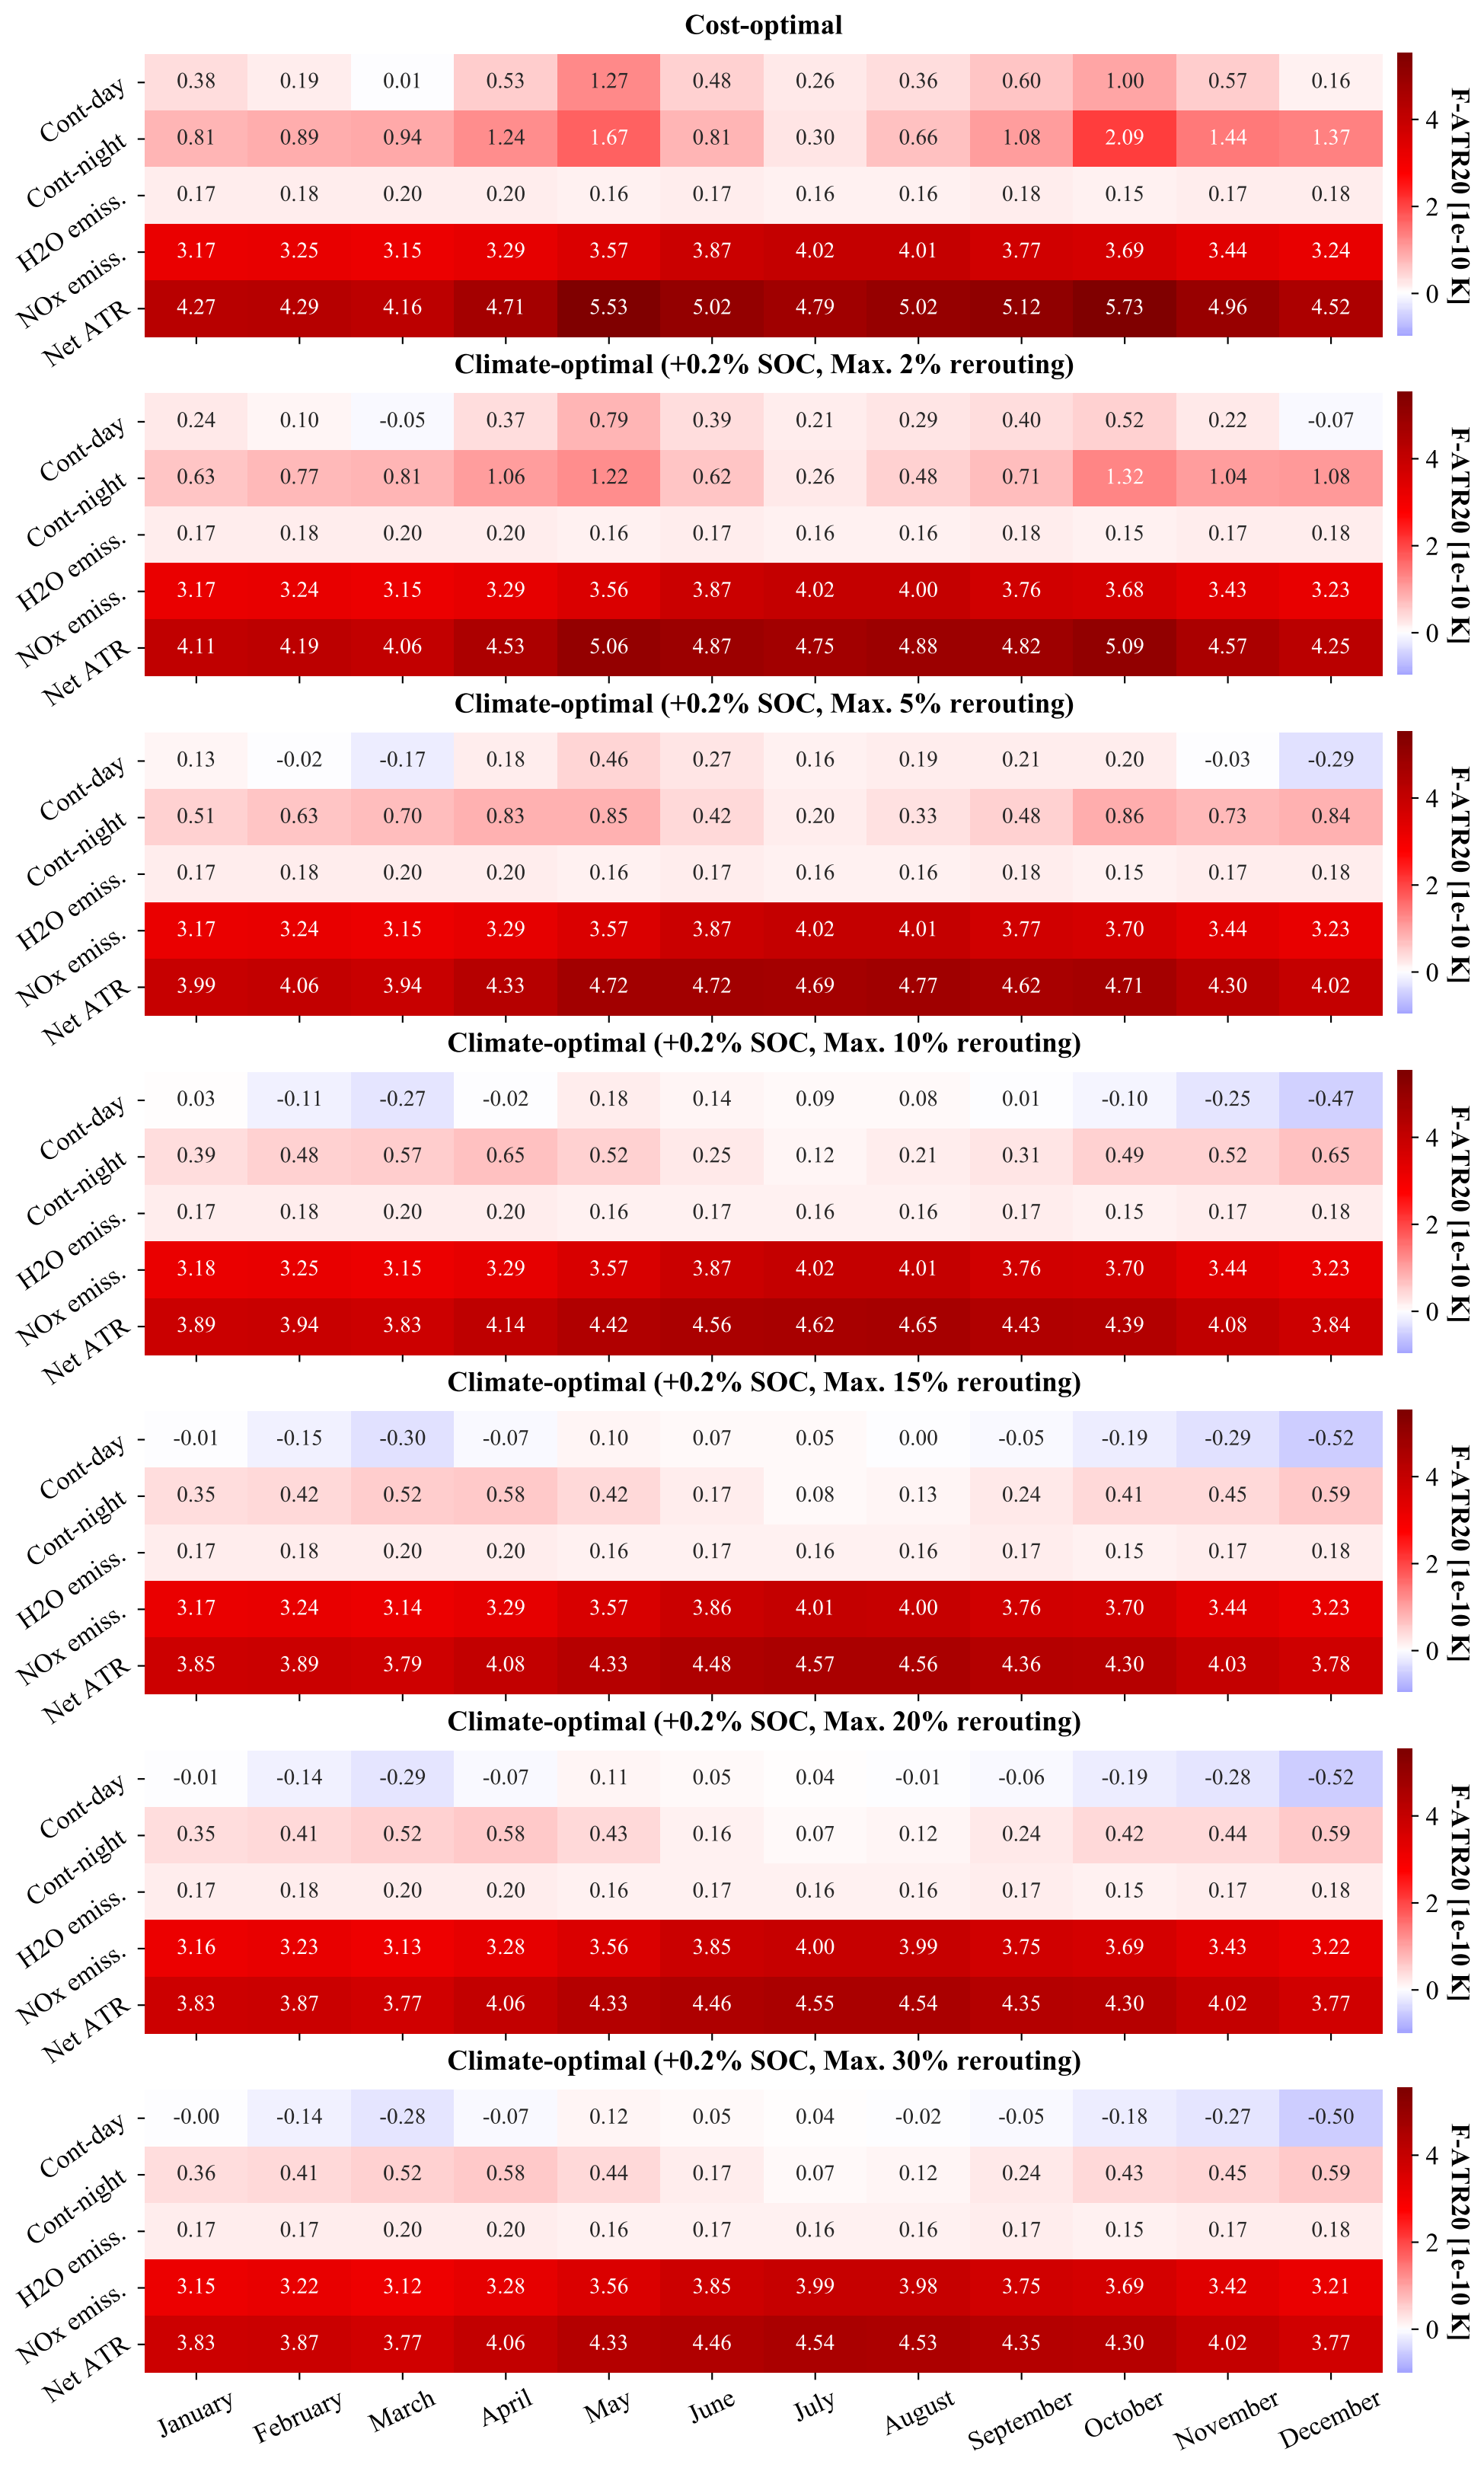

Supplement: Supplementary file 3 [file cost_opt.pdf › plots_0.2%_SOC_different_rerouting_limits/cost_opt.pdf]

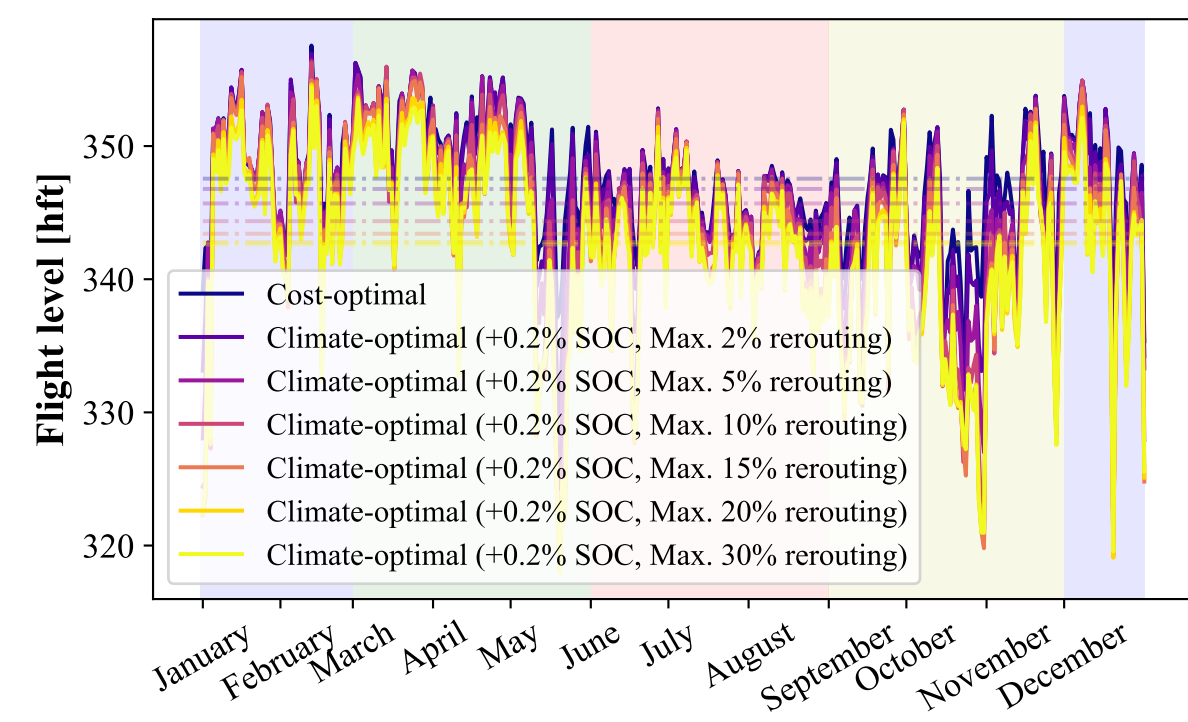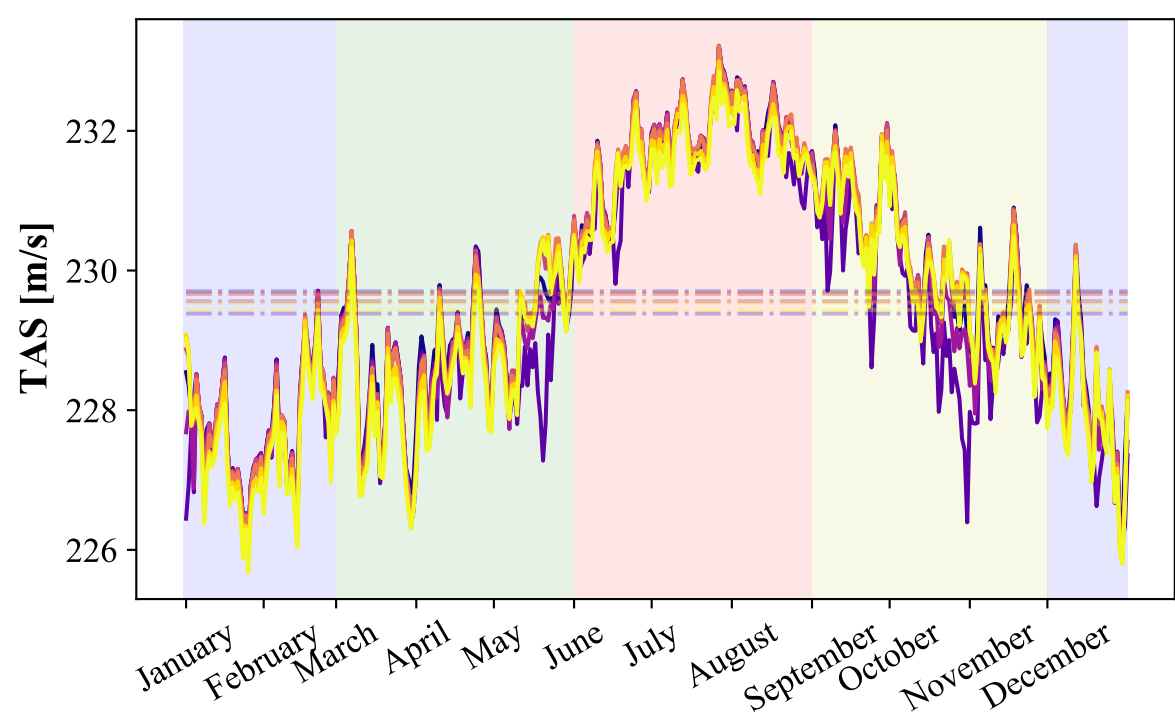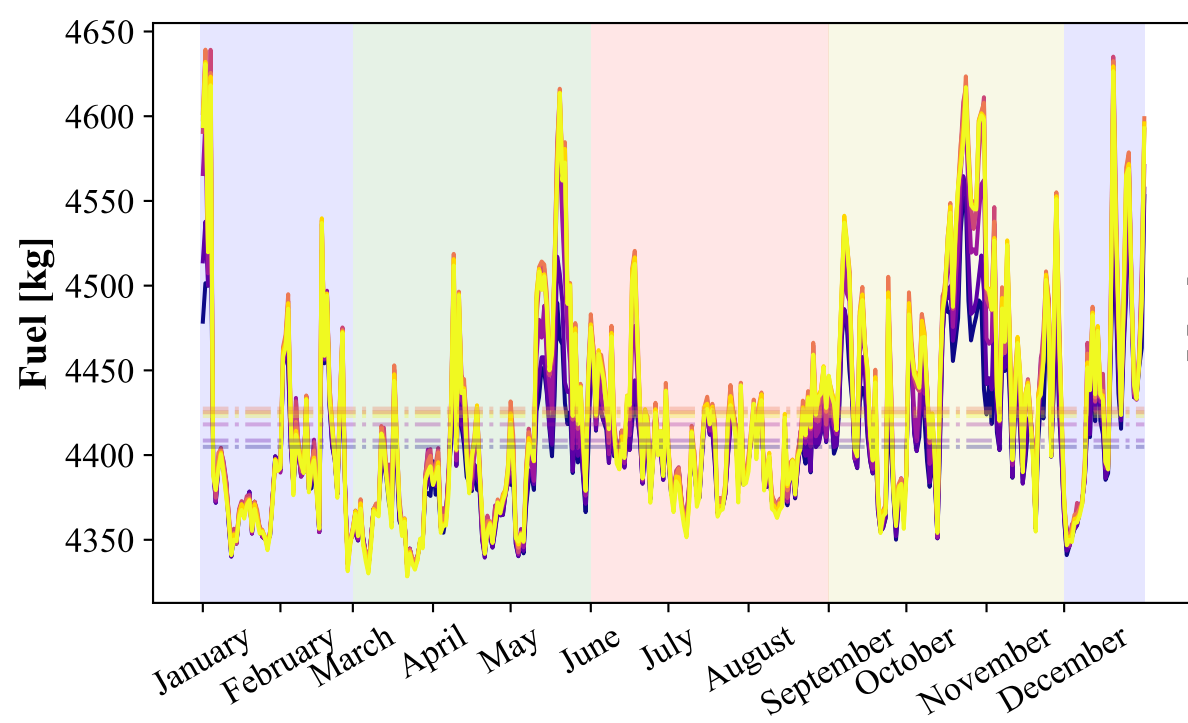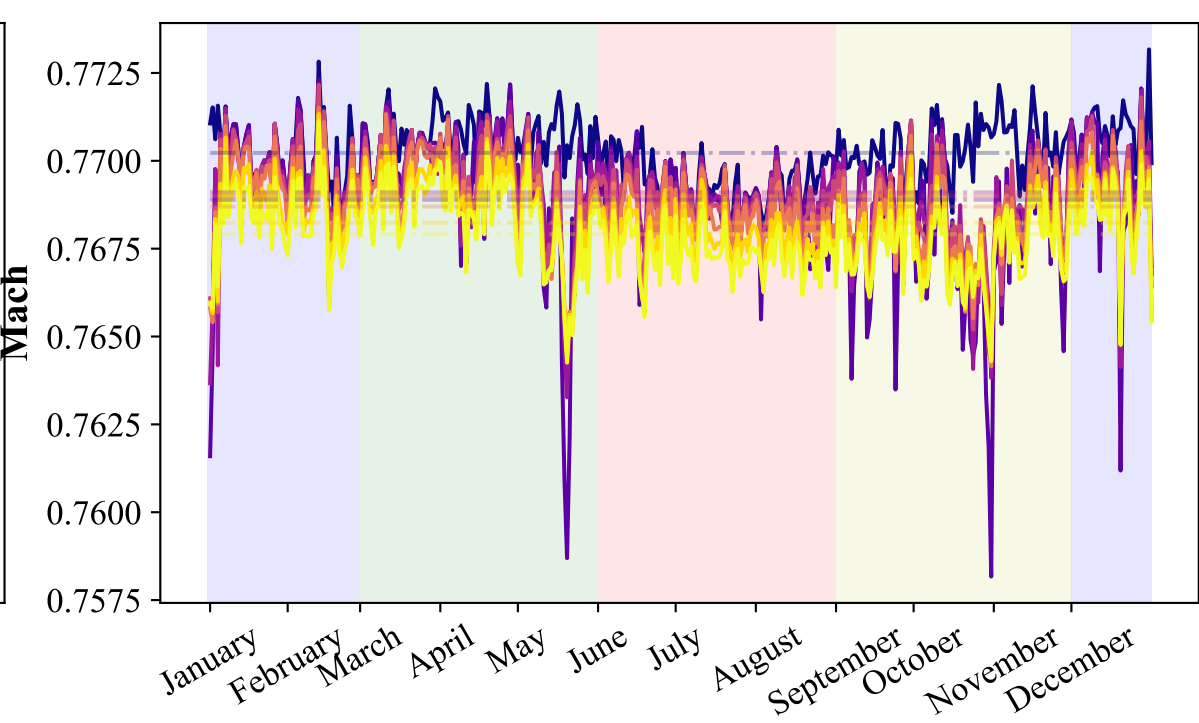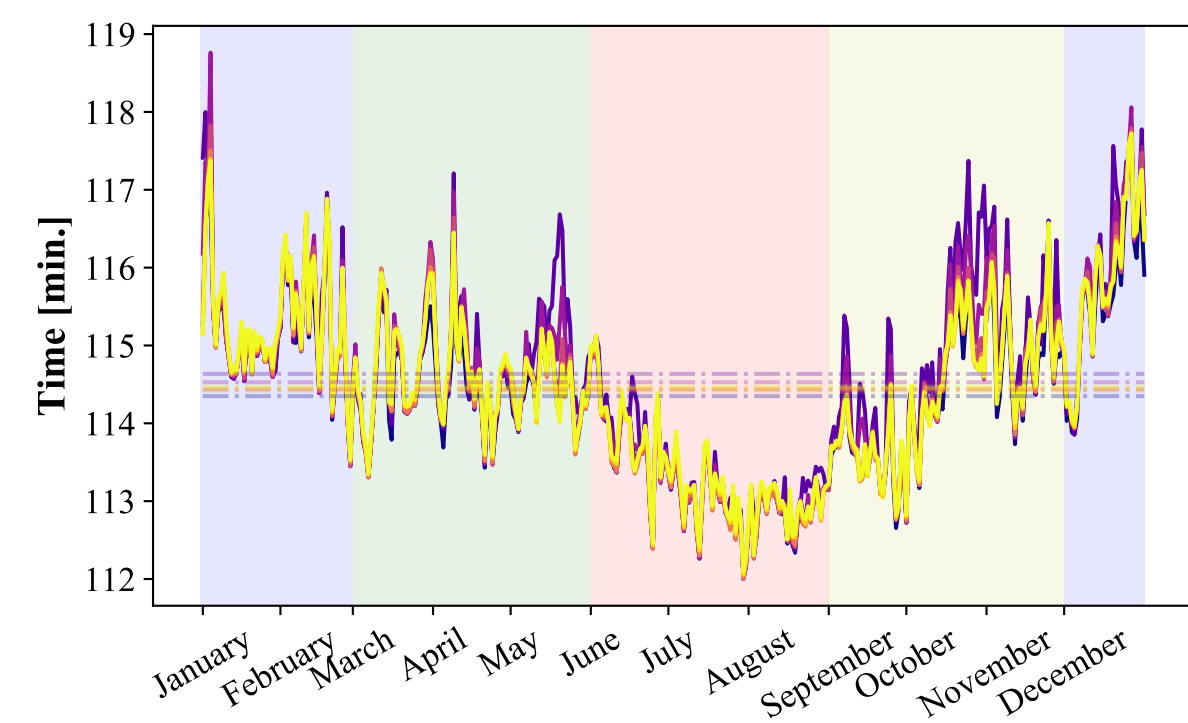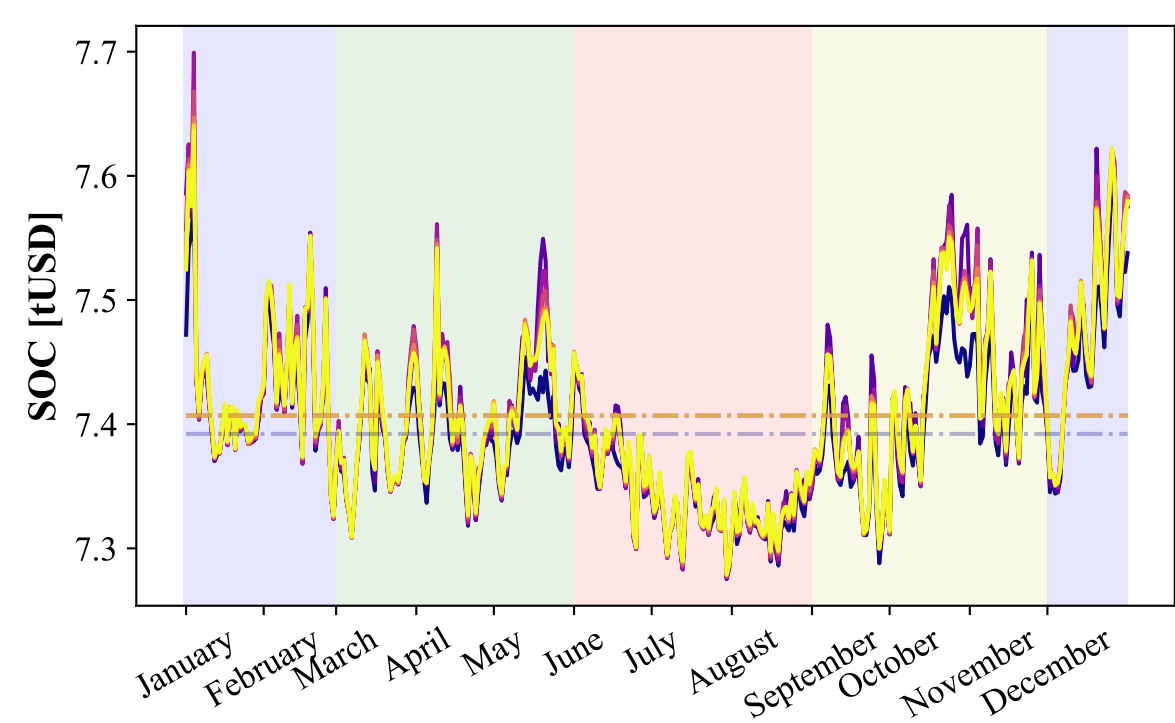

Supplement: Supplementary file 4 [file cost_related_3.pdf › plots_0.2%_SOC_different_rerouting_limits/cost_related_3.pdf]

**Percentage of flights deviated from cost-optimal trajectories**

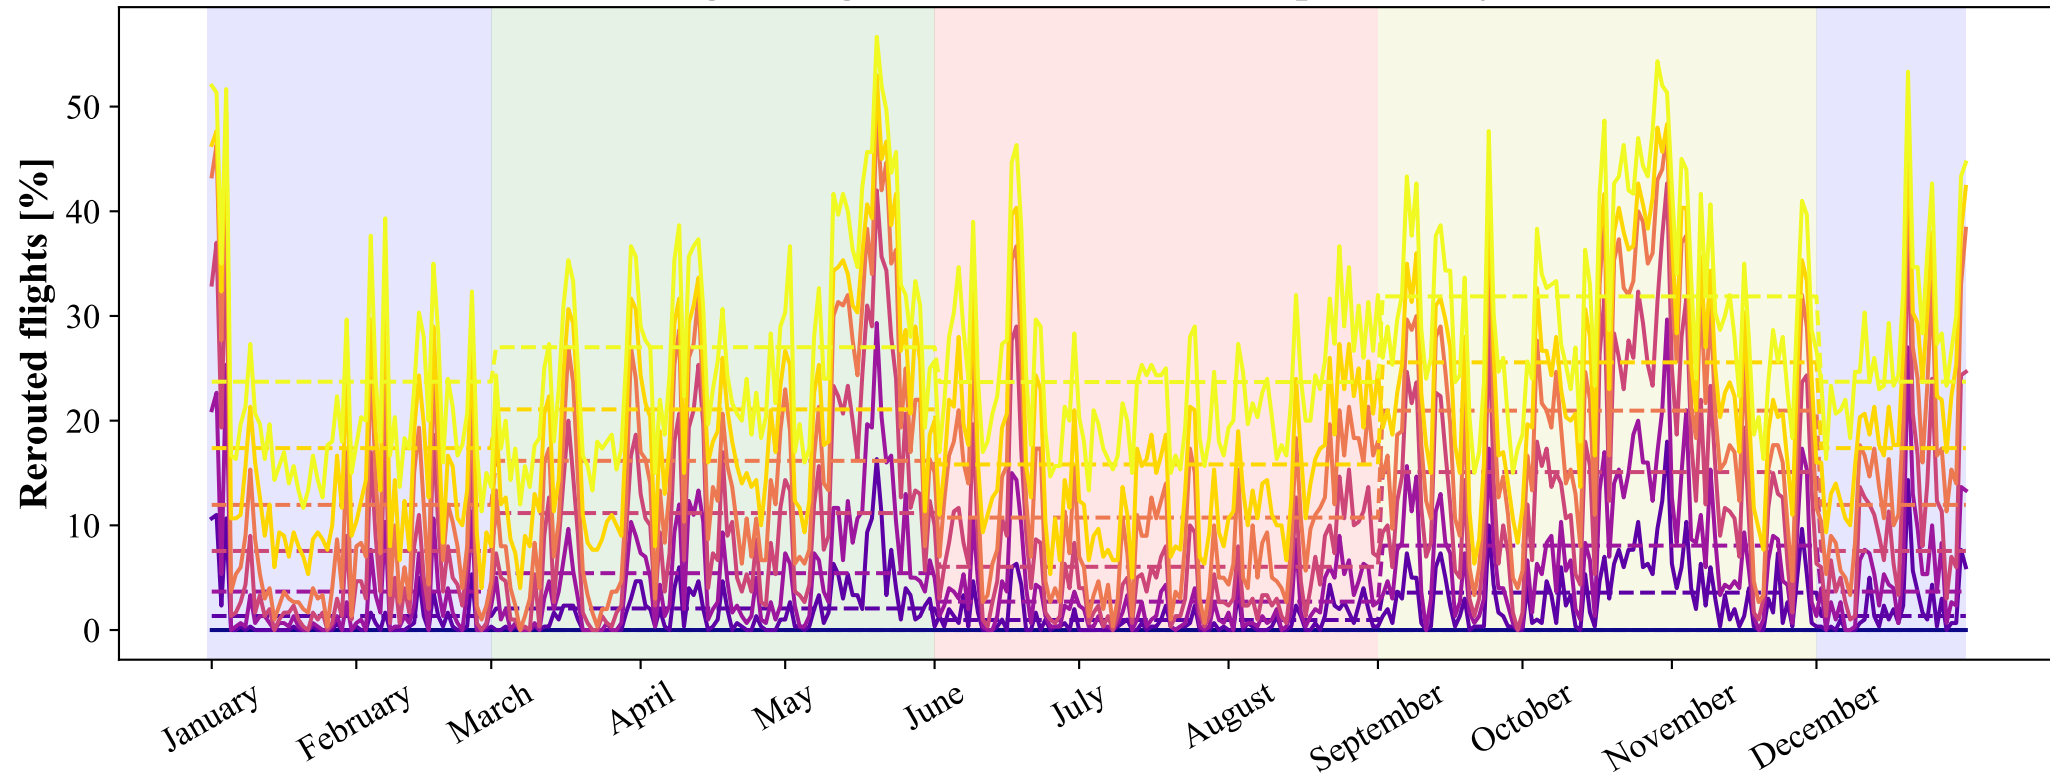

Supplement: Supplementary file 5 [file re-routed_flights.pdf › plots_0.2%_SOC_different_rerouting_limits/re-routed_flights.pdf]

# Climate Impact Mitigation Potential [%]

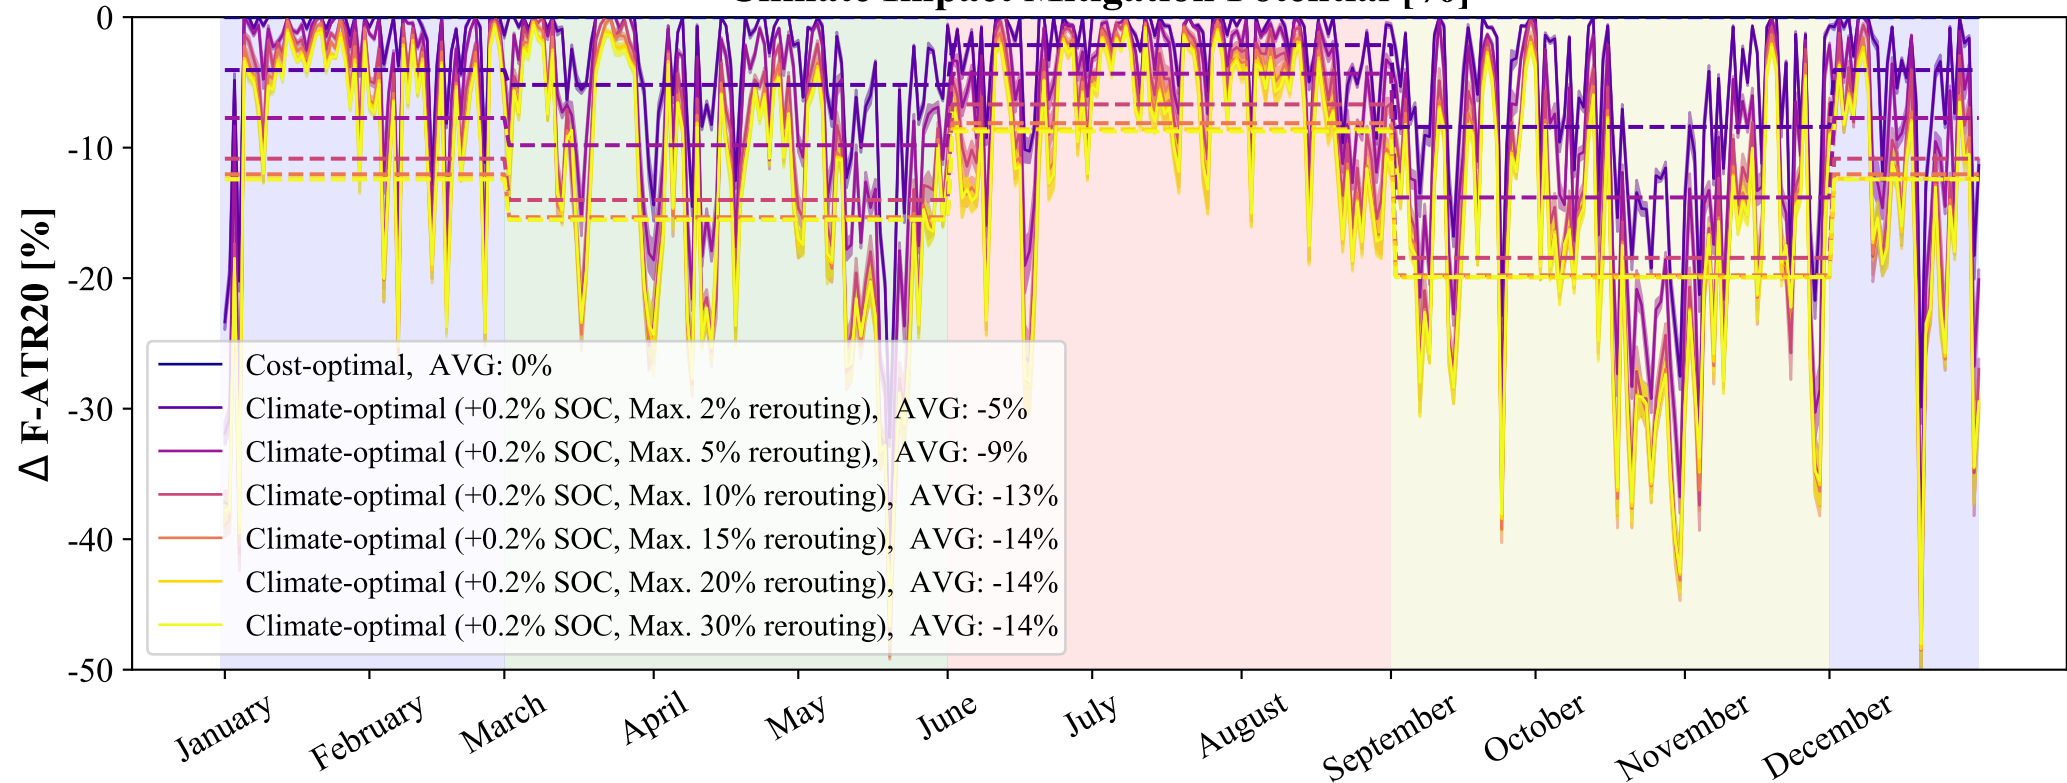

Supplement: Supplementary file 6 [file relative_mitigation_atr_20.pdf › plots_0.2%_SOC_different_rerouting_limits/relative_mitigation_atr_20.pdf]

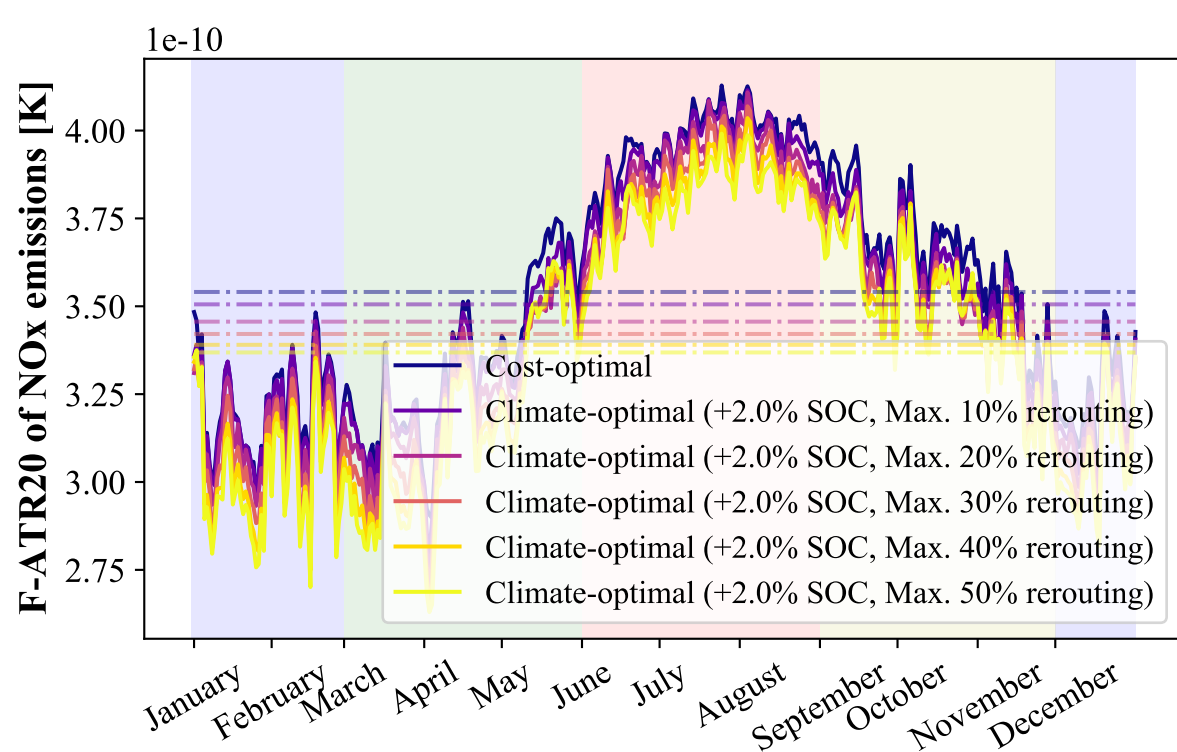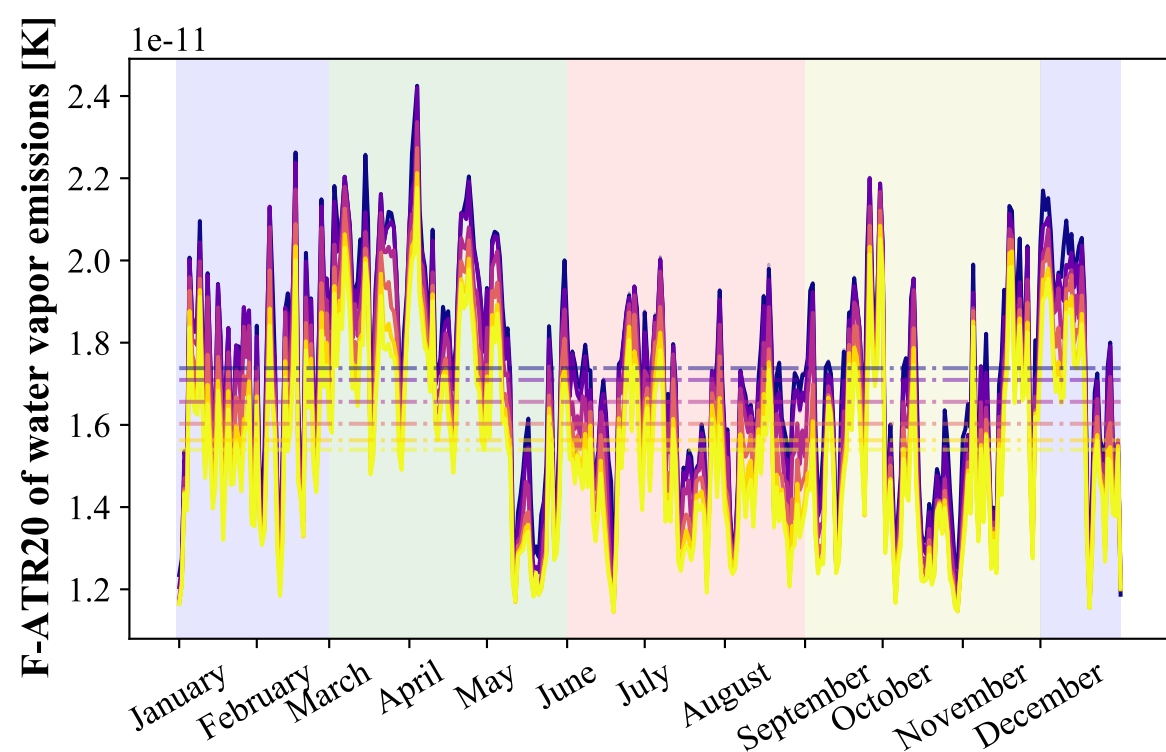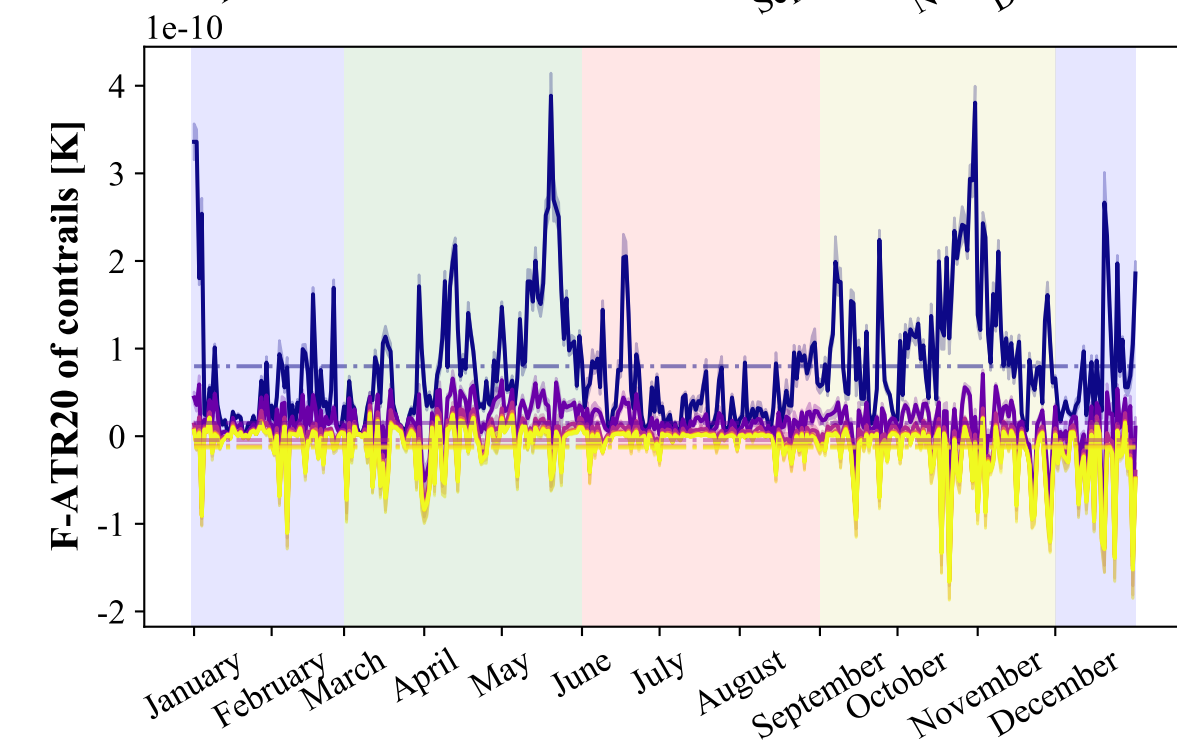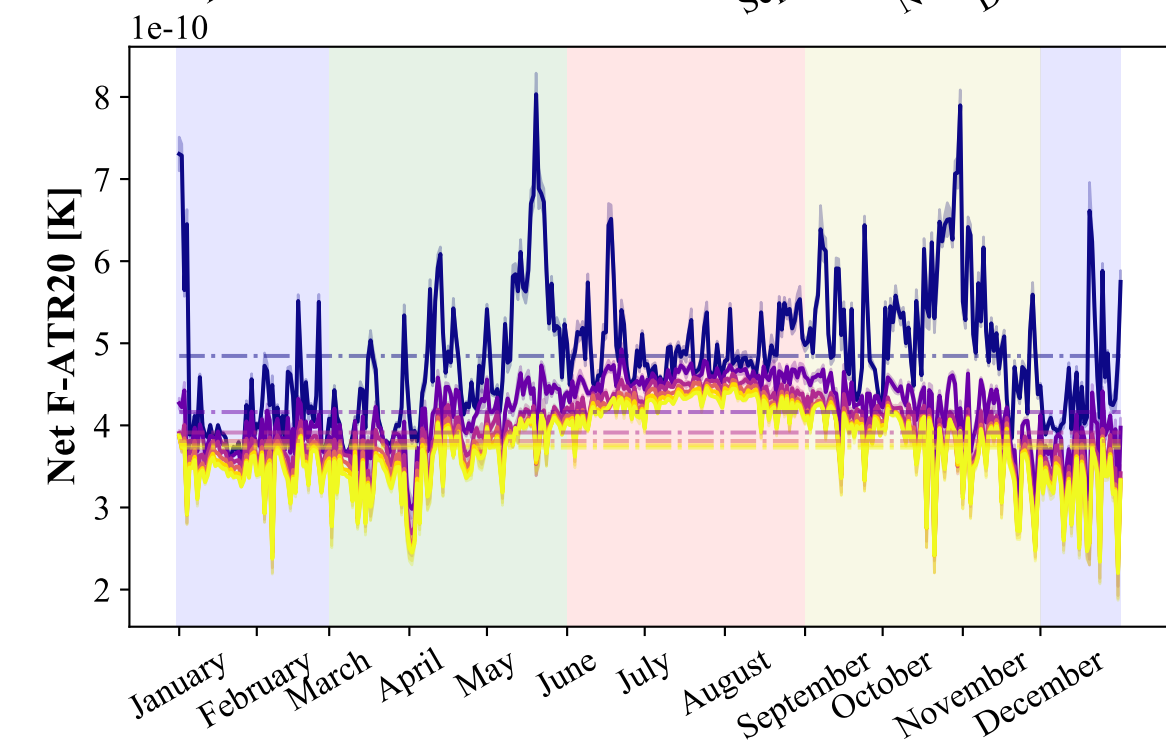

Supplement: Supplementary file 7 [file climate_new.pdf › plots_2.0%_SOC_different_rerouting_limits/climate_new.pdf]

### Departure at 0000 UTC

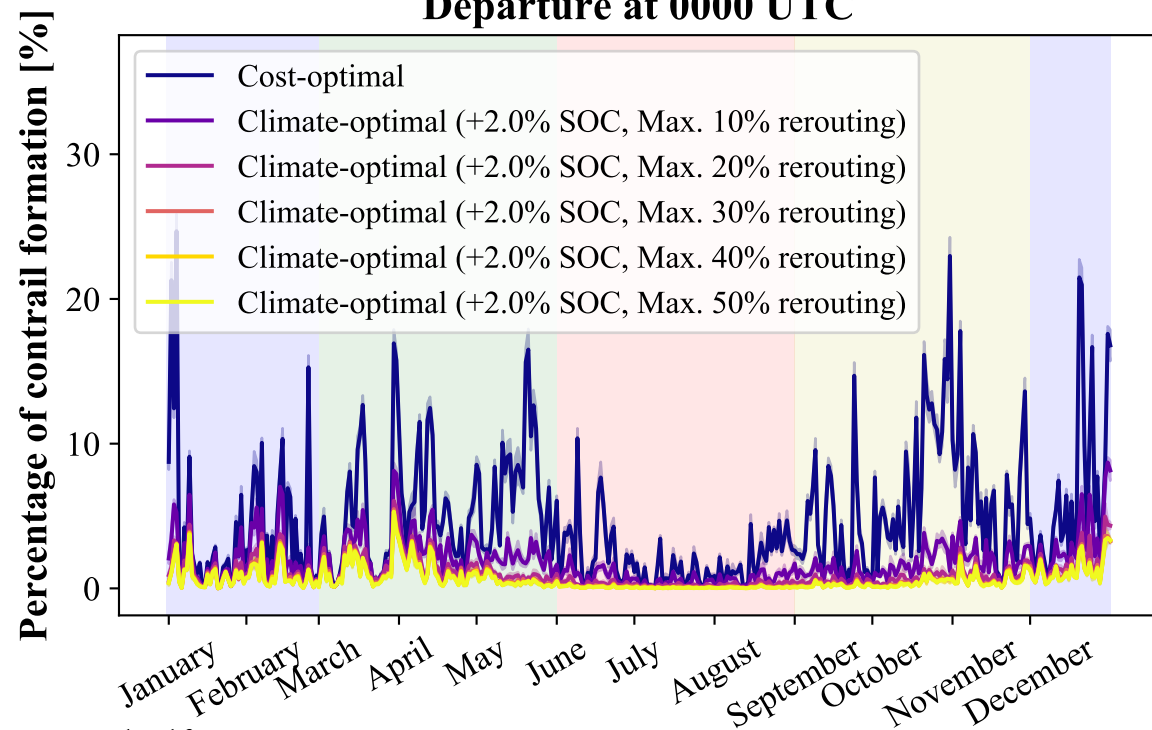

### F-ATR20 of contrails [K]

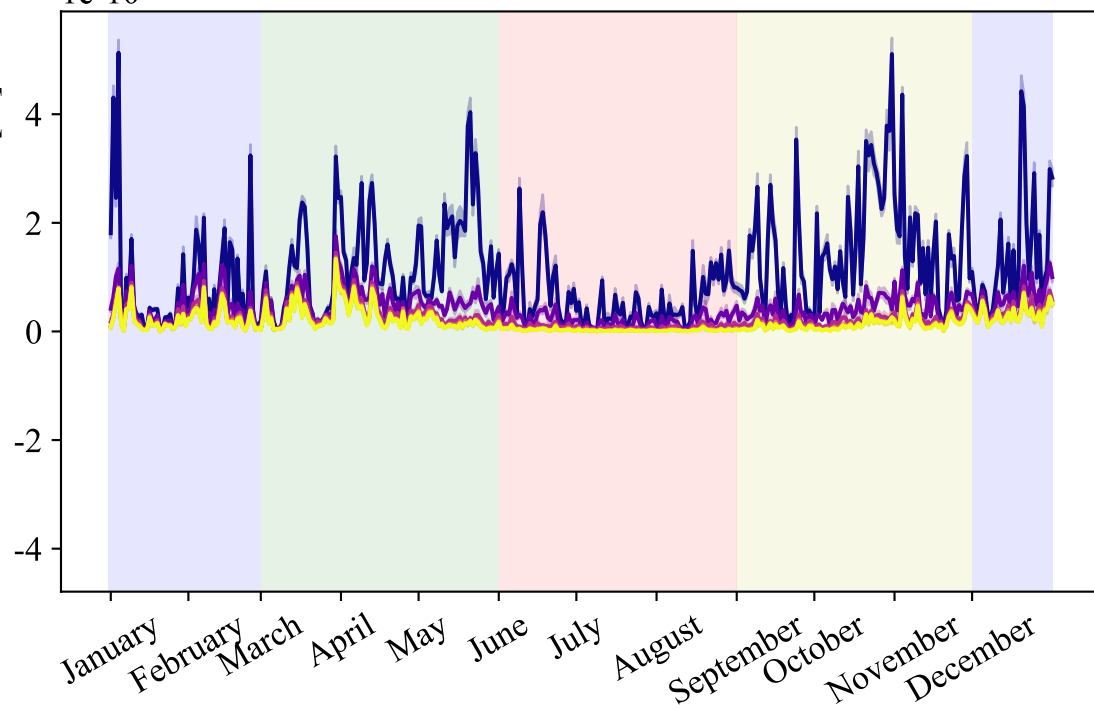

### Departure at 1200 UTC

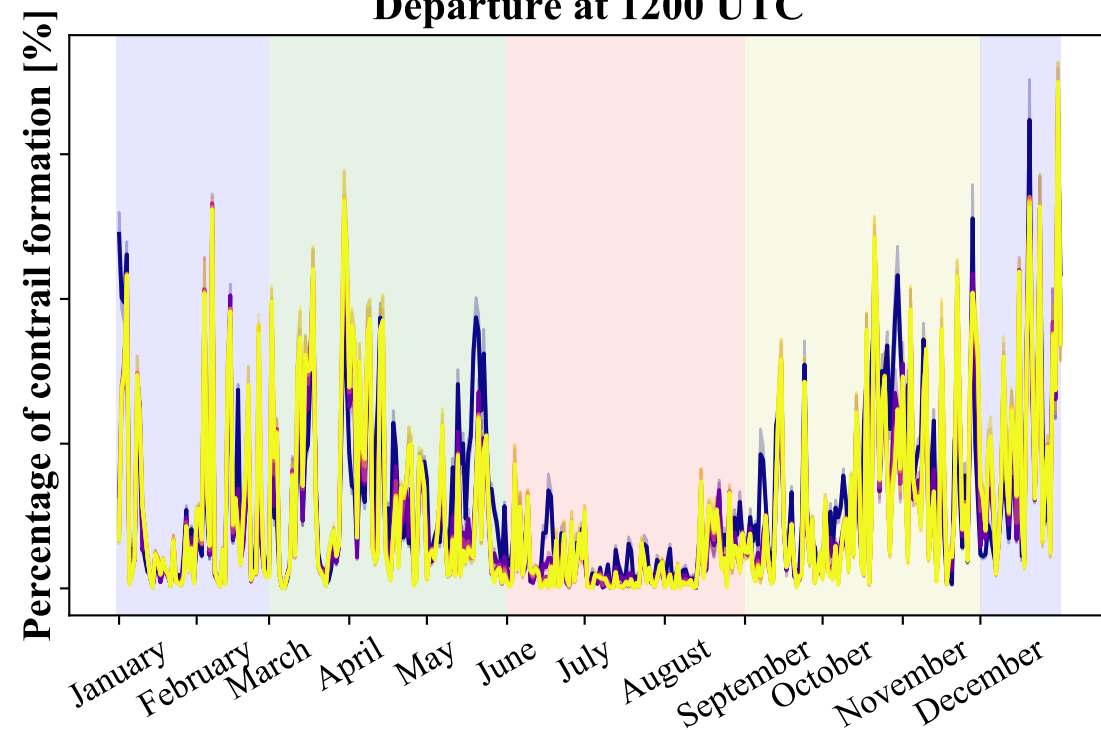

### F-ATR20 of contrails [K]

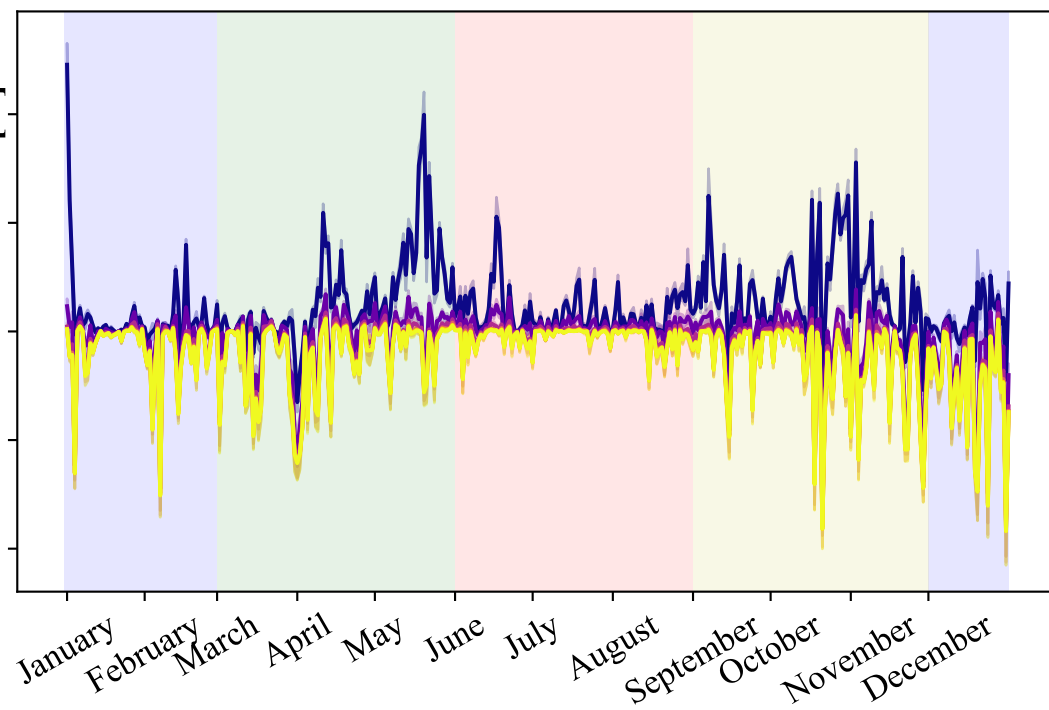

Supplement: Supplementary file 8 [file contrail.pdf › plots_2.0%_SOC_different_rerouting_limits/contrail.pdf]

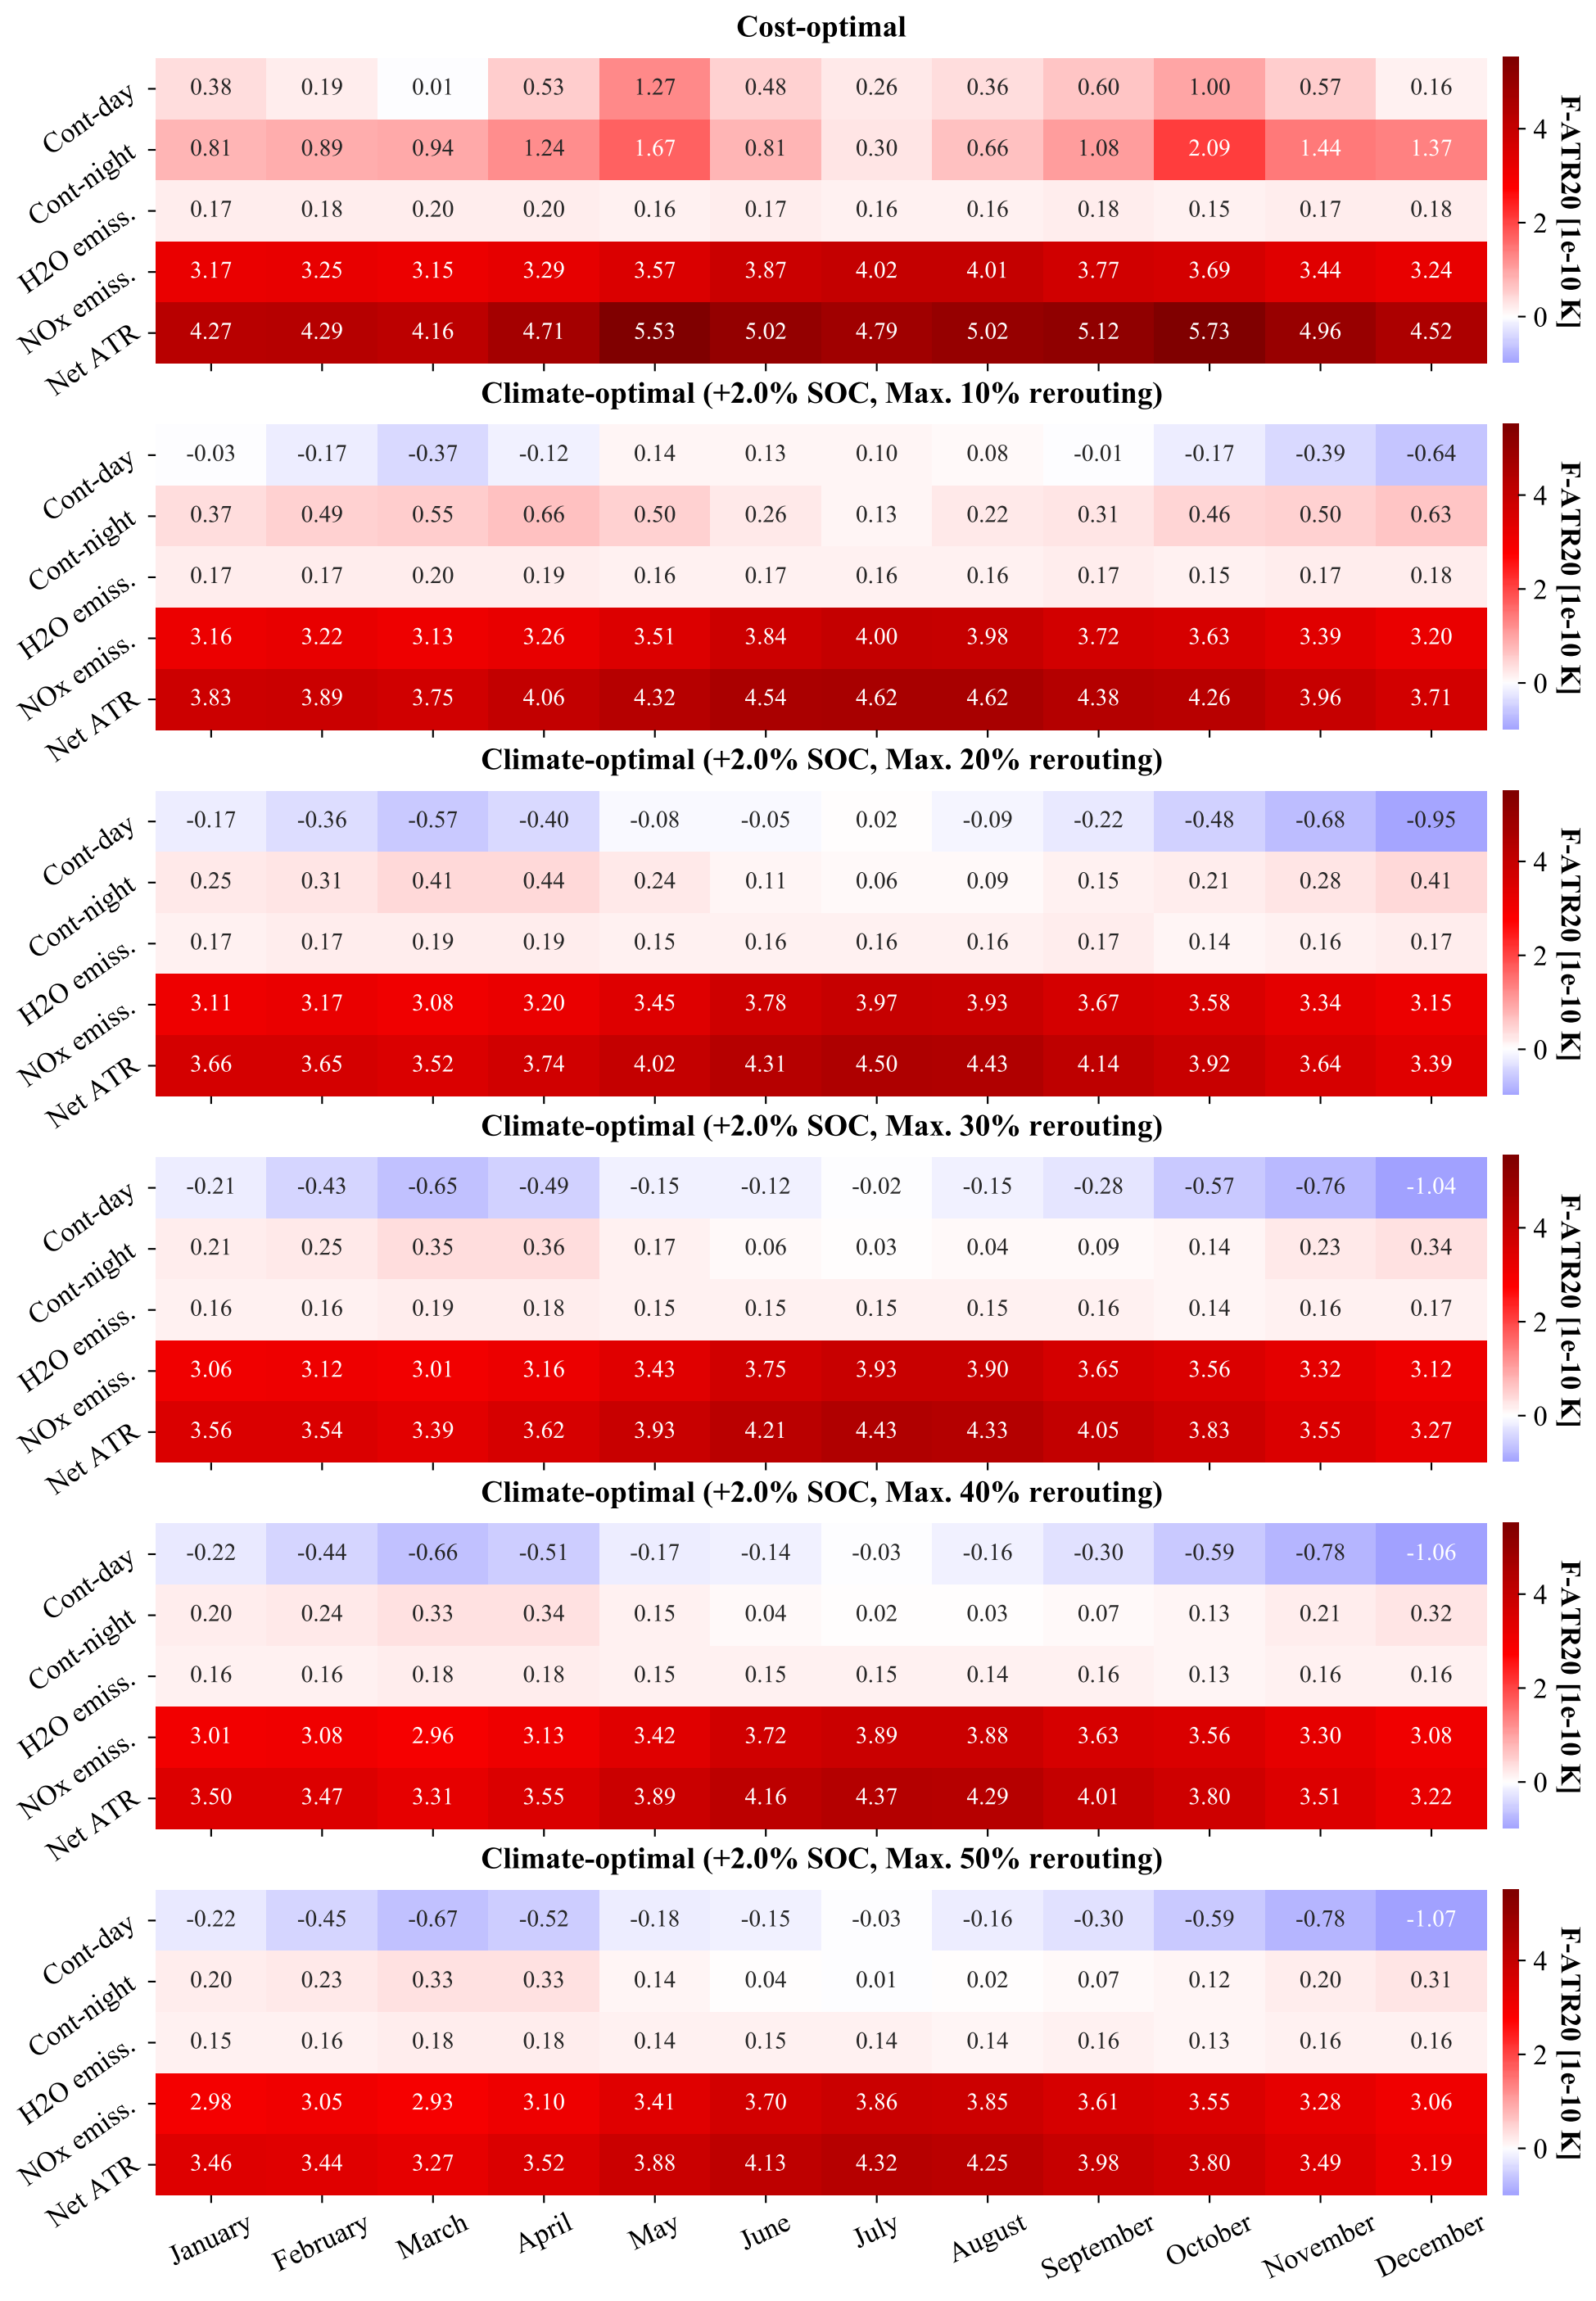

Supplement: Supplementary file 9 [file cost_opt.pdf › plots_2.0%_SOC_different_rerouting_limits/cost_opt.pdf]

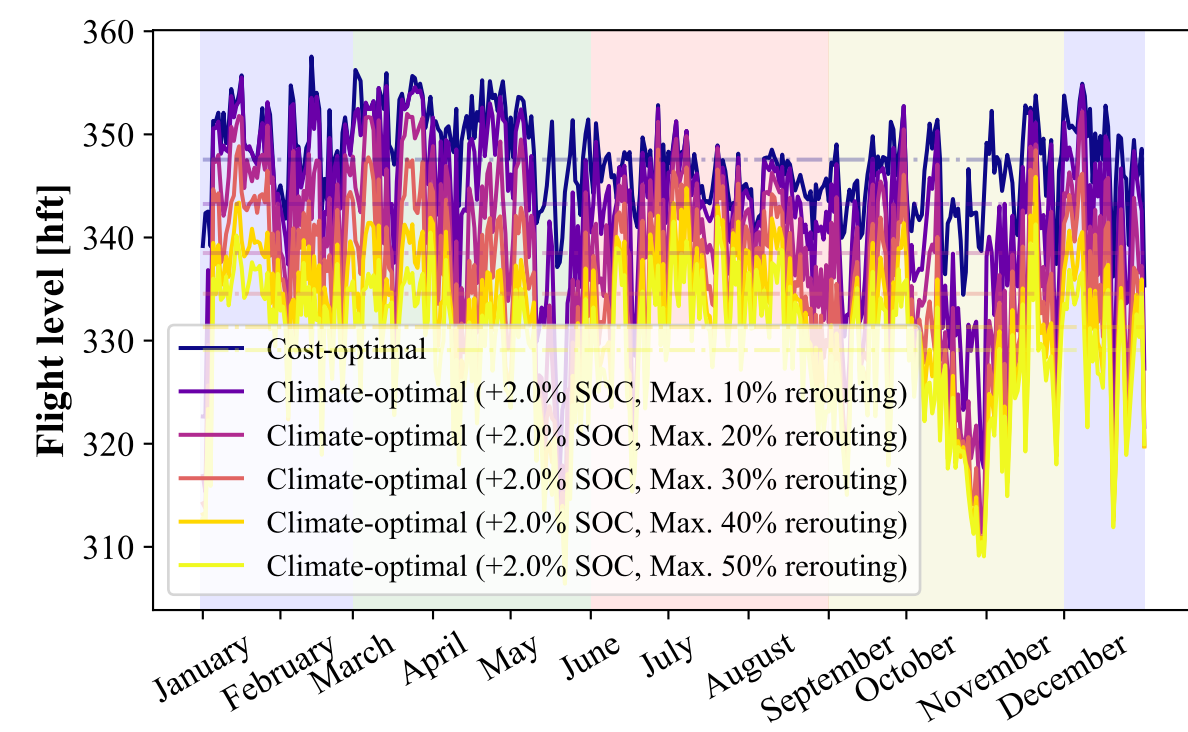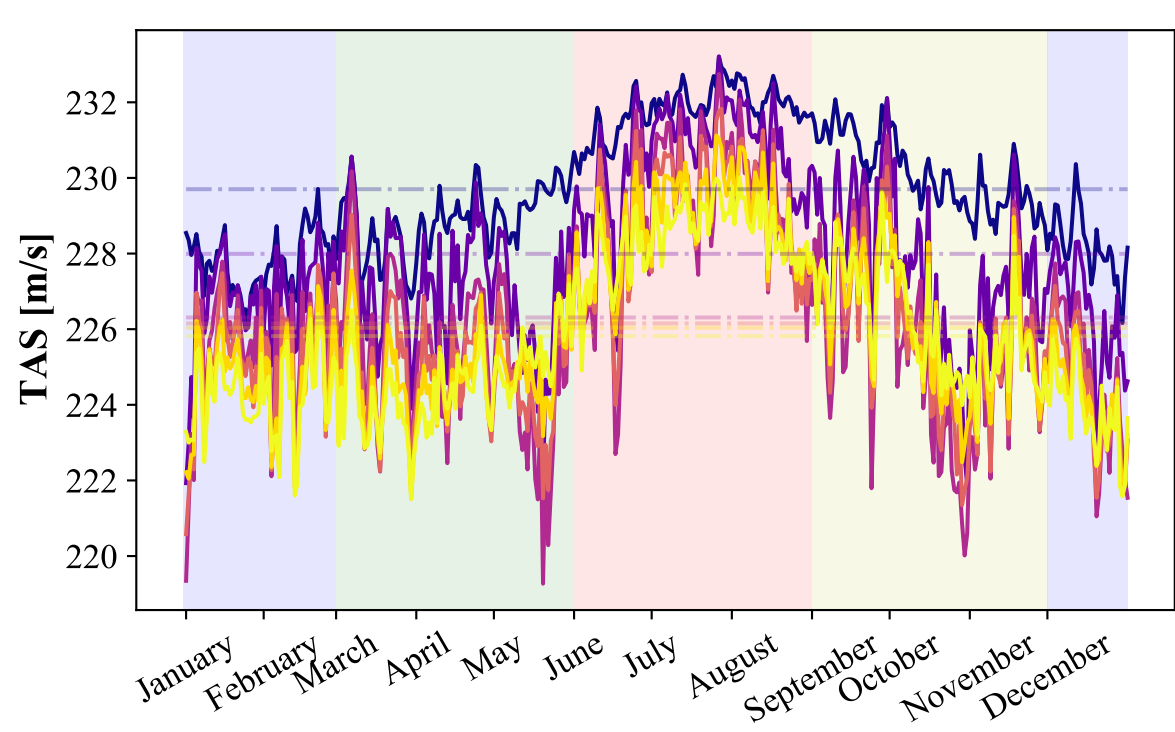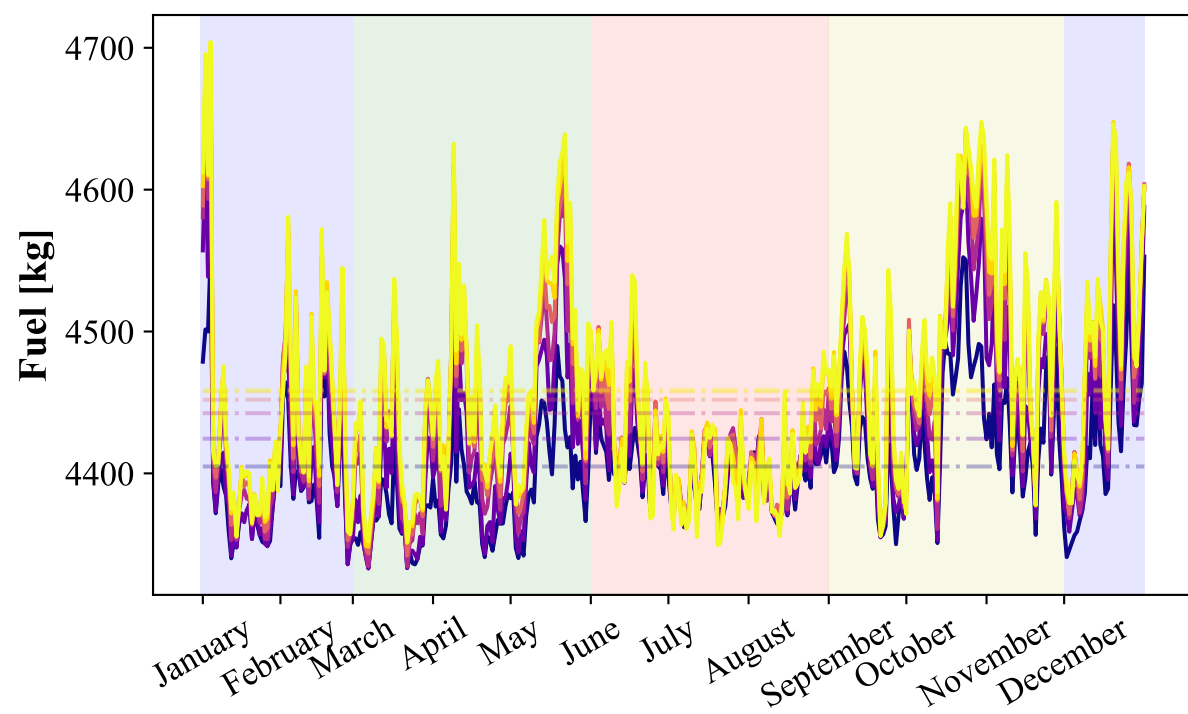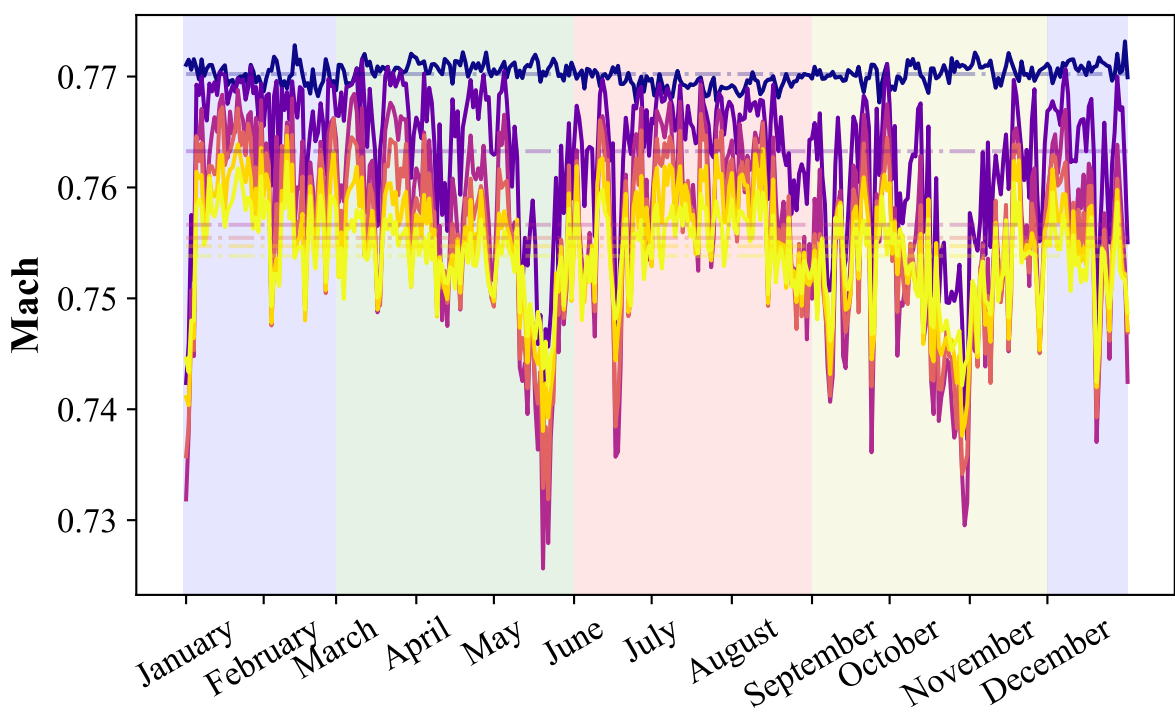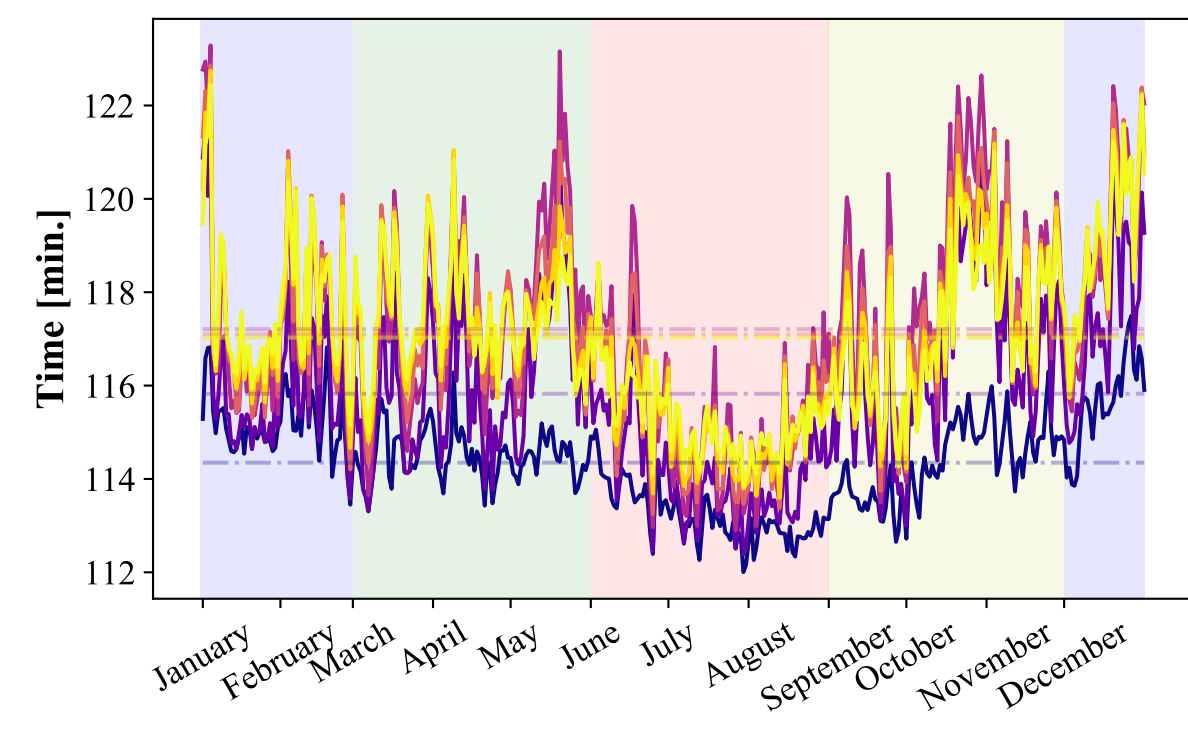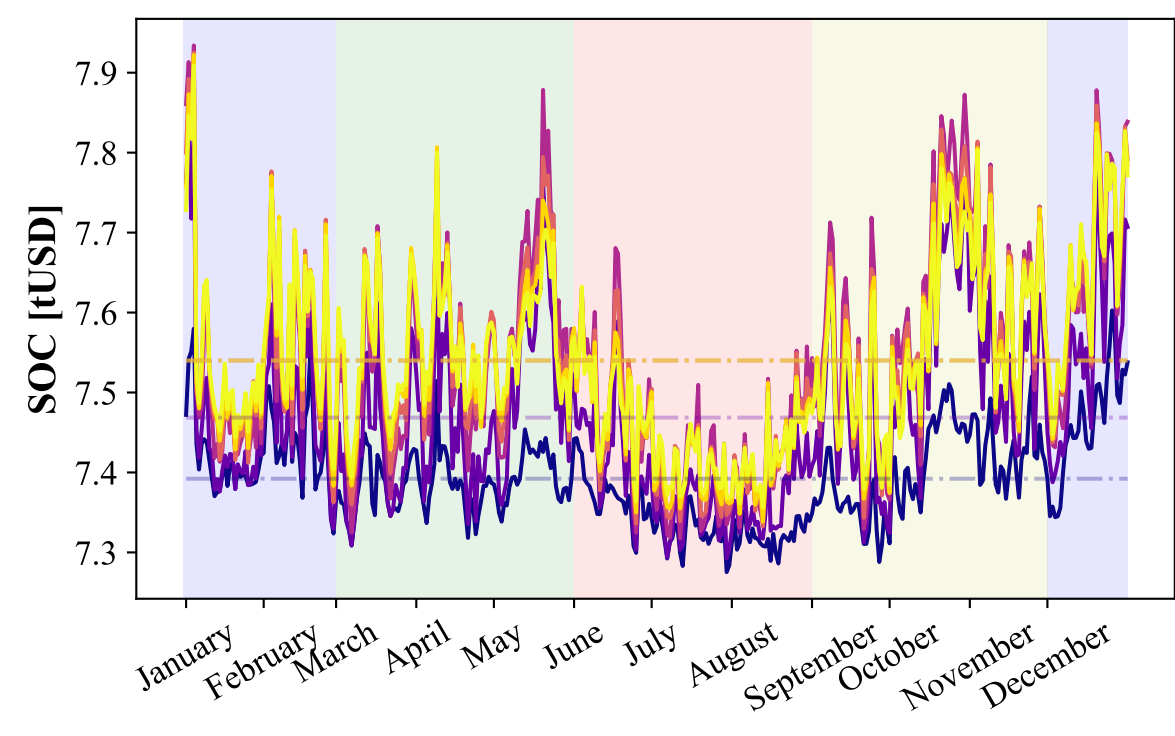

Supplement: Supplementary file 10 [file cost_related_3.pdf › plots_2.0%_SOC_different_rerouting_limits/cost_related_3.pdf]

**Percentage of flights deviated from cost-optimal trajectories**

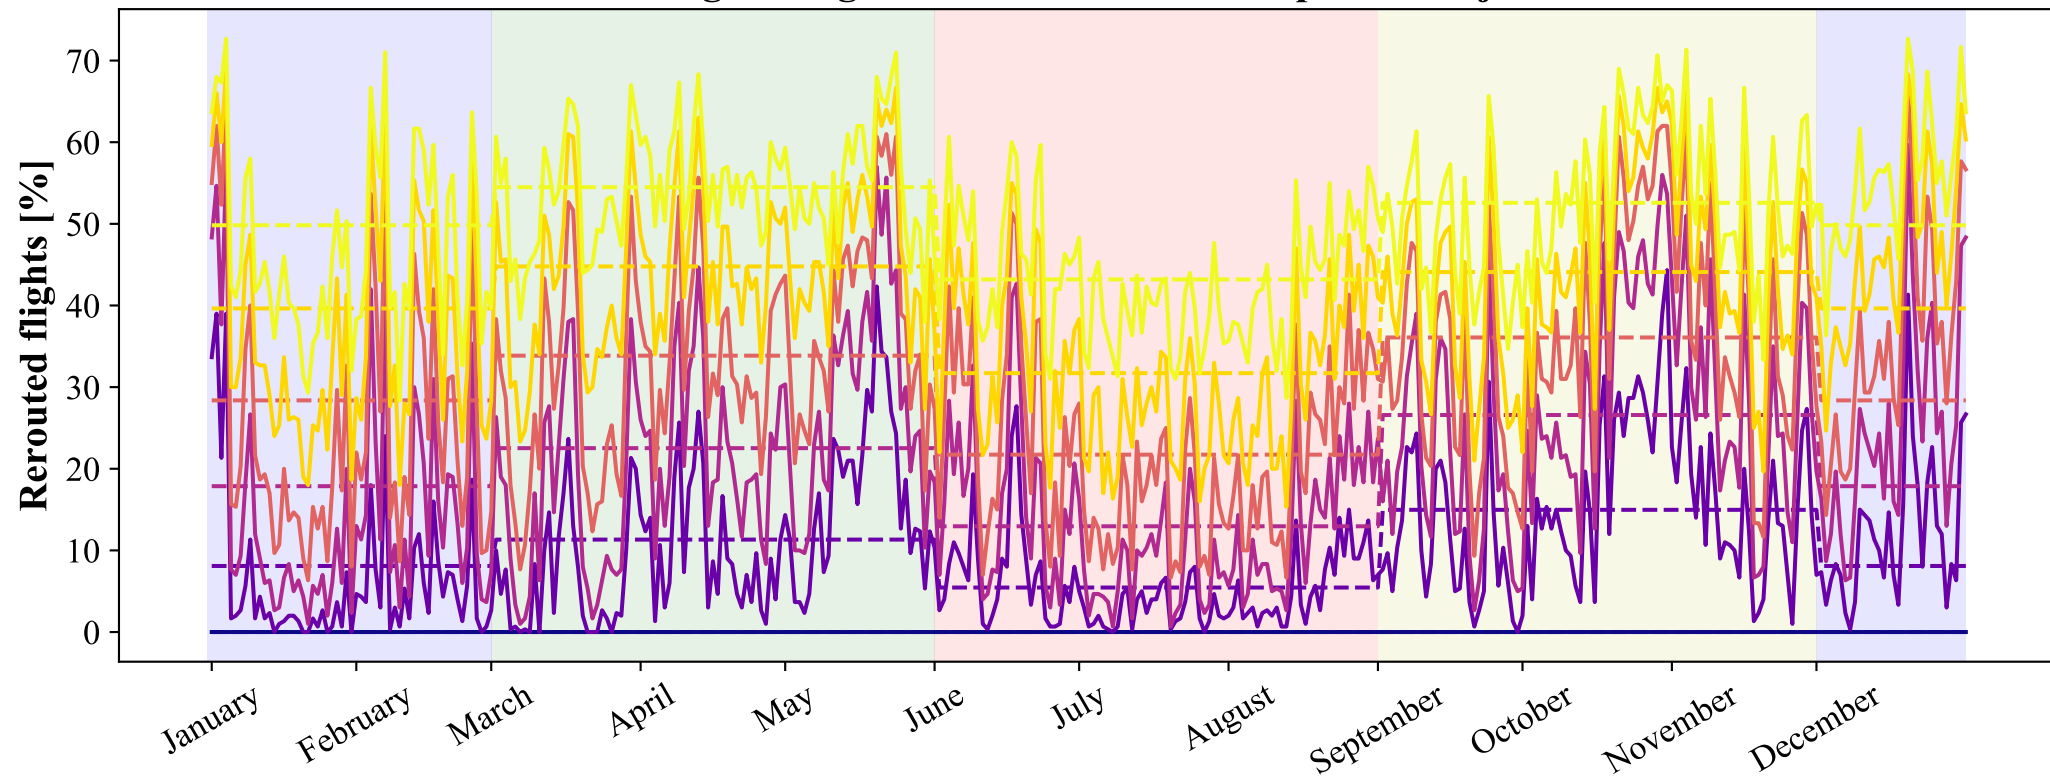

Supplement: Supplementary file 11 [file re-routed_flights.pdf › plots_2.0%_SOC_different_rerouting_limits/re-routed_flights.pdf]

# Climate Impact Mitigation Potential [%]

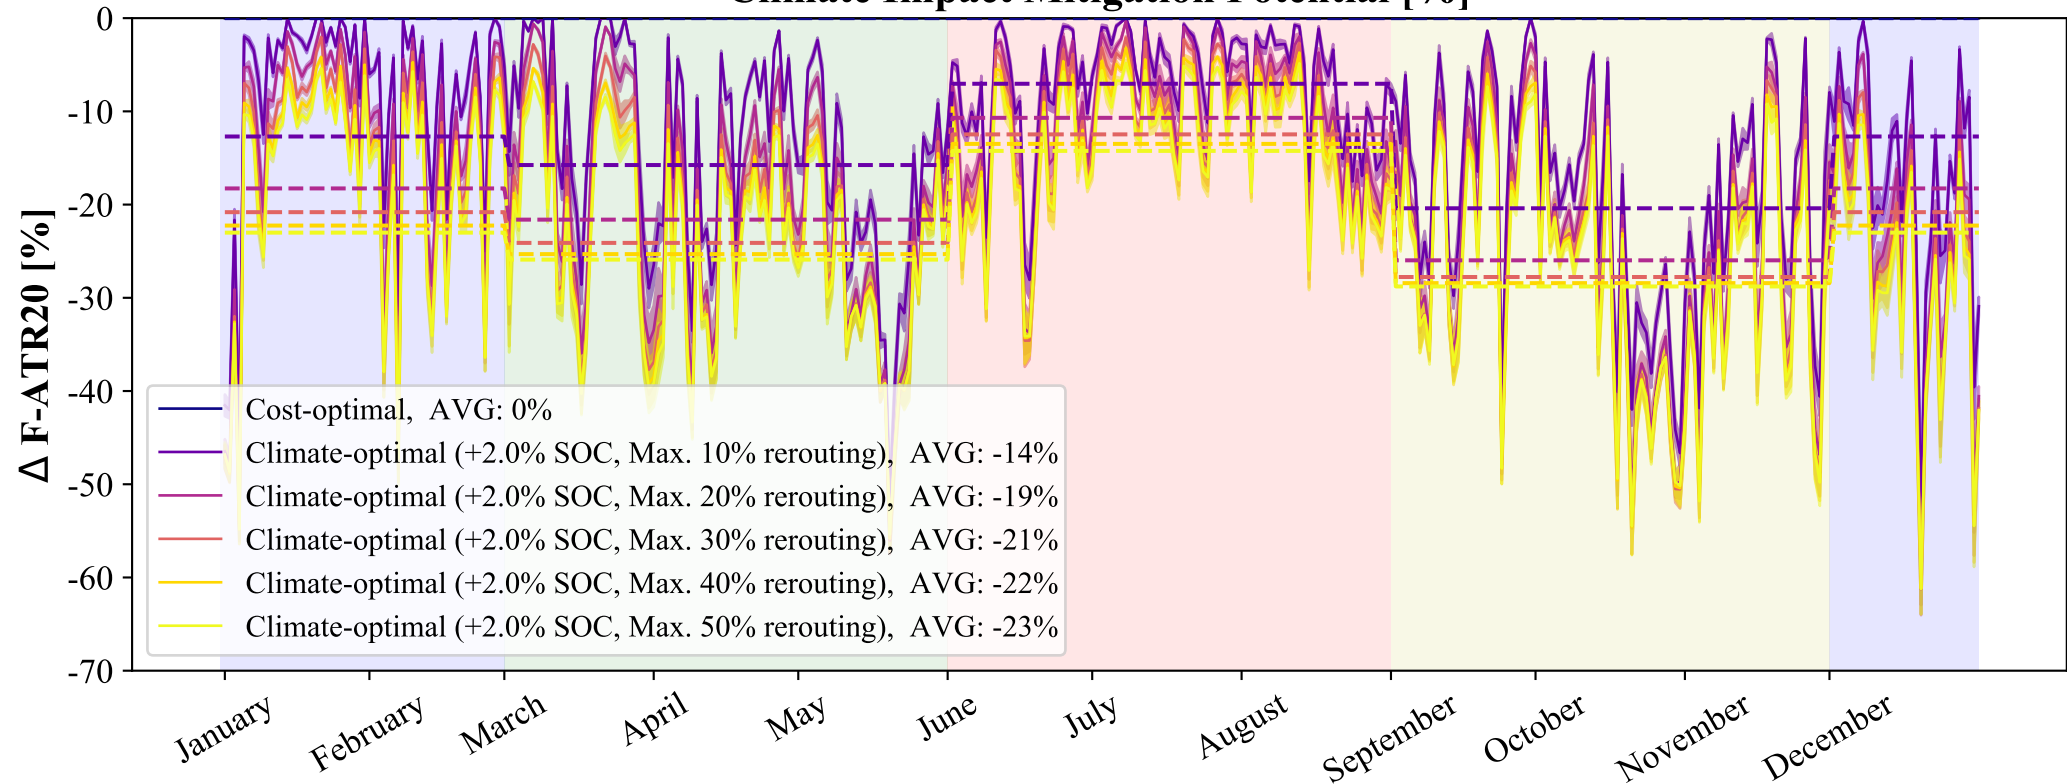

Supplement: Supplementary file 12 [file relative_mitigation_atr_20.pdf › plots_2.0%_SOC_different_rerouting_limits/relative_mitigation_atr_20.pdf]

# Climate-sensitivity to H2O emissions & selected flight levels with different routing options

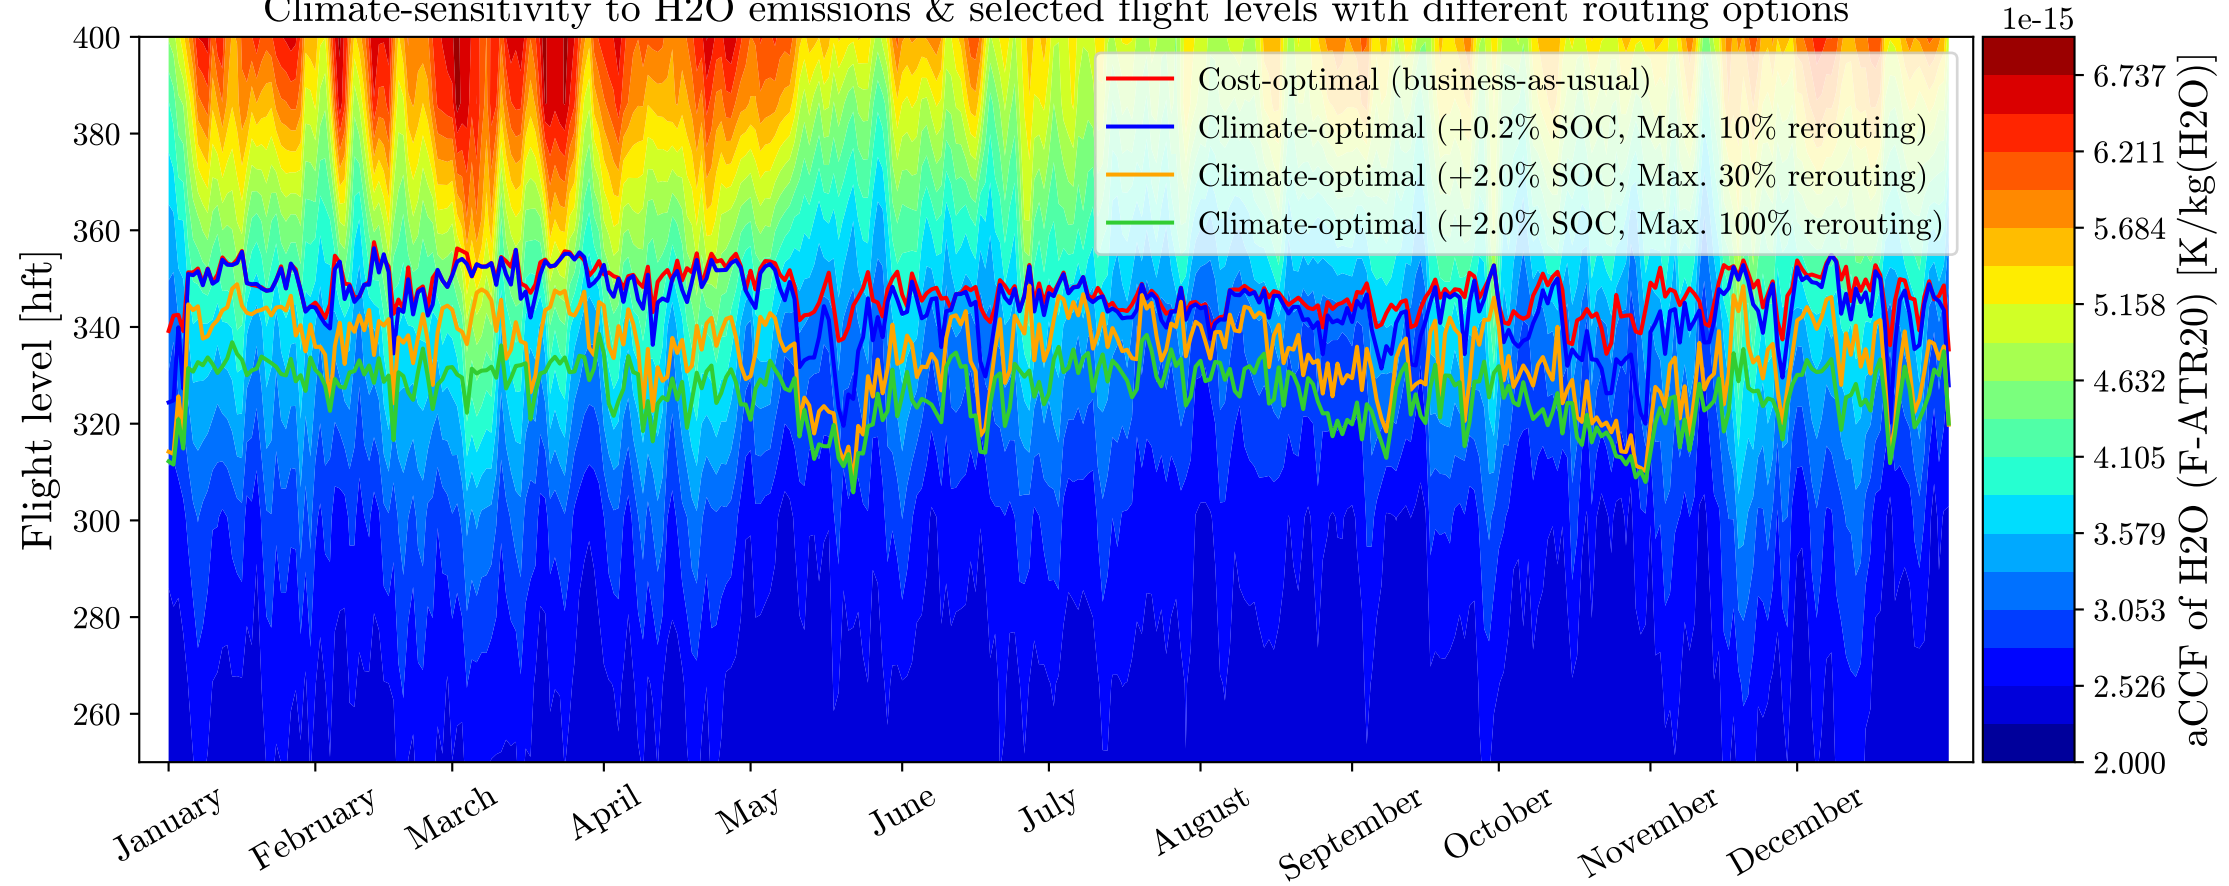

Supplement: Supplementary file 13 [file H2OvsFL.pdf › plots_main_paper/H2OvsFL.pdf]

# Climate-sensitivity to NOx emissions & selected flight levels with different routing options

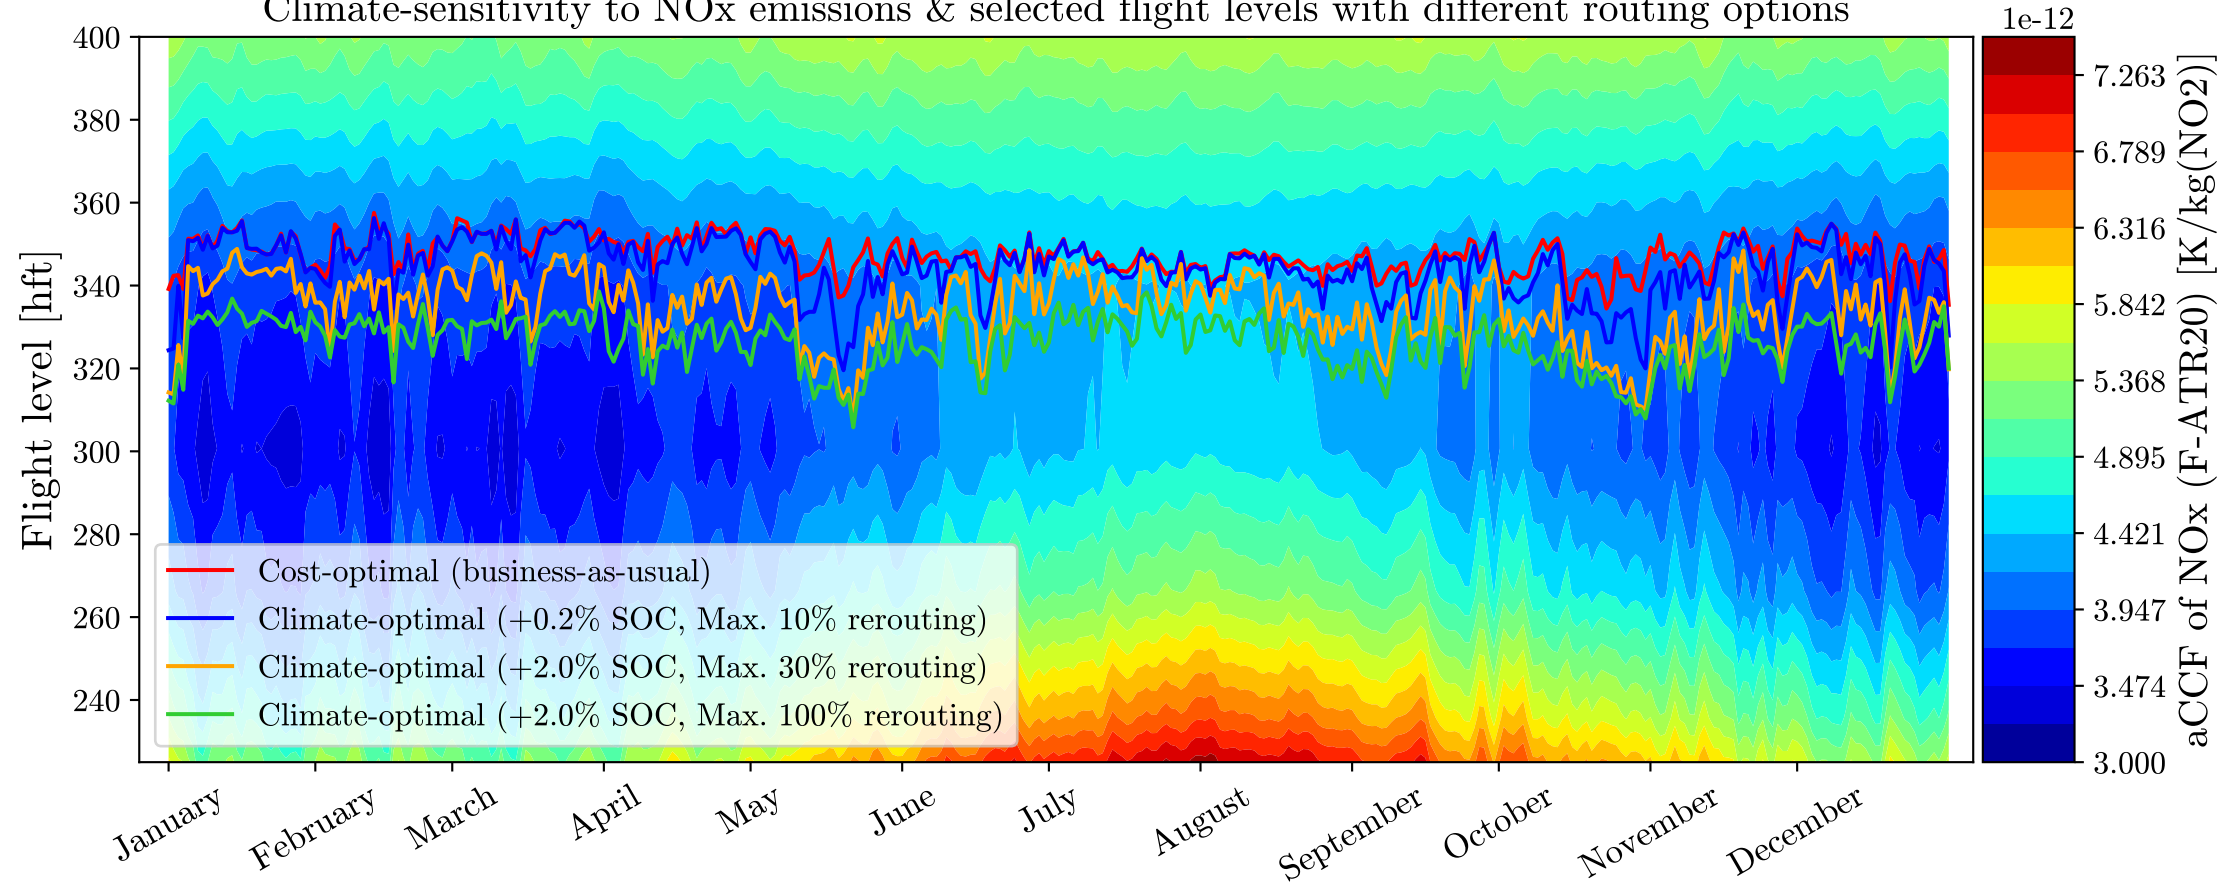

Supplement: Supplementary file 14 [file NOxvsFL.pdf › plots_main_paper/NOxvsFL.pdf]

Sensitivity Analysis: Climate Metric (Climate-optimal (+2.0 SOC, Max. 30% rerouting))

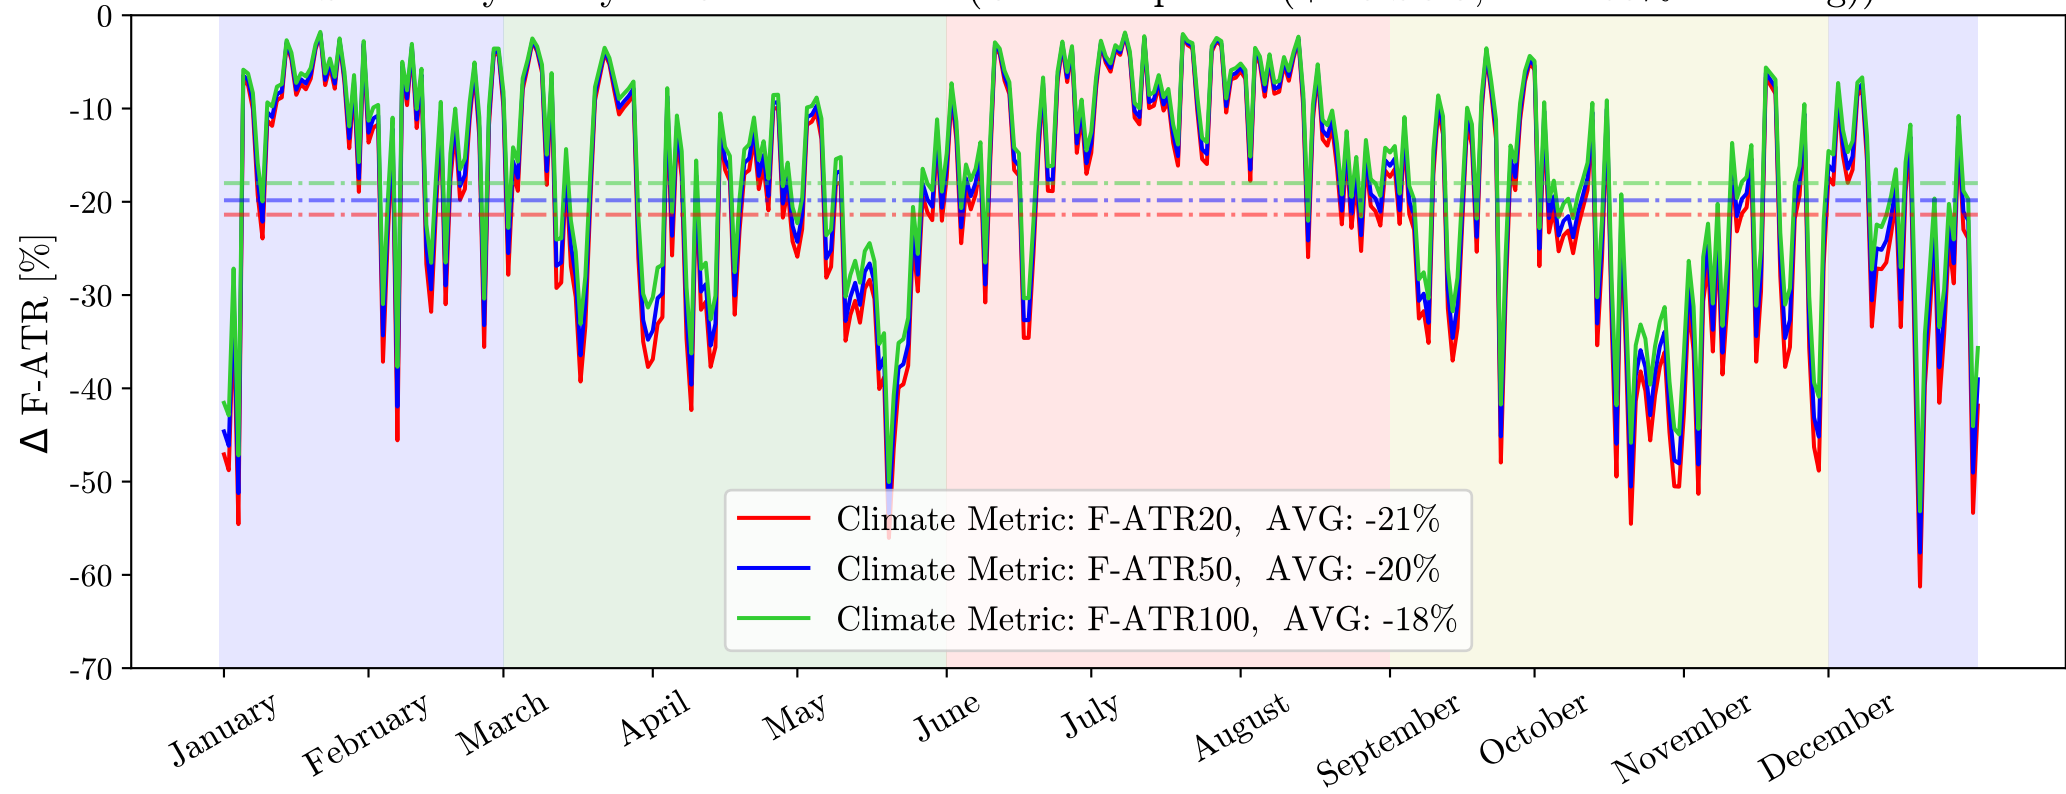

Supplement: Supplementary file 15 [file climate metric.pdf › plots_main_paper/climate metric.pdf]

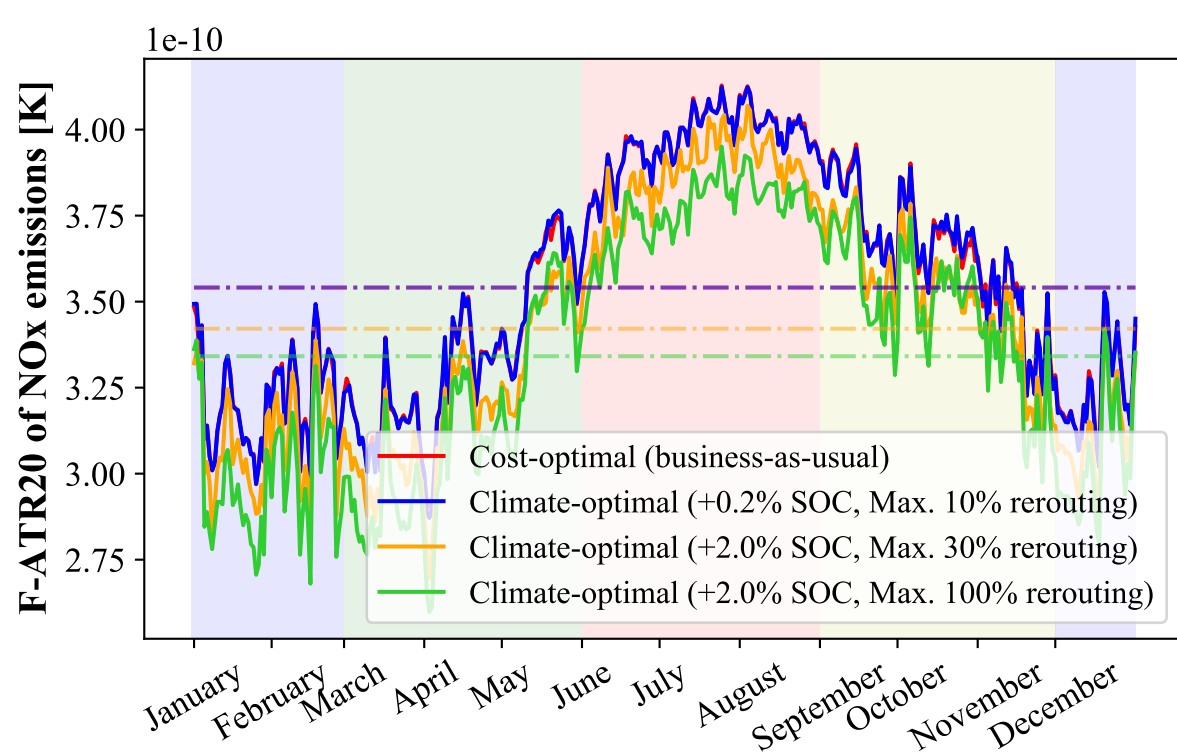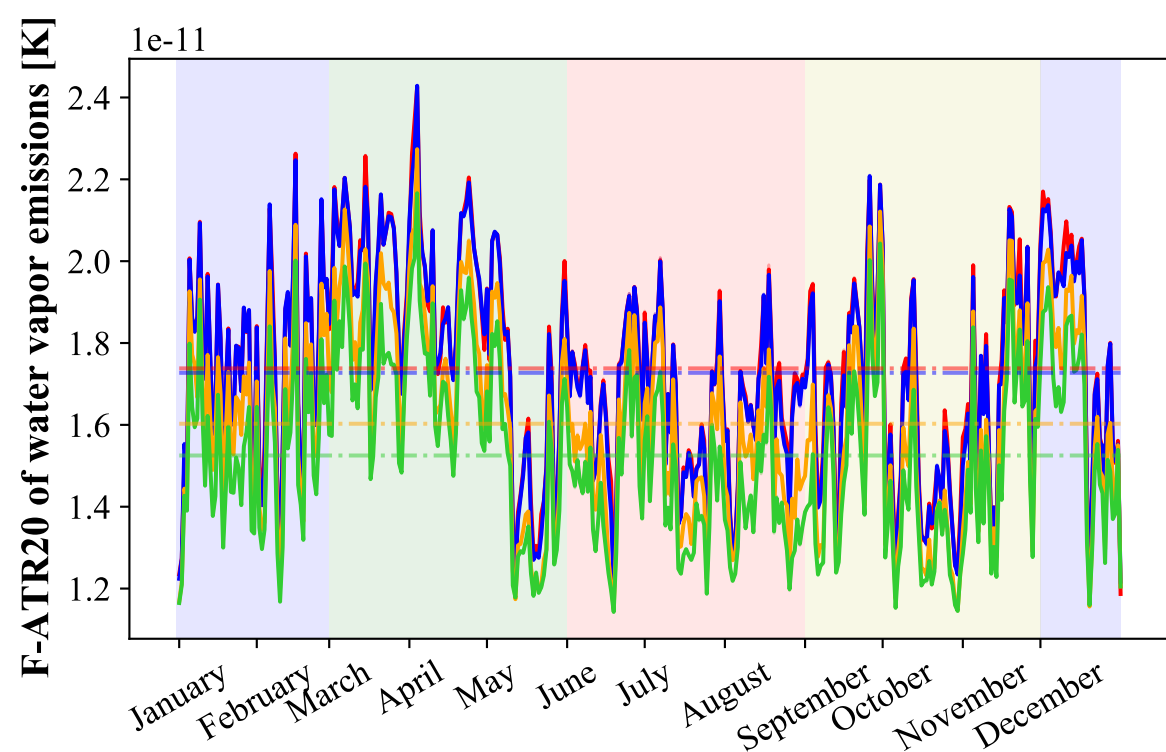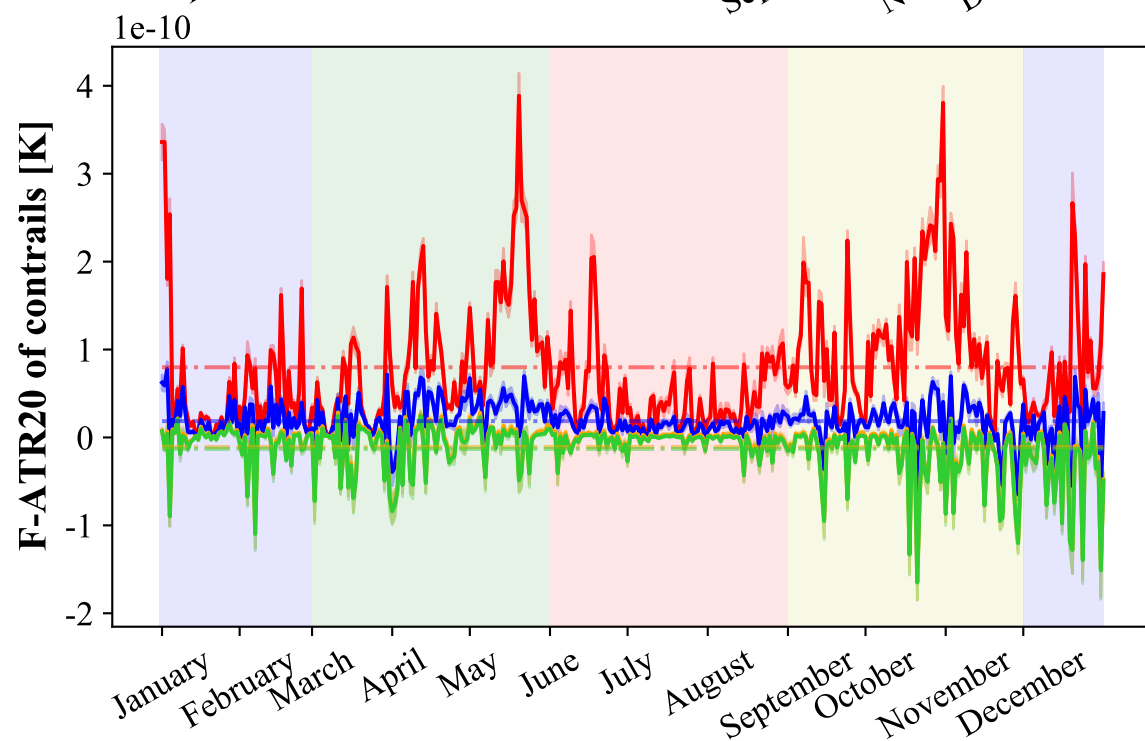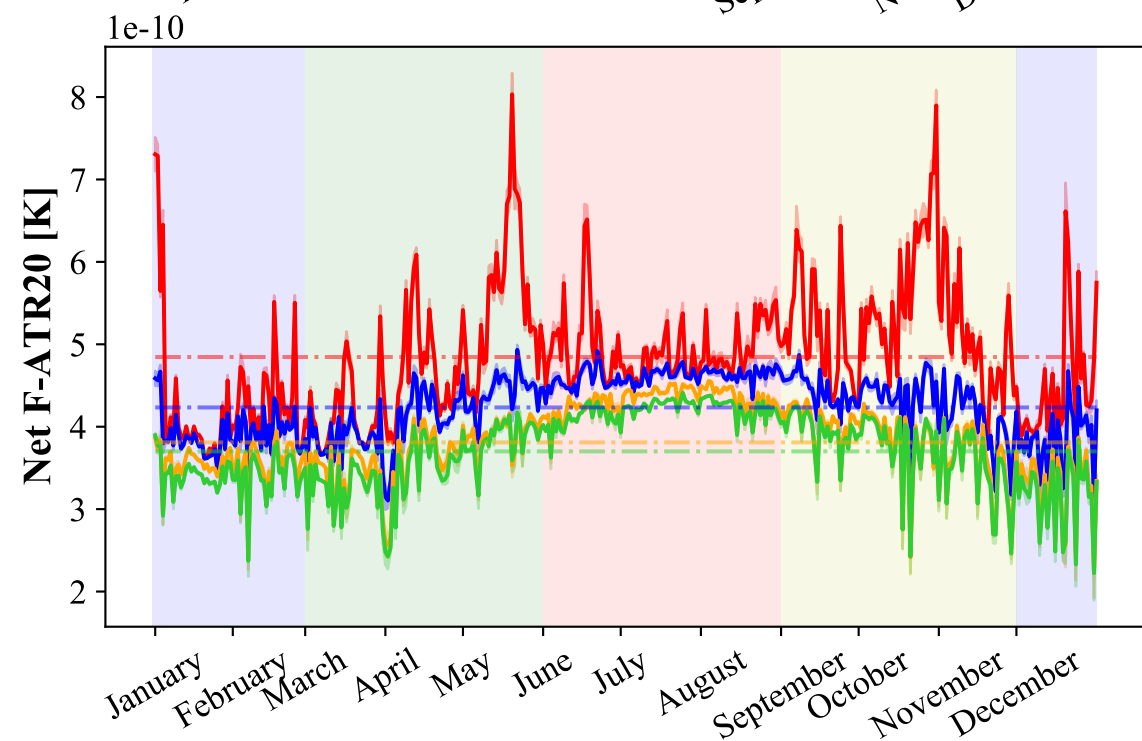

Supplement: Supplementary file 16 [file climate_new.pdf › plots_main_paper/climate_new.pdf]

Coverage of cooling contrails & climate impact mitigation potential

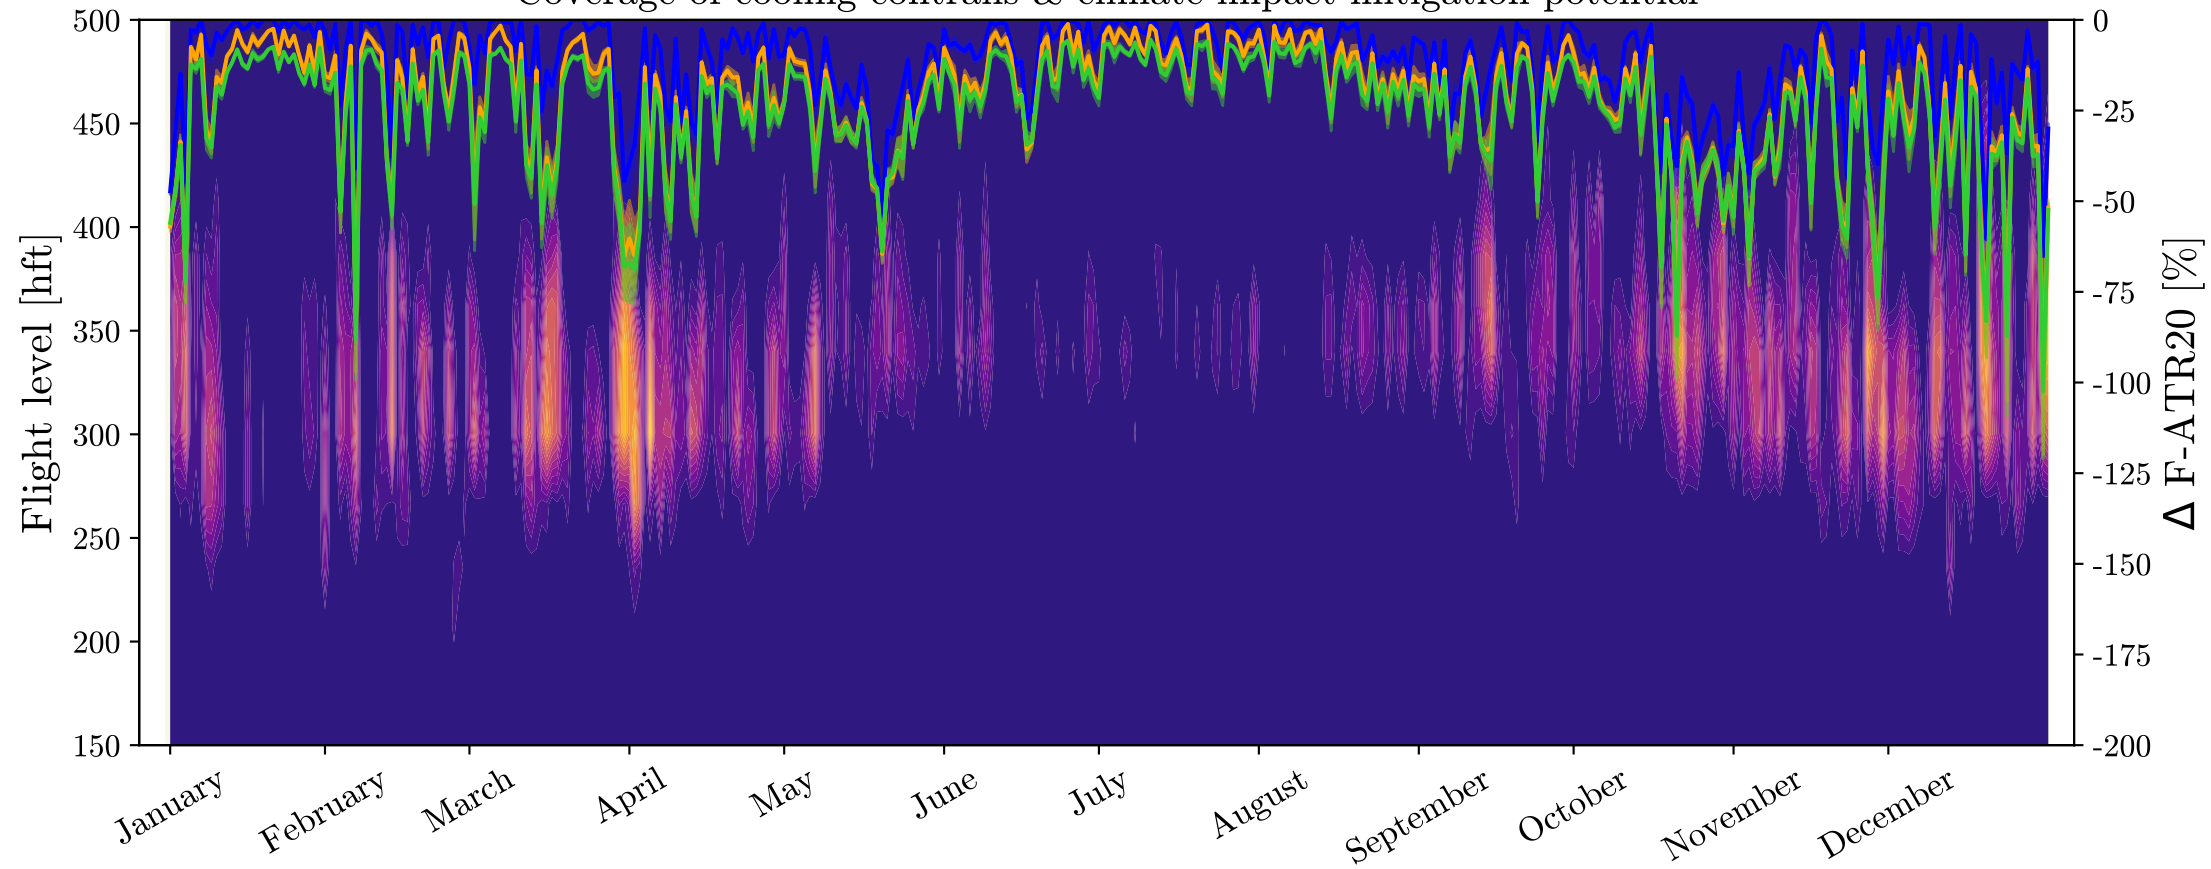

Supplement: Supplementary file 17 [file colling_contrails_mitigation_potential.pdf › plots_main_paper/colling_contrails_mitigation_potential.pdf]

**Departure at 0000 UTC**

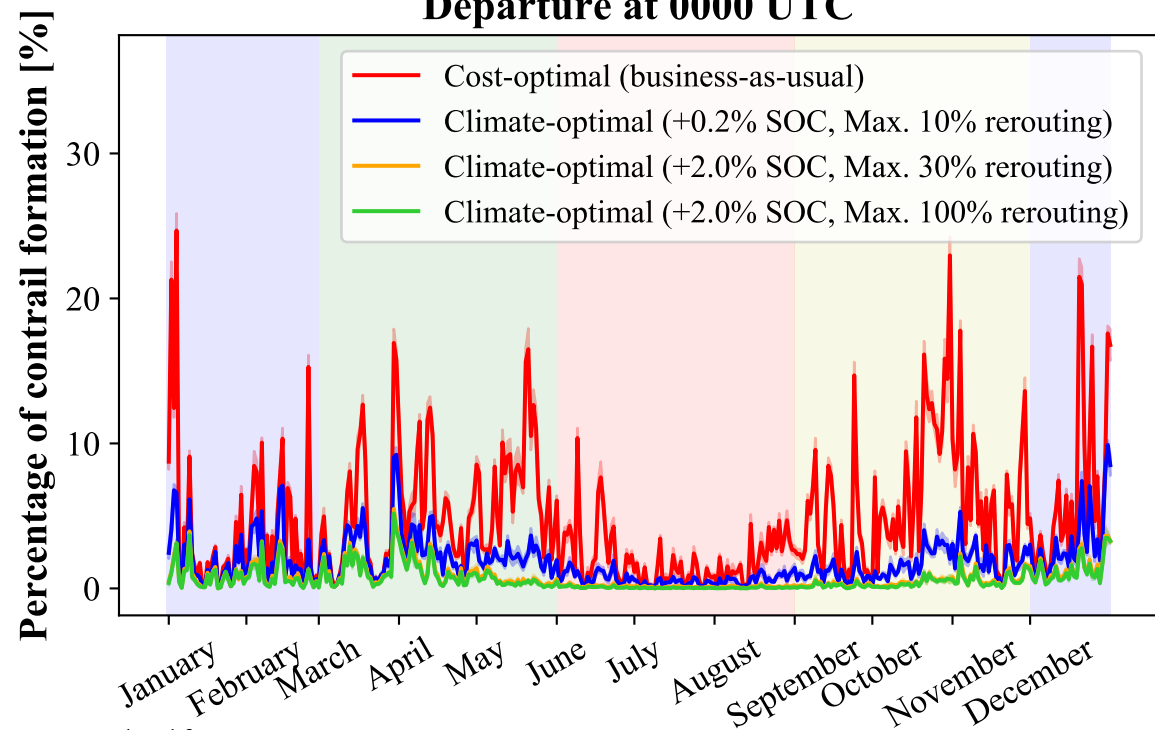

**Departure at 1200 UTC**

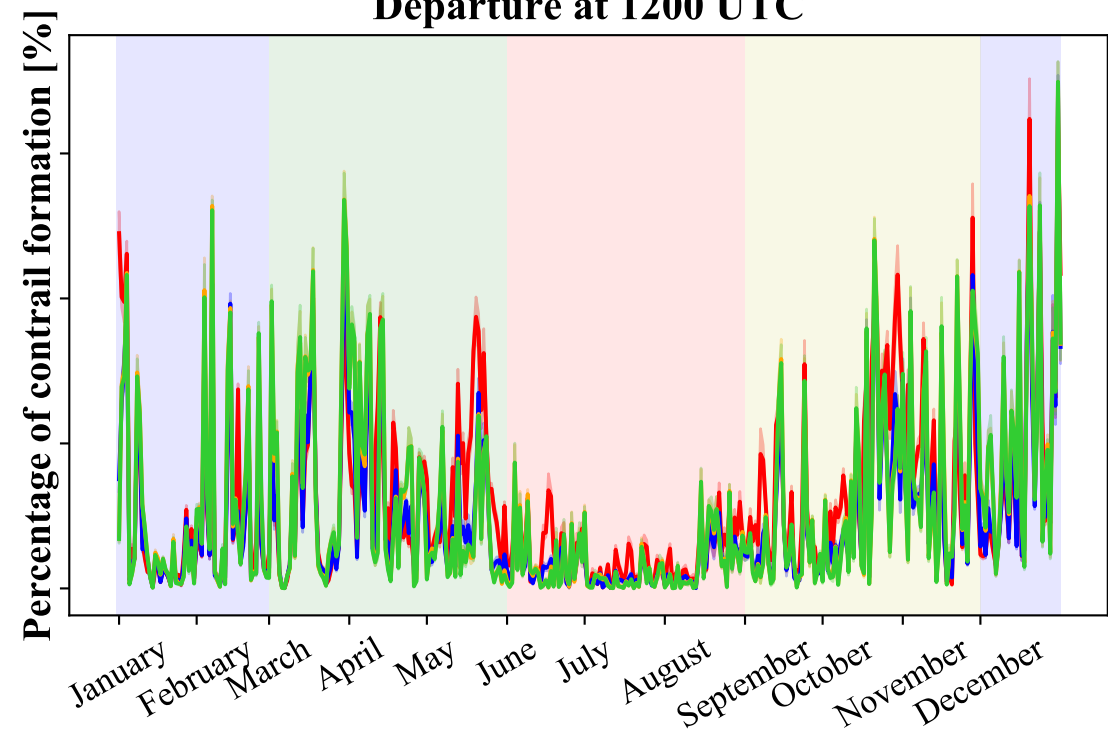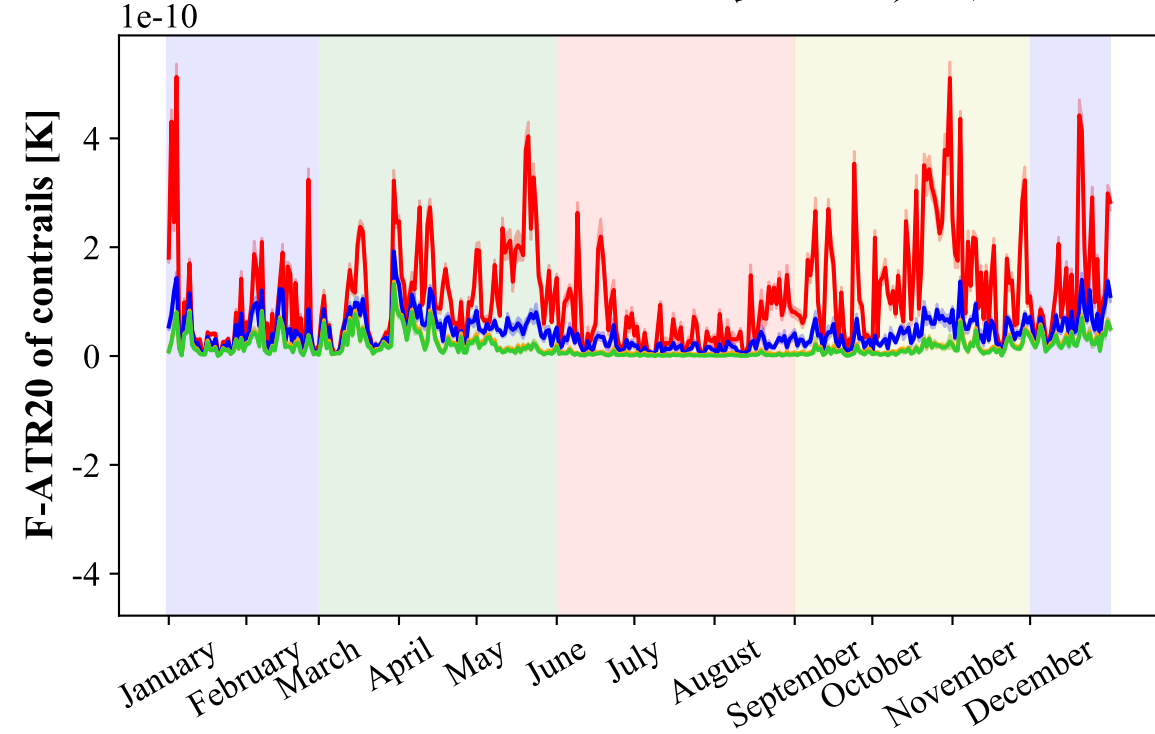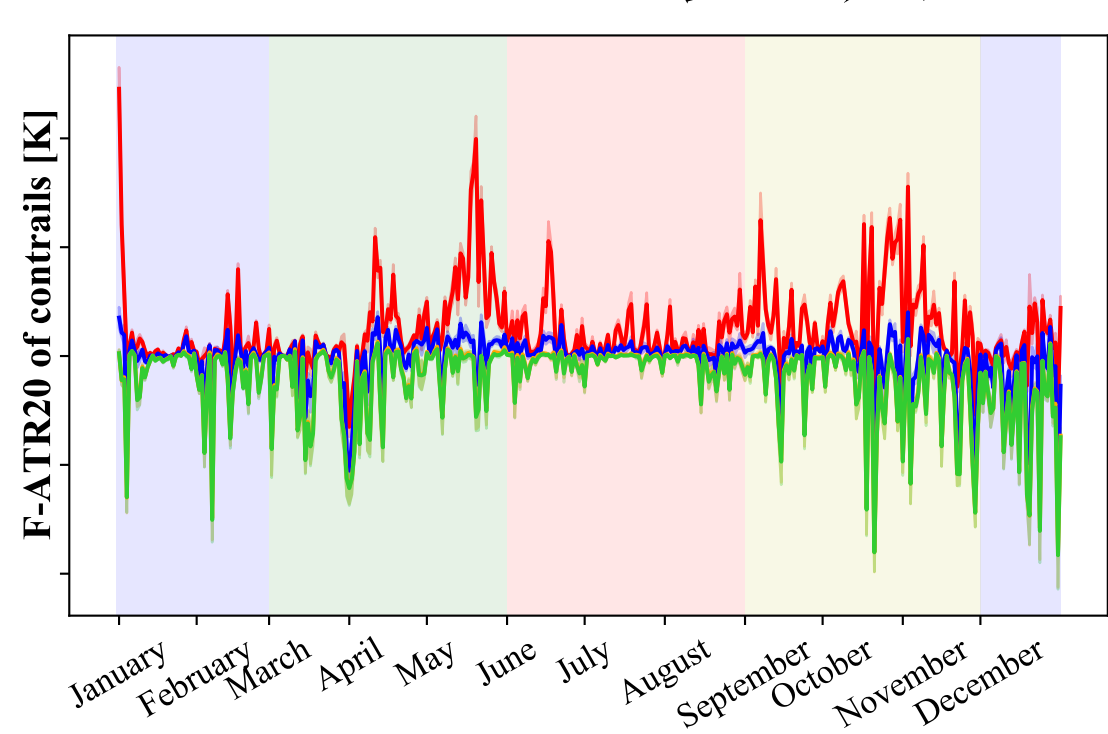

Supplement: Supplementary file 18 [file contrail.pdf › plots_main_paper/contrail.pdf]

# Formation of persistent contrails & climate impact mitigation potential

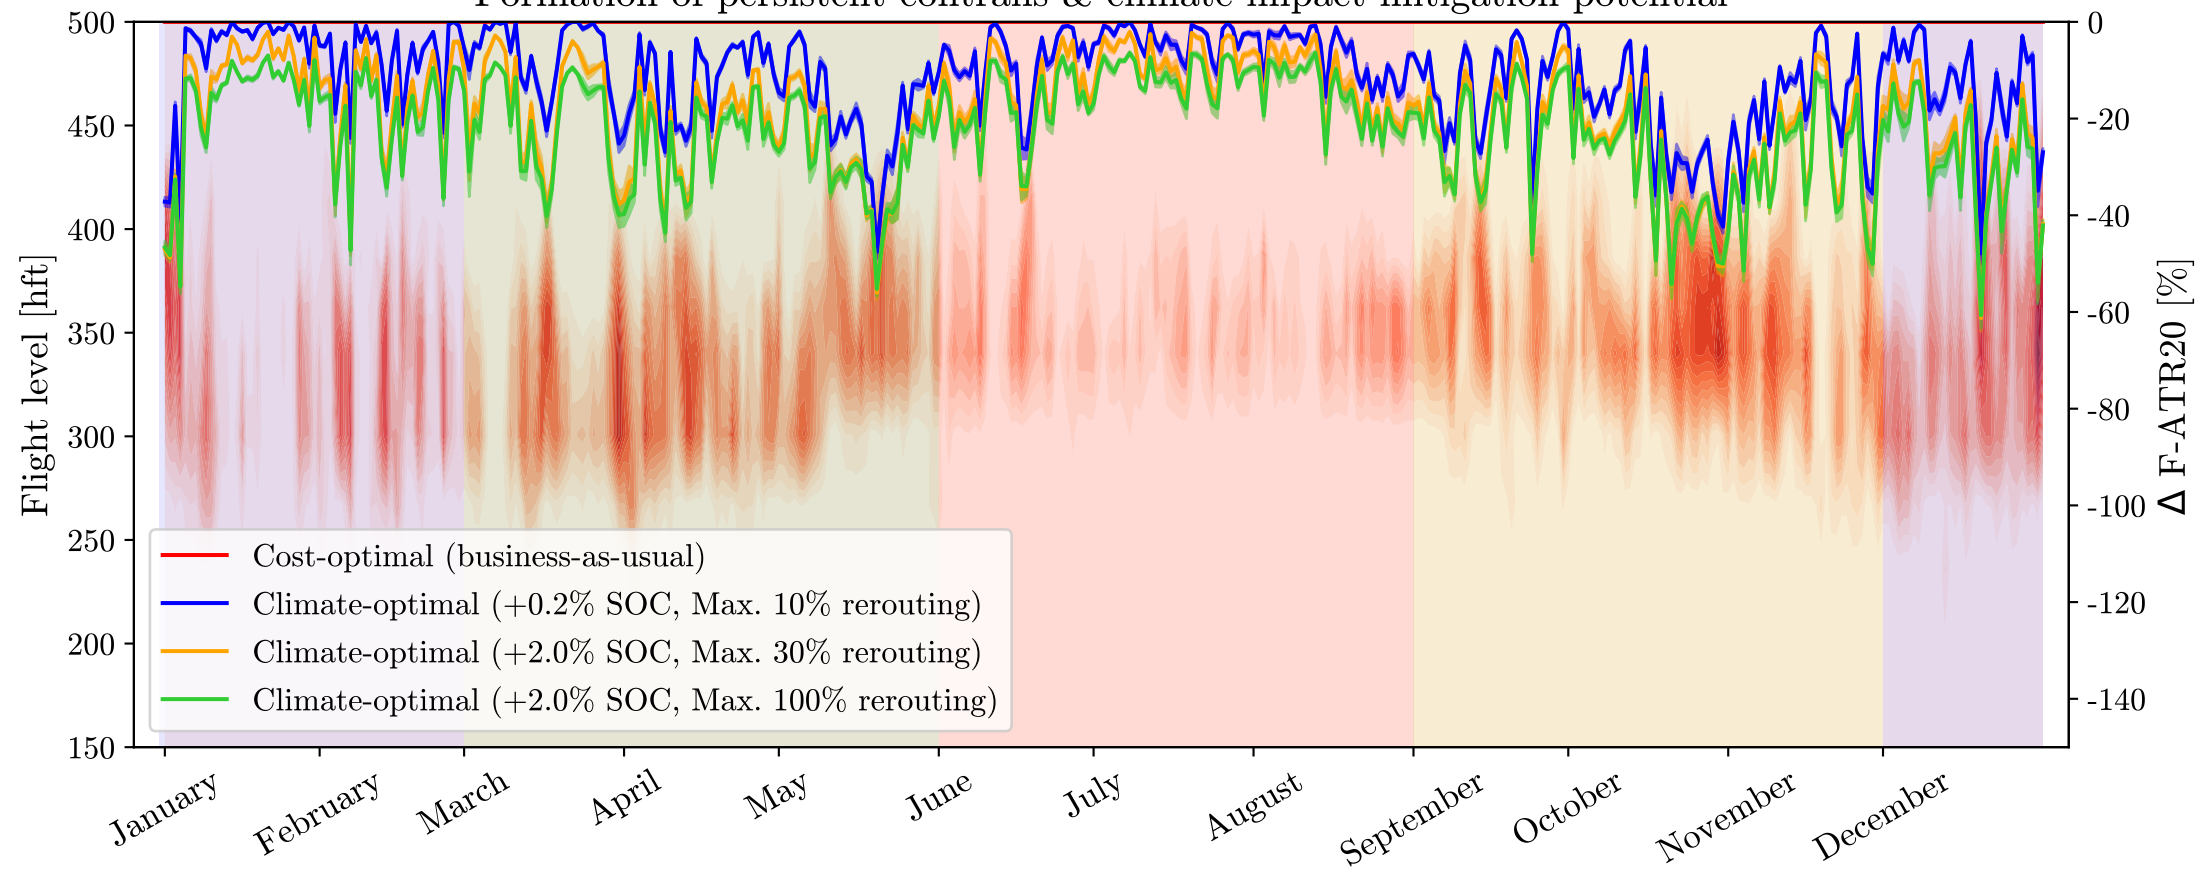

Supplement: Supplementary file 19 [file contrail_mitigation.pdf › plots_main_paper/contrail_mitigation.pdf]

Coverage of cooling contrails & F-ATR20 of contrails

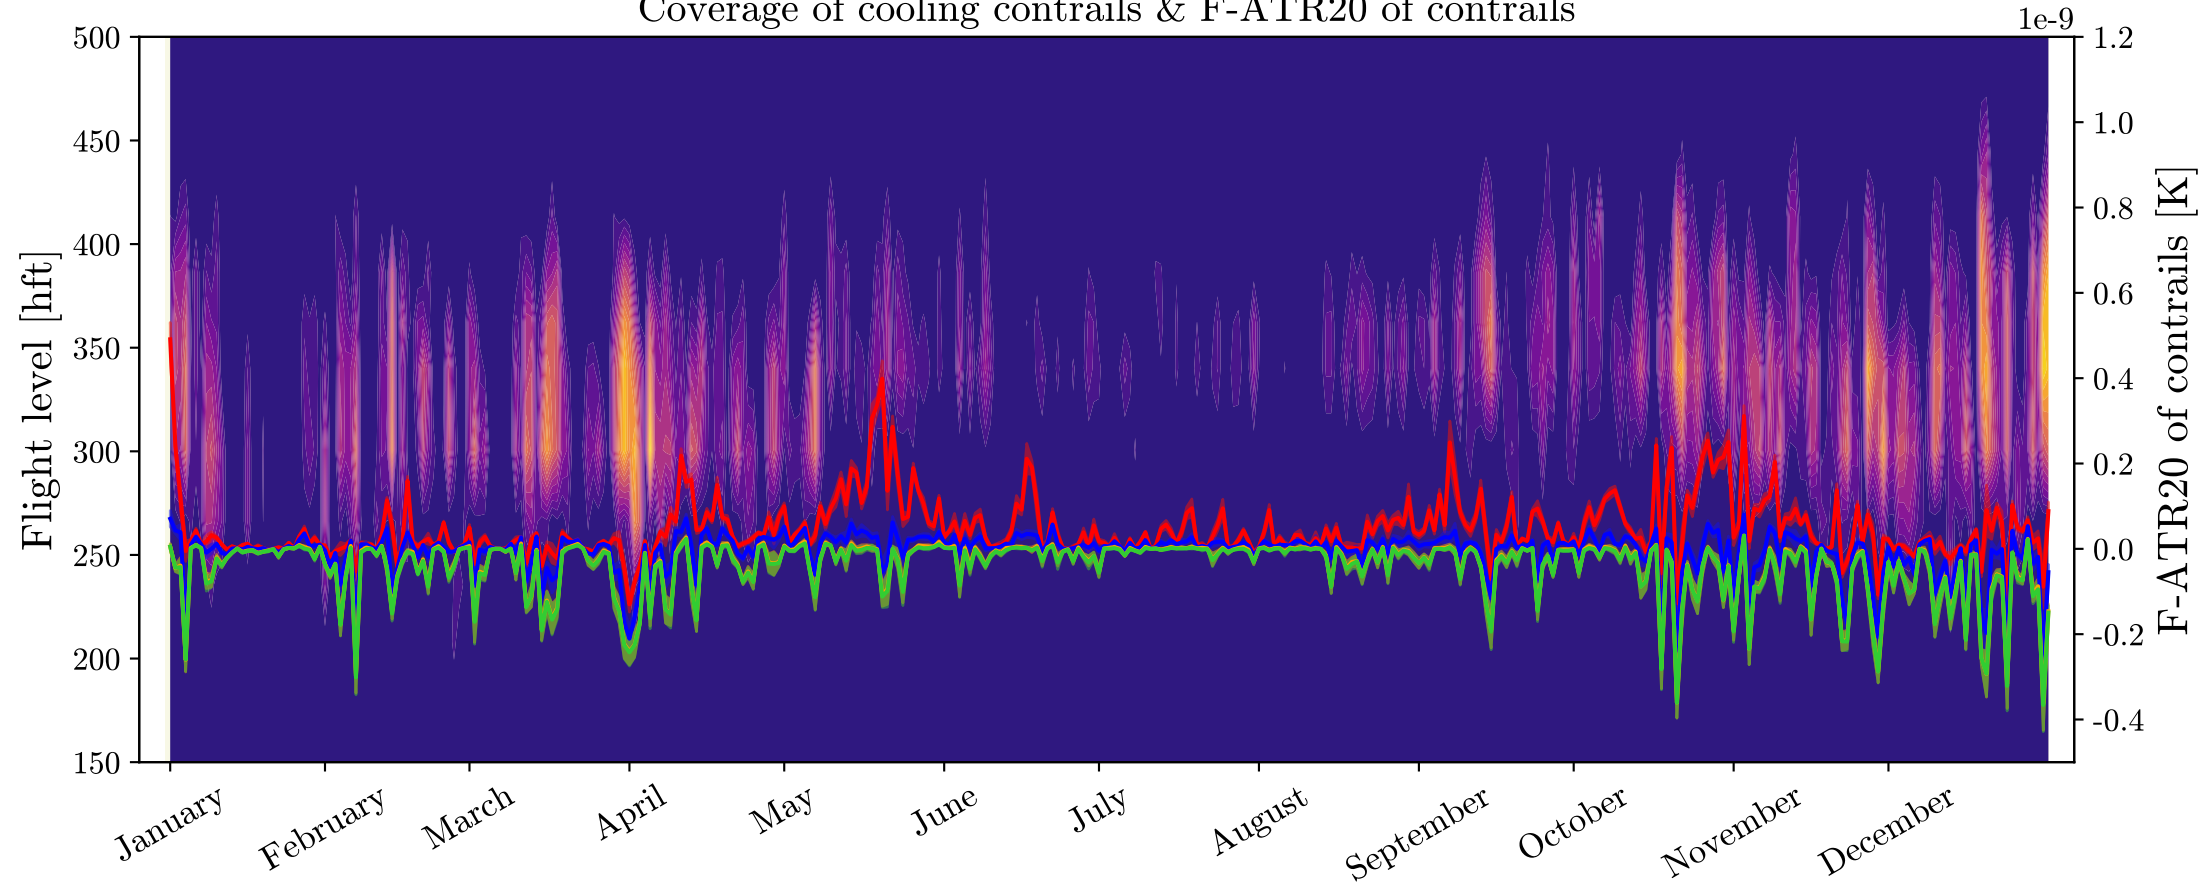

Supplement: Supplementary file 20 [file cooling_contrails_contrail.pdf › plots_main_paper/cooling_contrails_contrail.pdf]

Coverage of cooling contrails & Distances forming persistent contrails

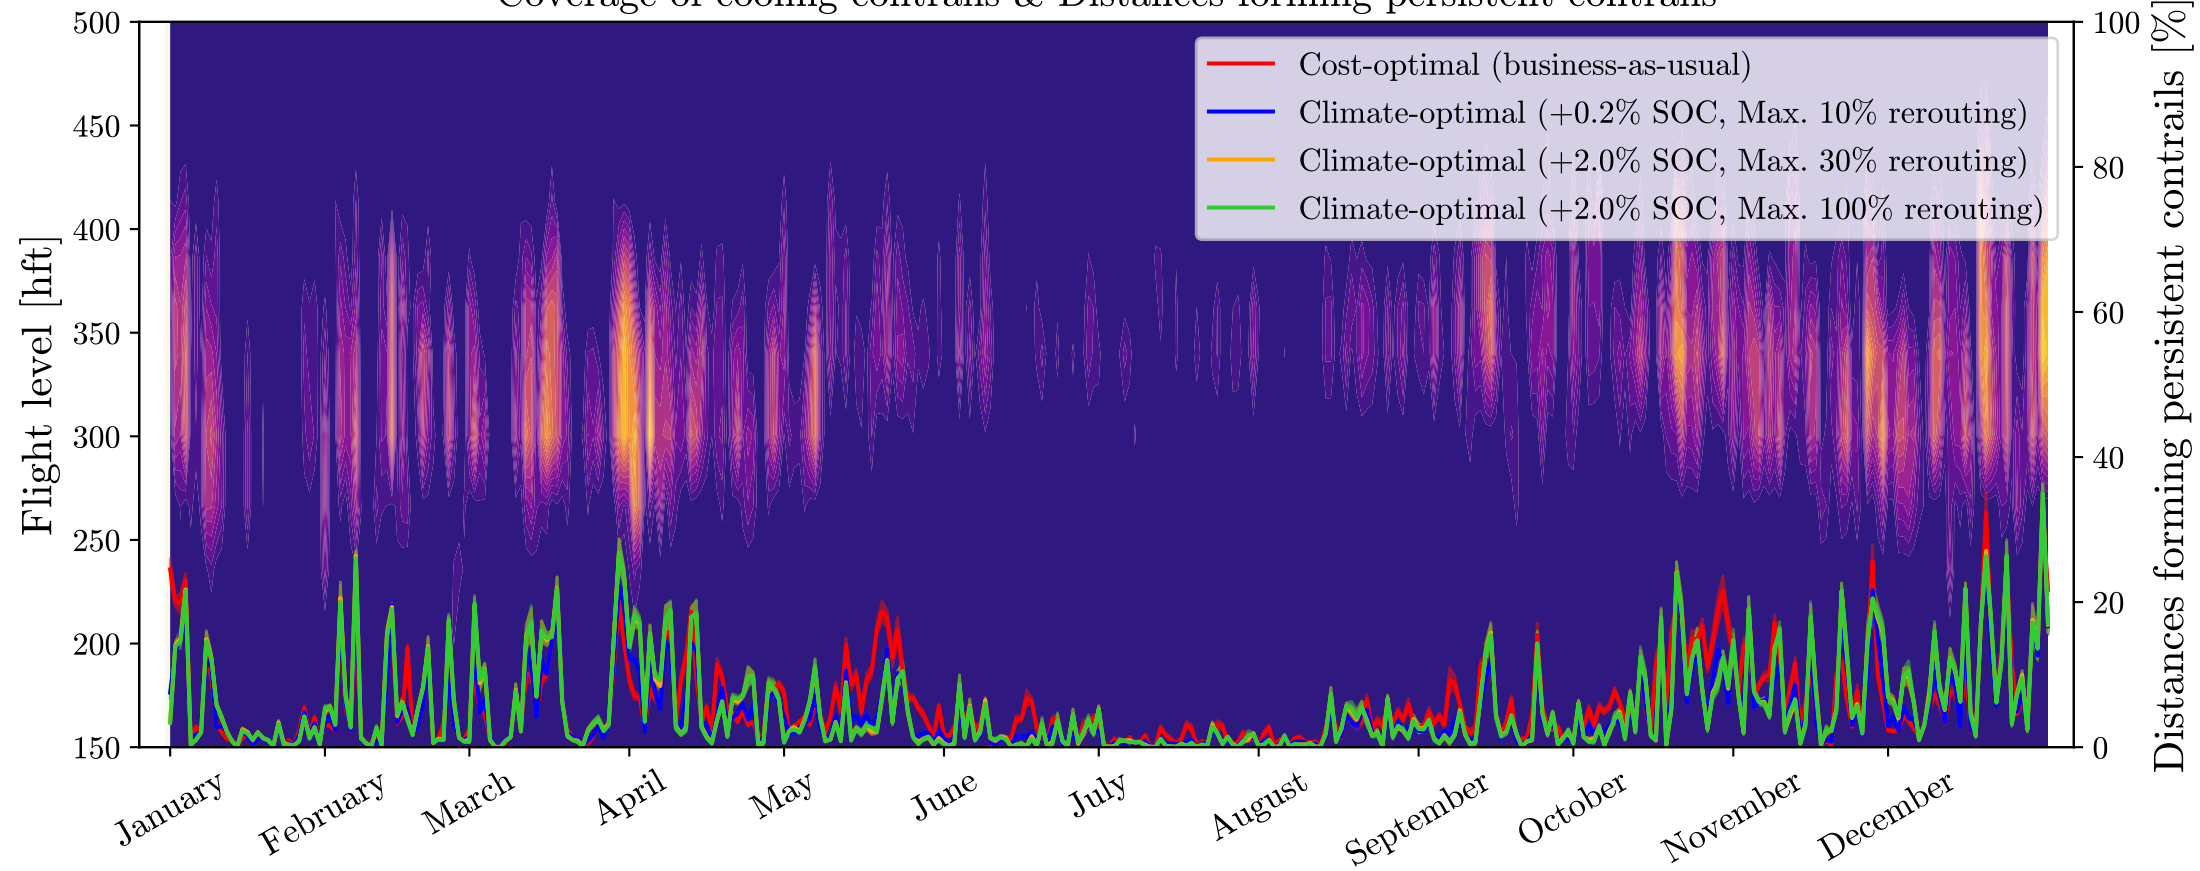

Supplement: Supplementary file 21 [file cooling_contrails_mitigation_potential_contrail_dis.pdf › plots_main_paper/cooling_contrails_mitigation_potential_contrail_dis.pdf]

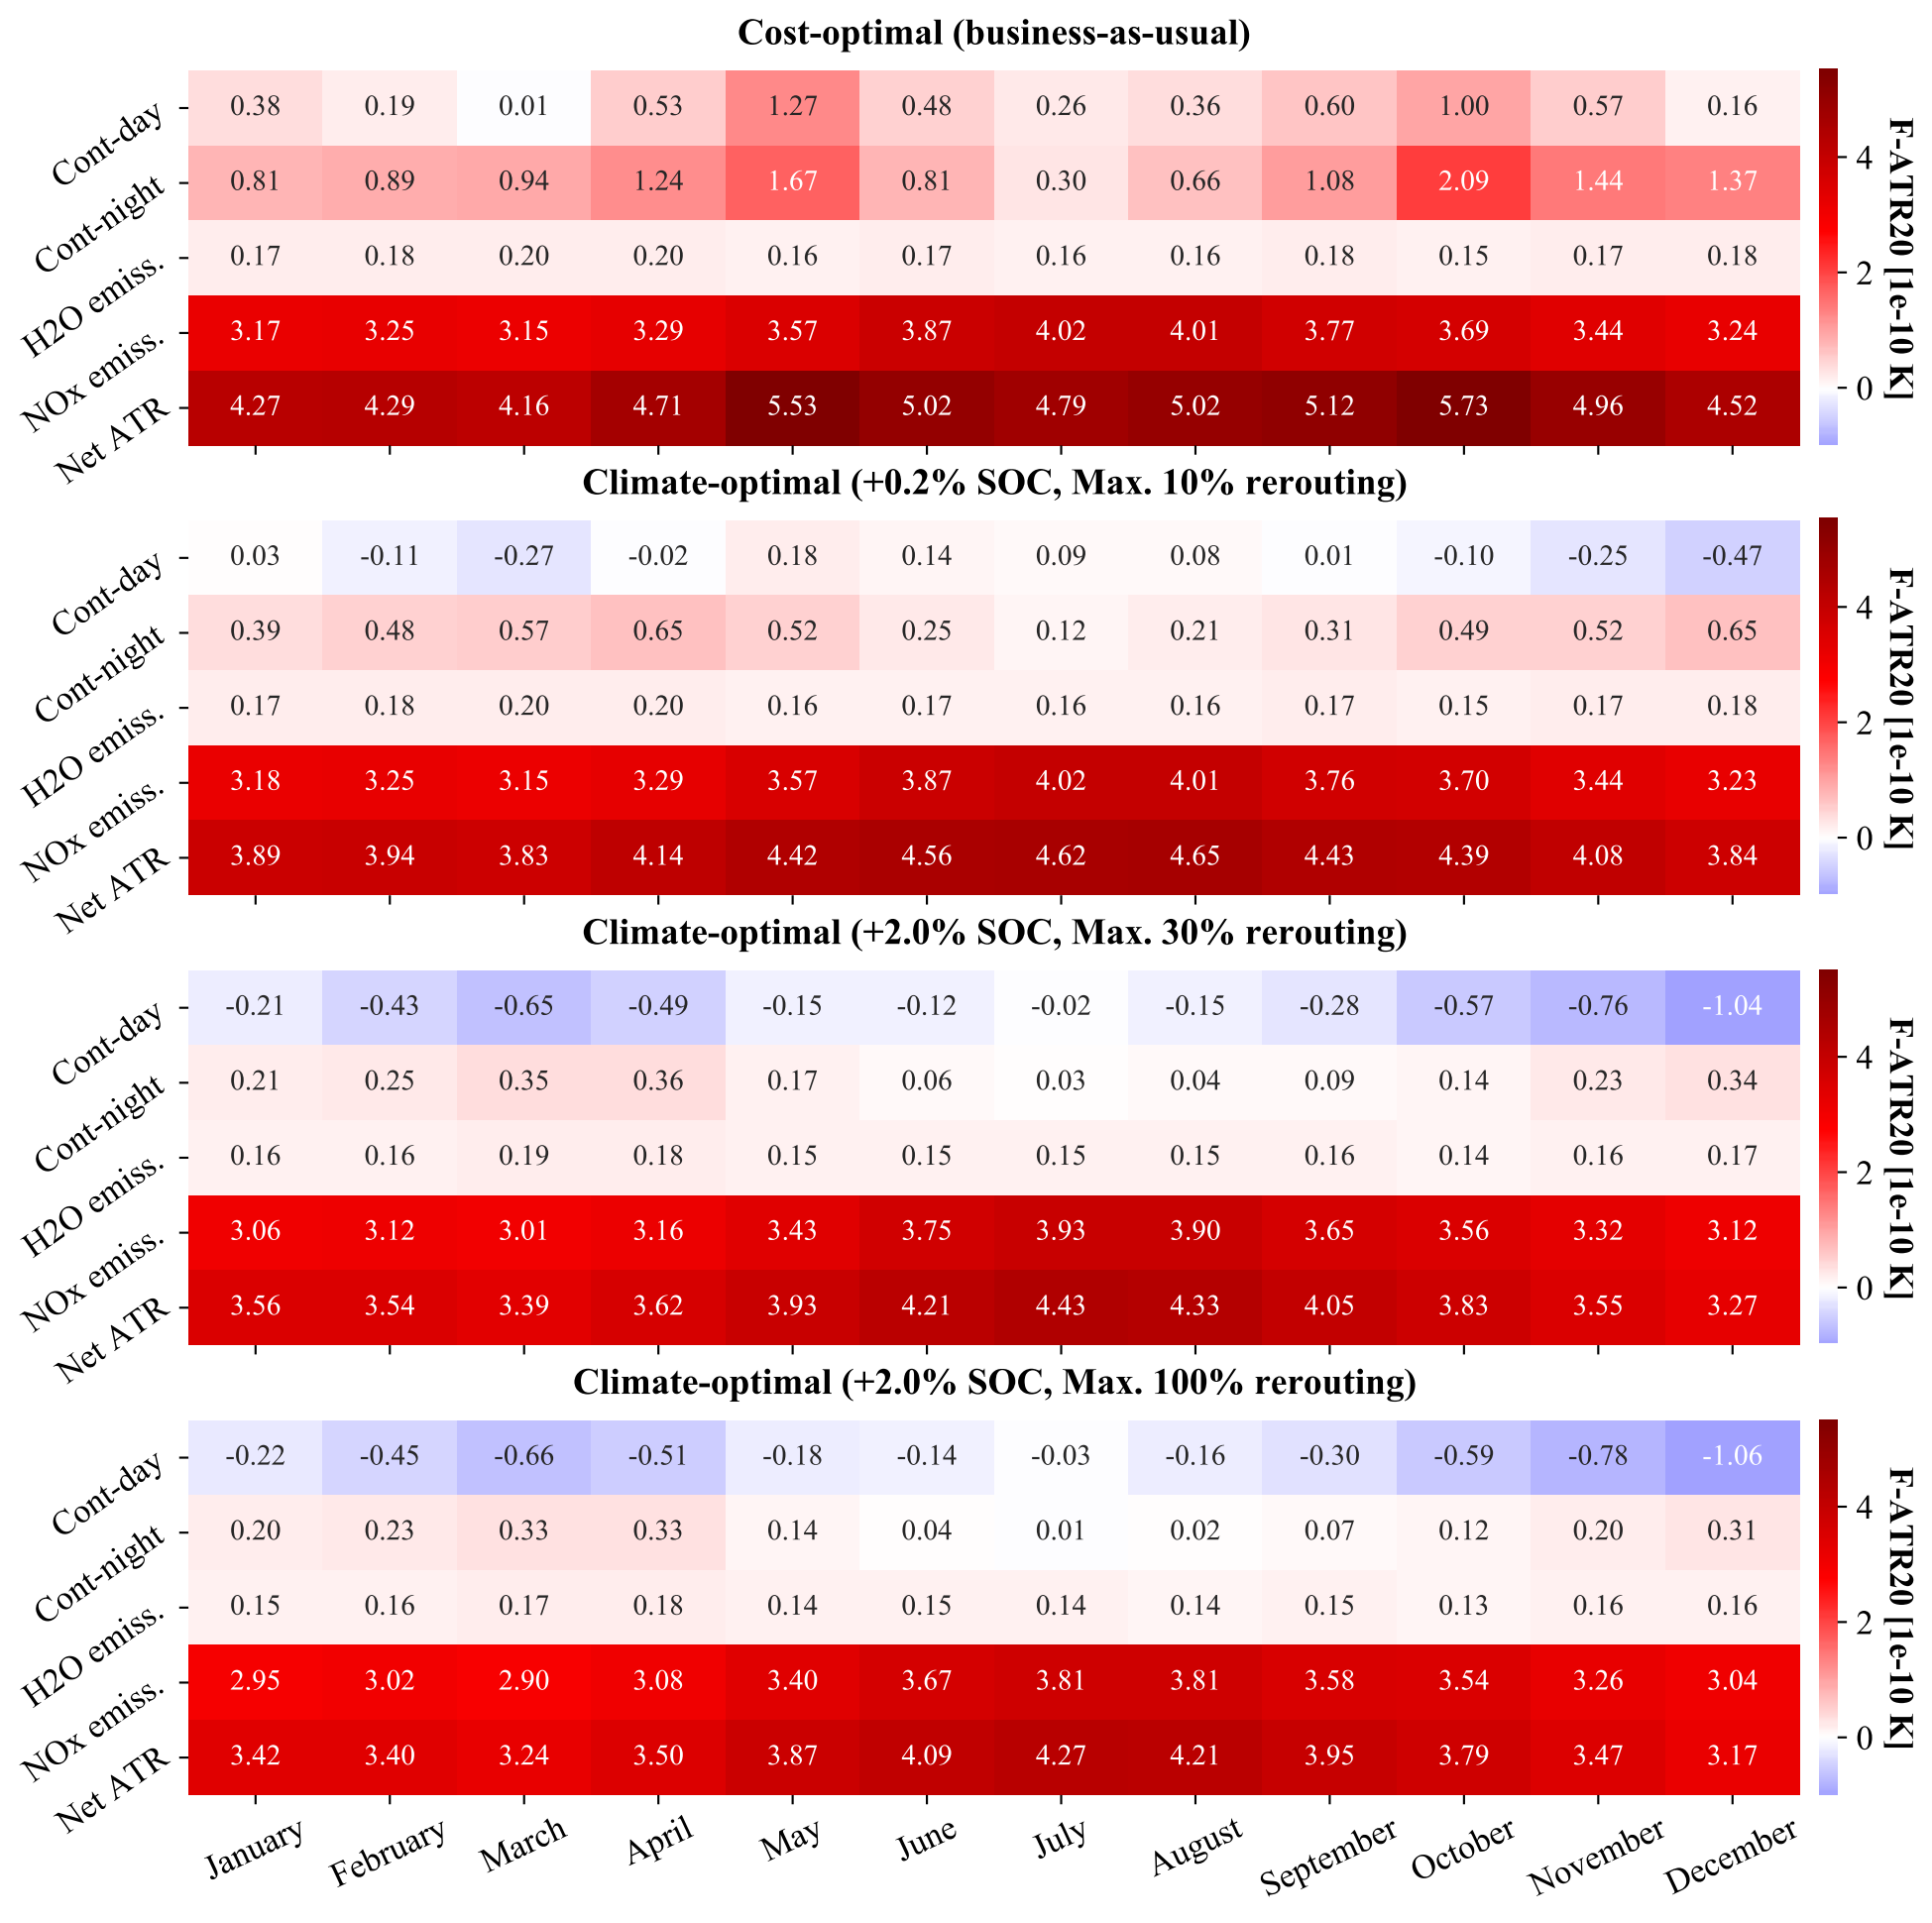

Supplement: Supplementary file 22 [file cost_opt.pdf › plots_main_paper/cost_opt.pdf]

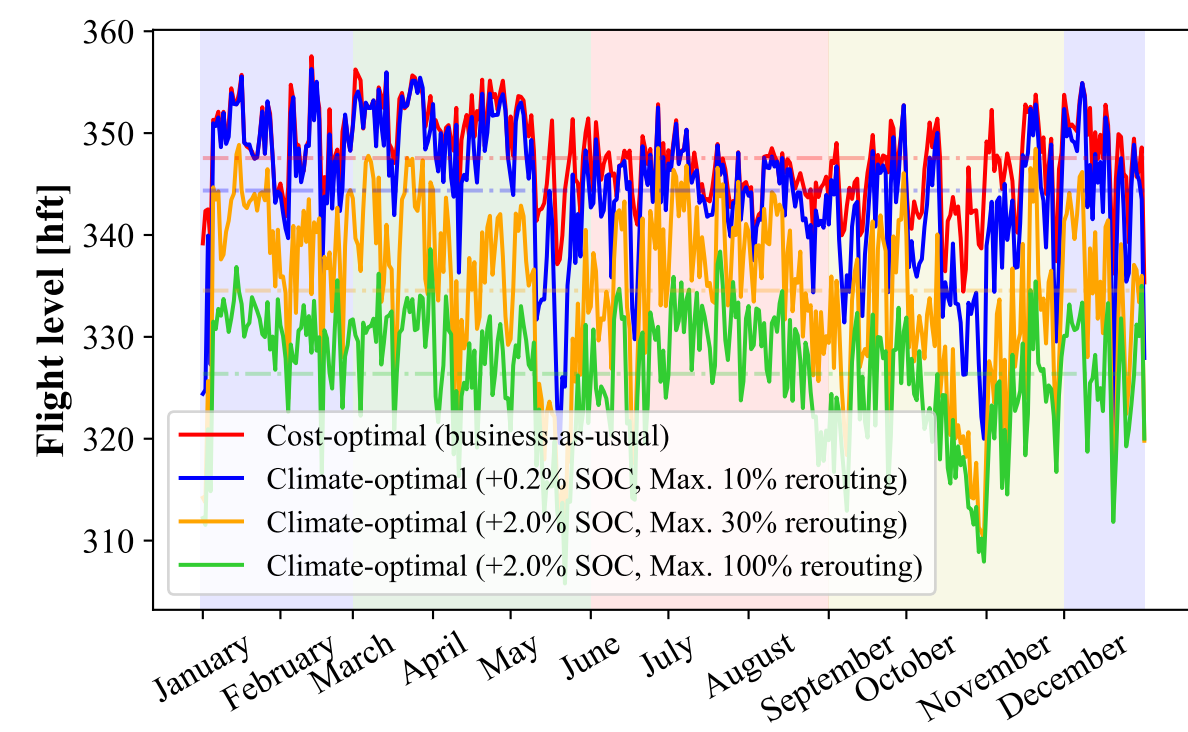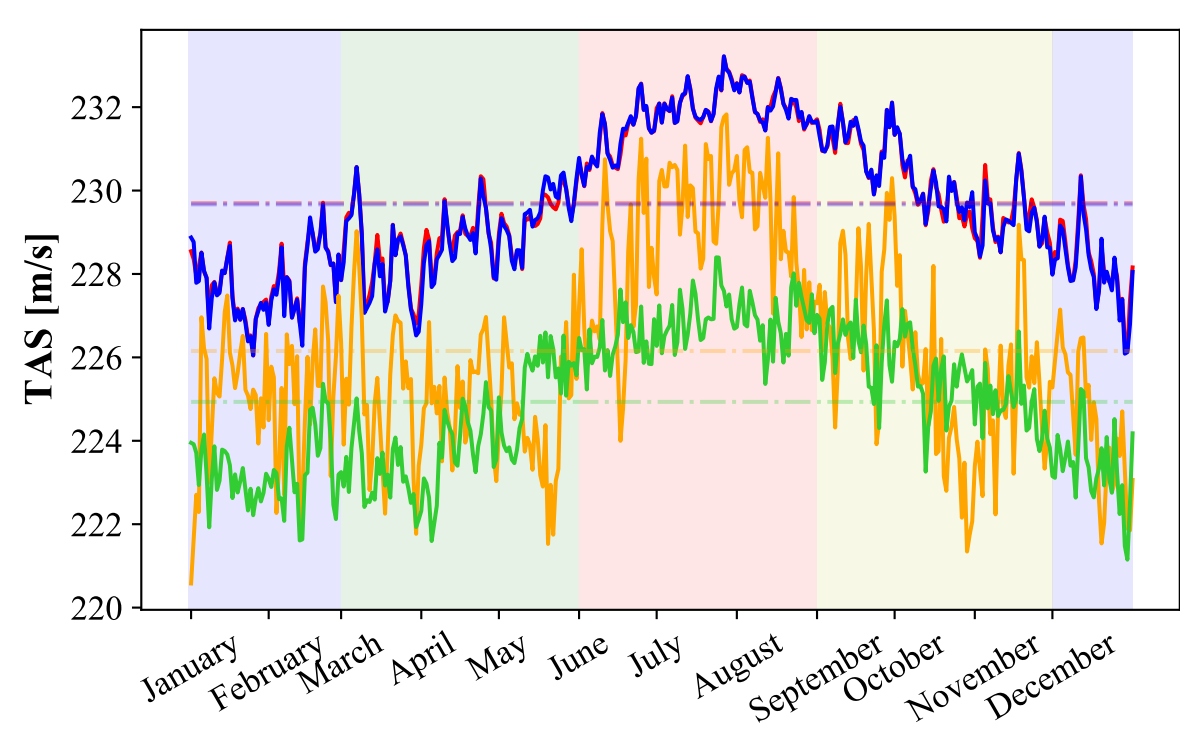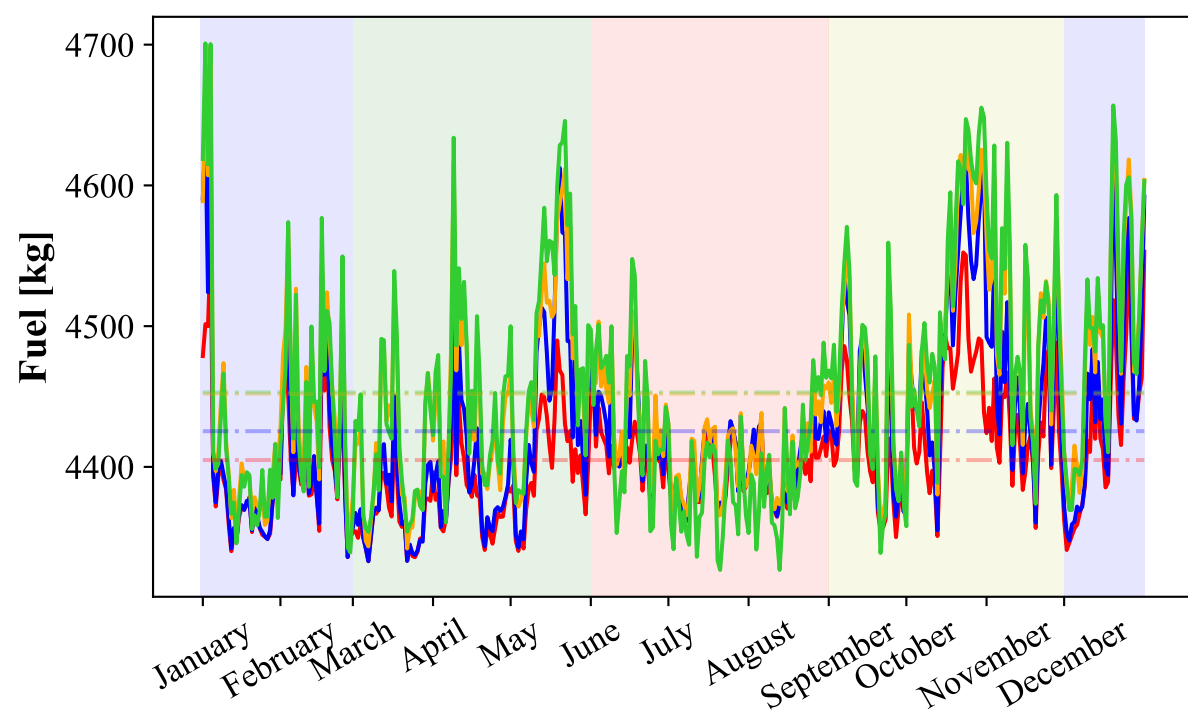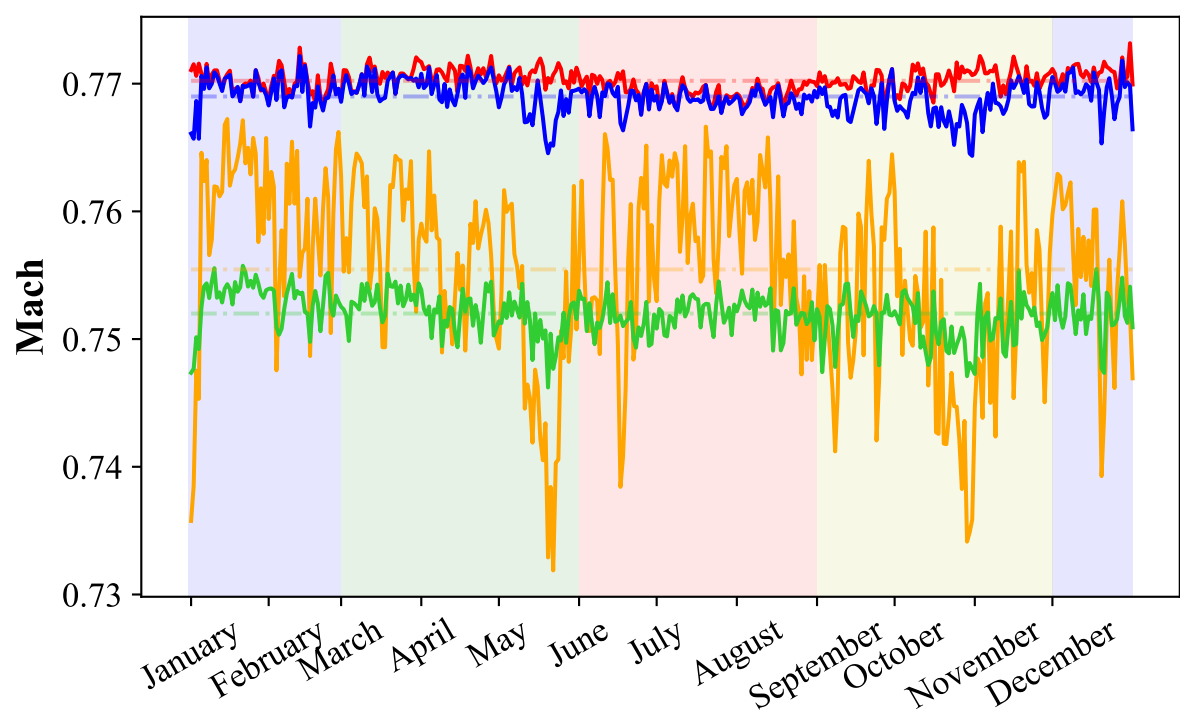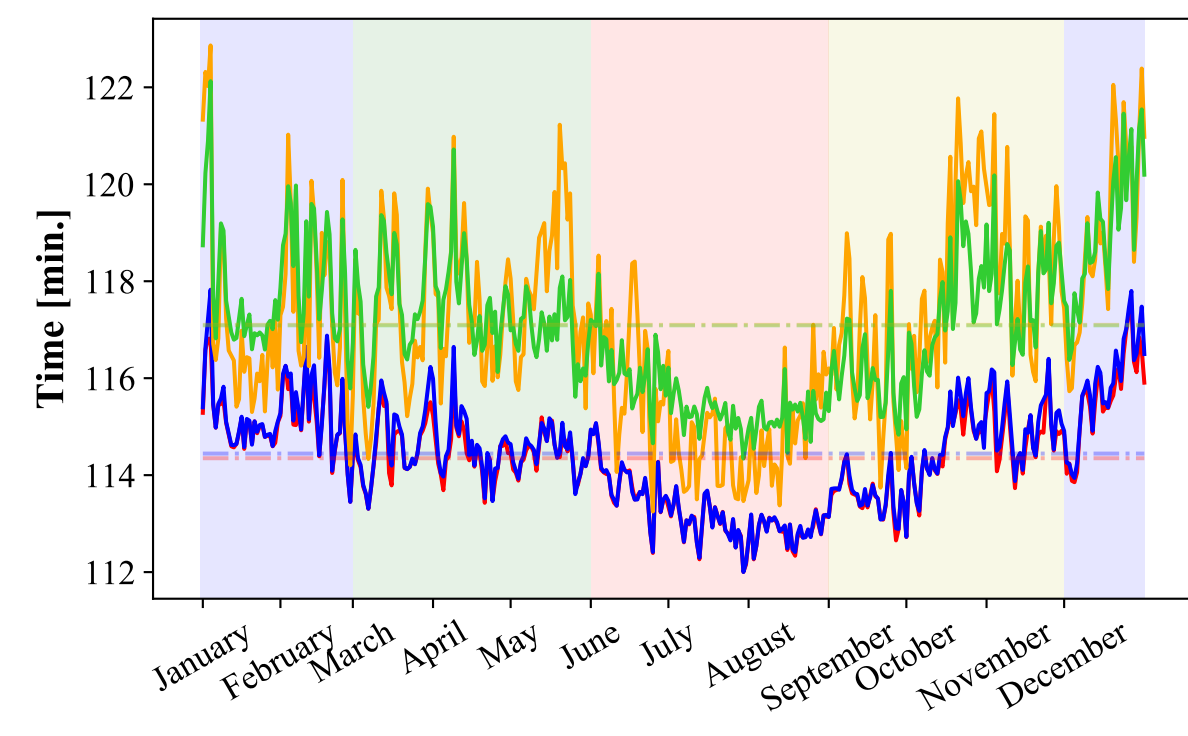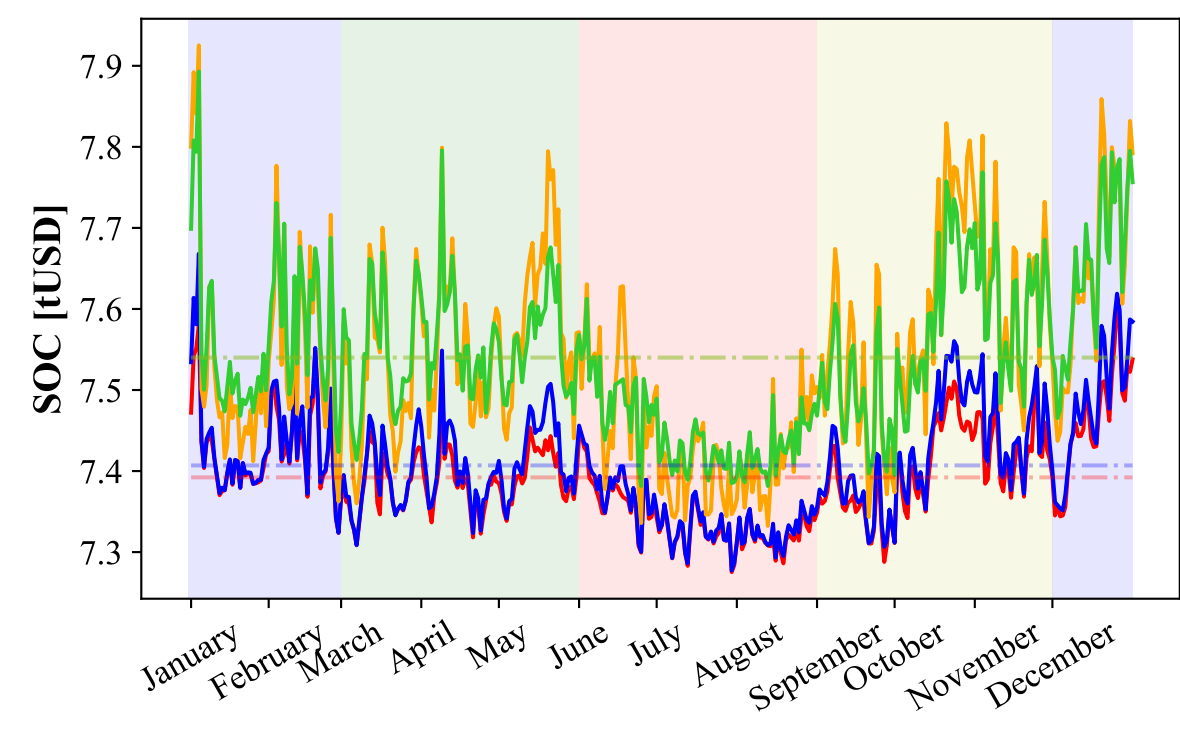

Supplement: Supplementary file 23 [file cost_related_3.pdf › plots_main_paper/cost_related_3.pdf]

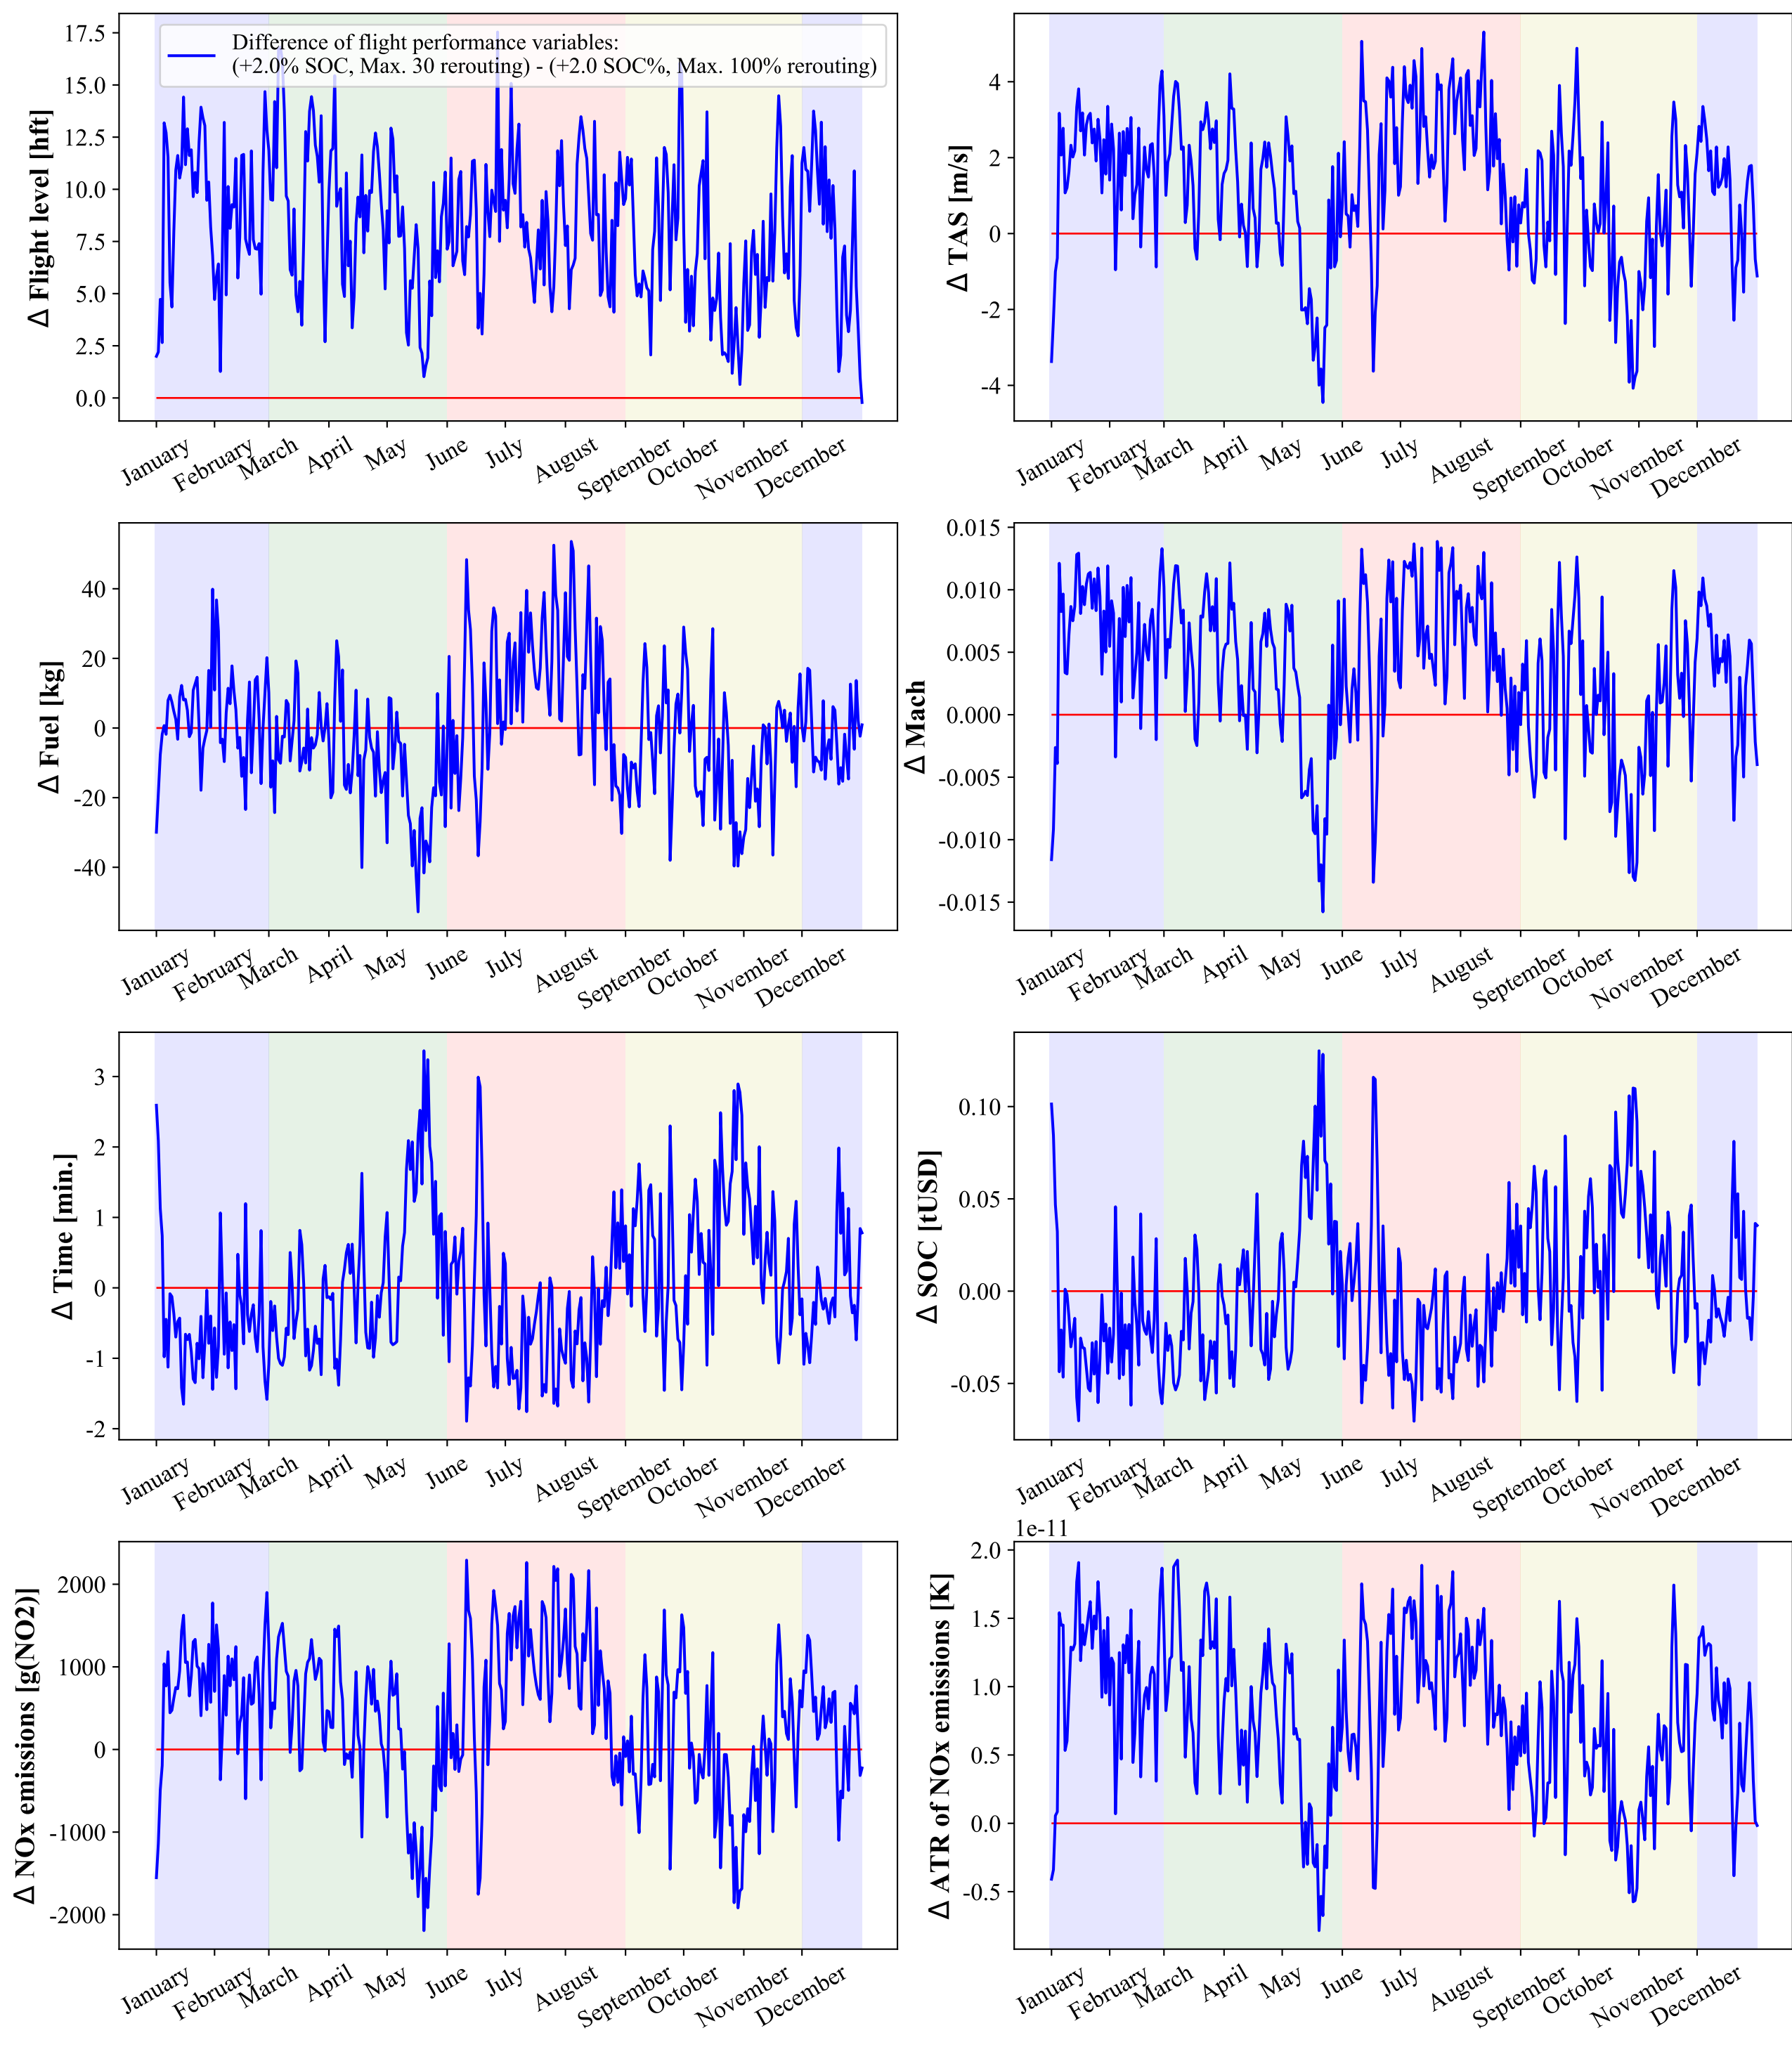

Supplement: Supplementary file 24 [file difference_flight__profiles.pdf › plots_main_paper/difference_flight__profiles.pdf]

Sensitivity Analysis: Contrails Forcing Efficacies (Climate-optimal w.r.t. +2.0 SOC & Max. 30% rerouting)

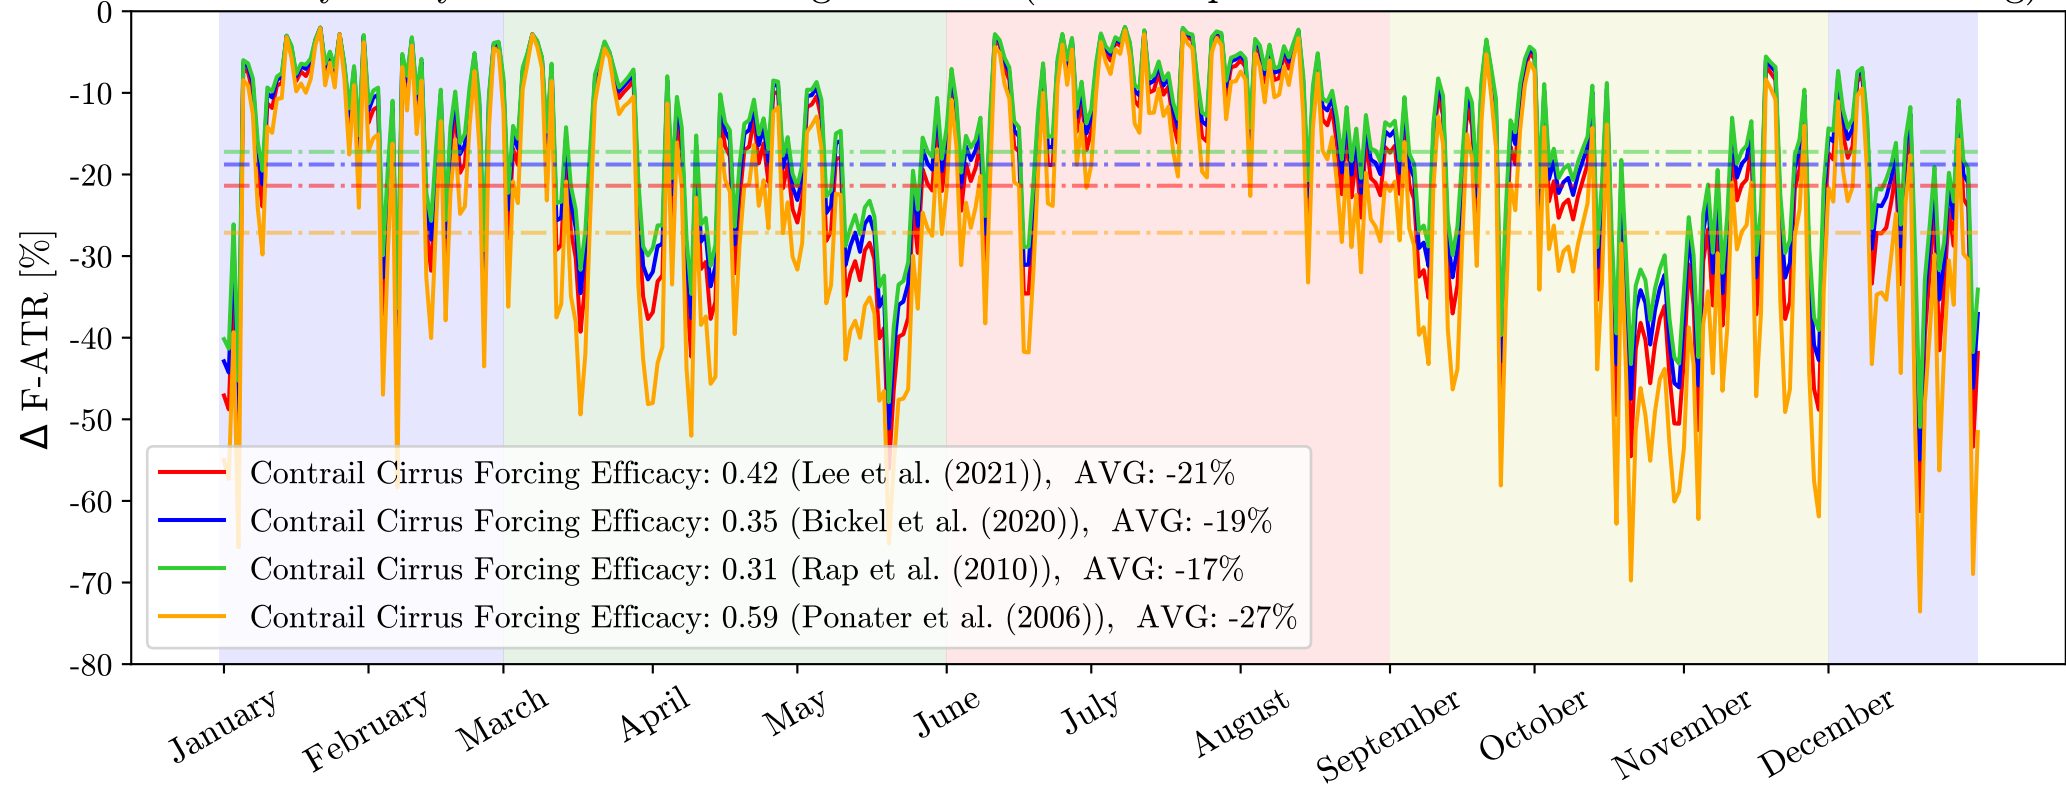

Supplement: Supplementary file 25 [file efficacy_2.pdf › plots_main_paper/efficacy_2.pdf]

Climate Impact over the next 100 years

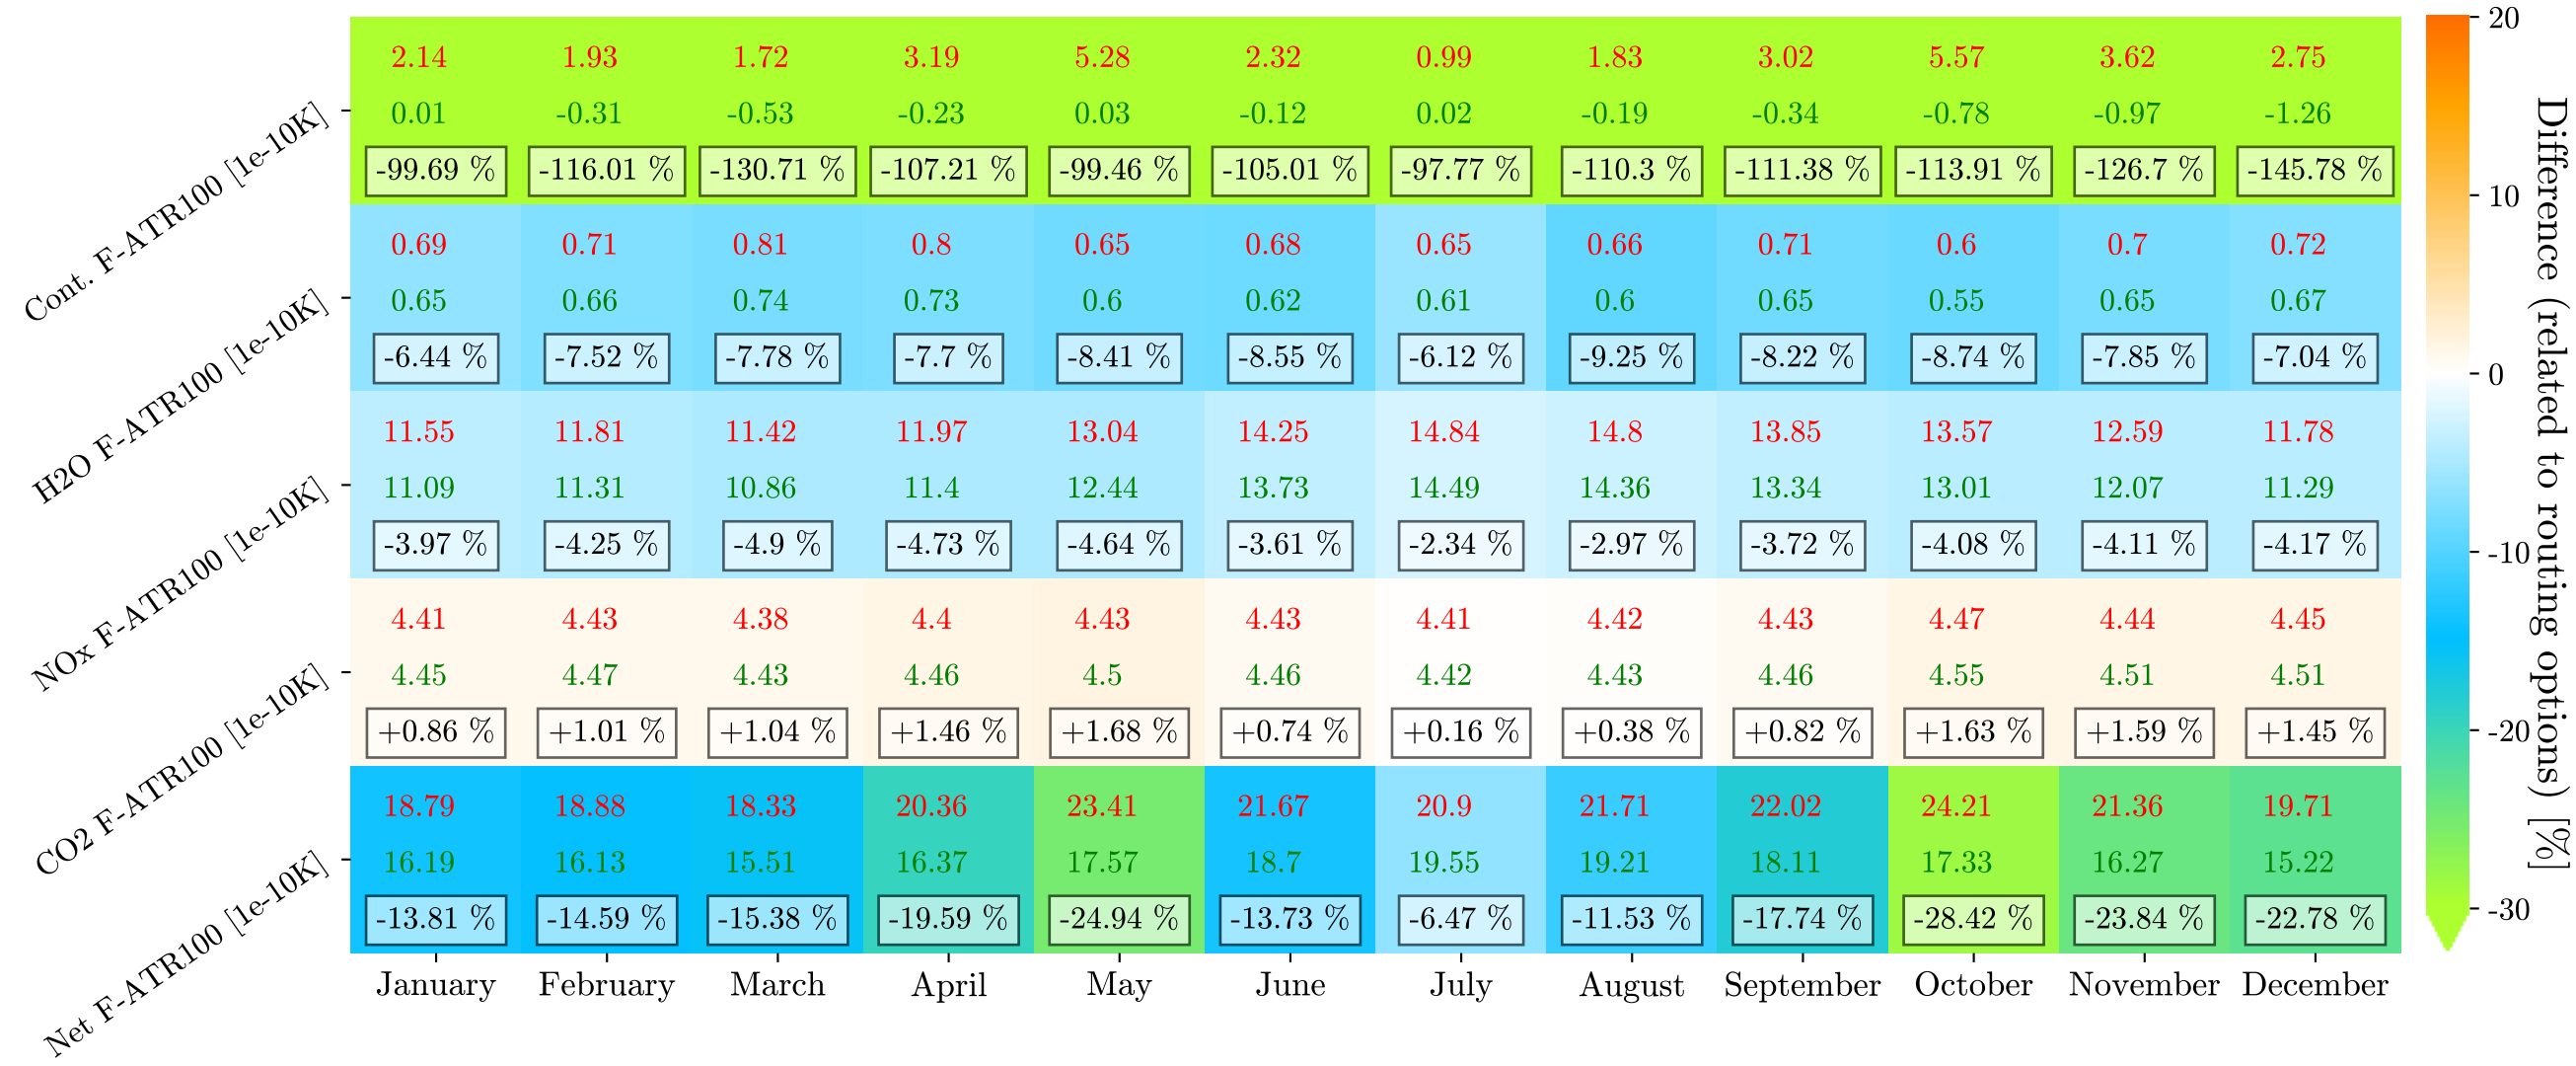

Supplement: Supplementary file 26 [file heat_map_climate_impact_atr100.pdf › plots_main_paper/heat_map_climate_impact_atr100.pdf]

Climate Impact over the next 20 years

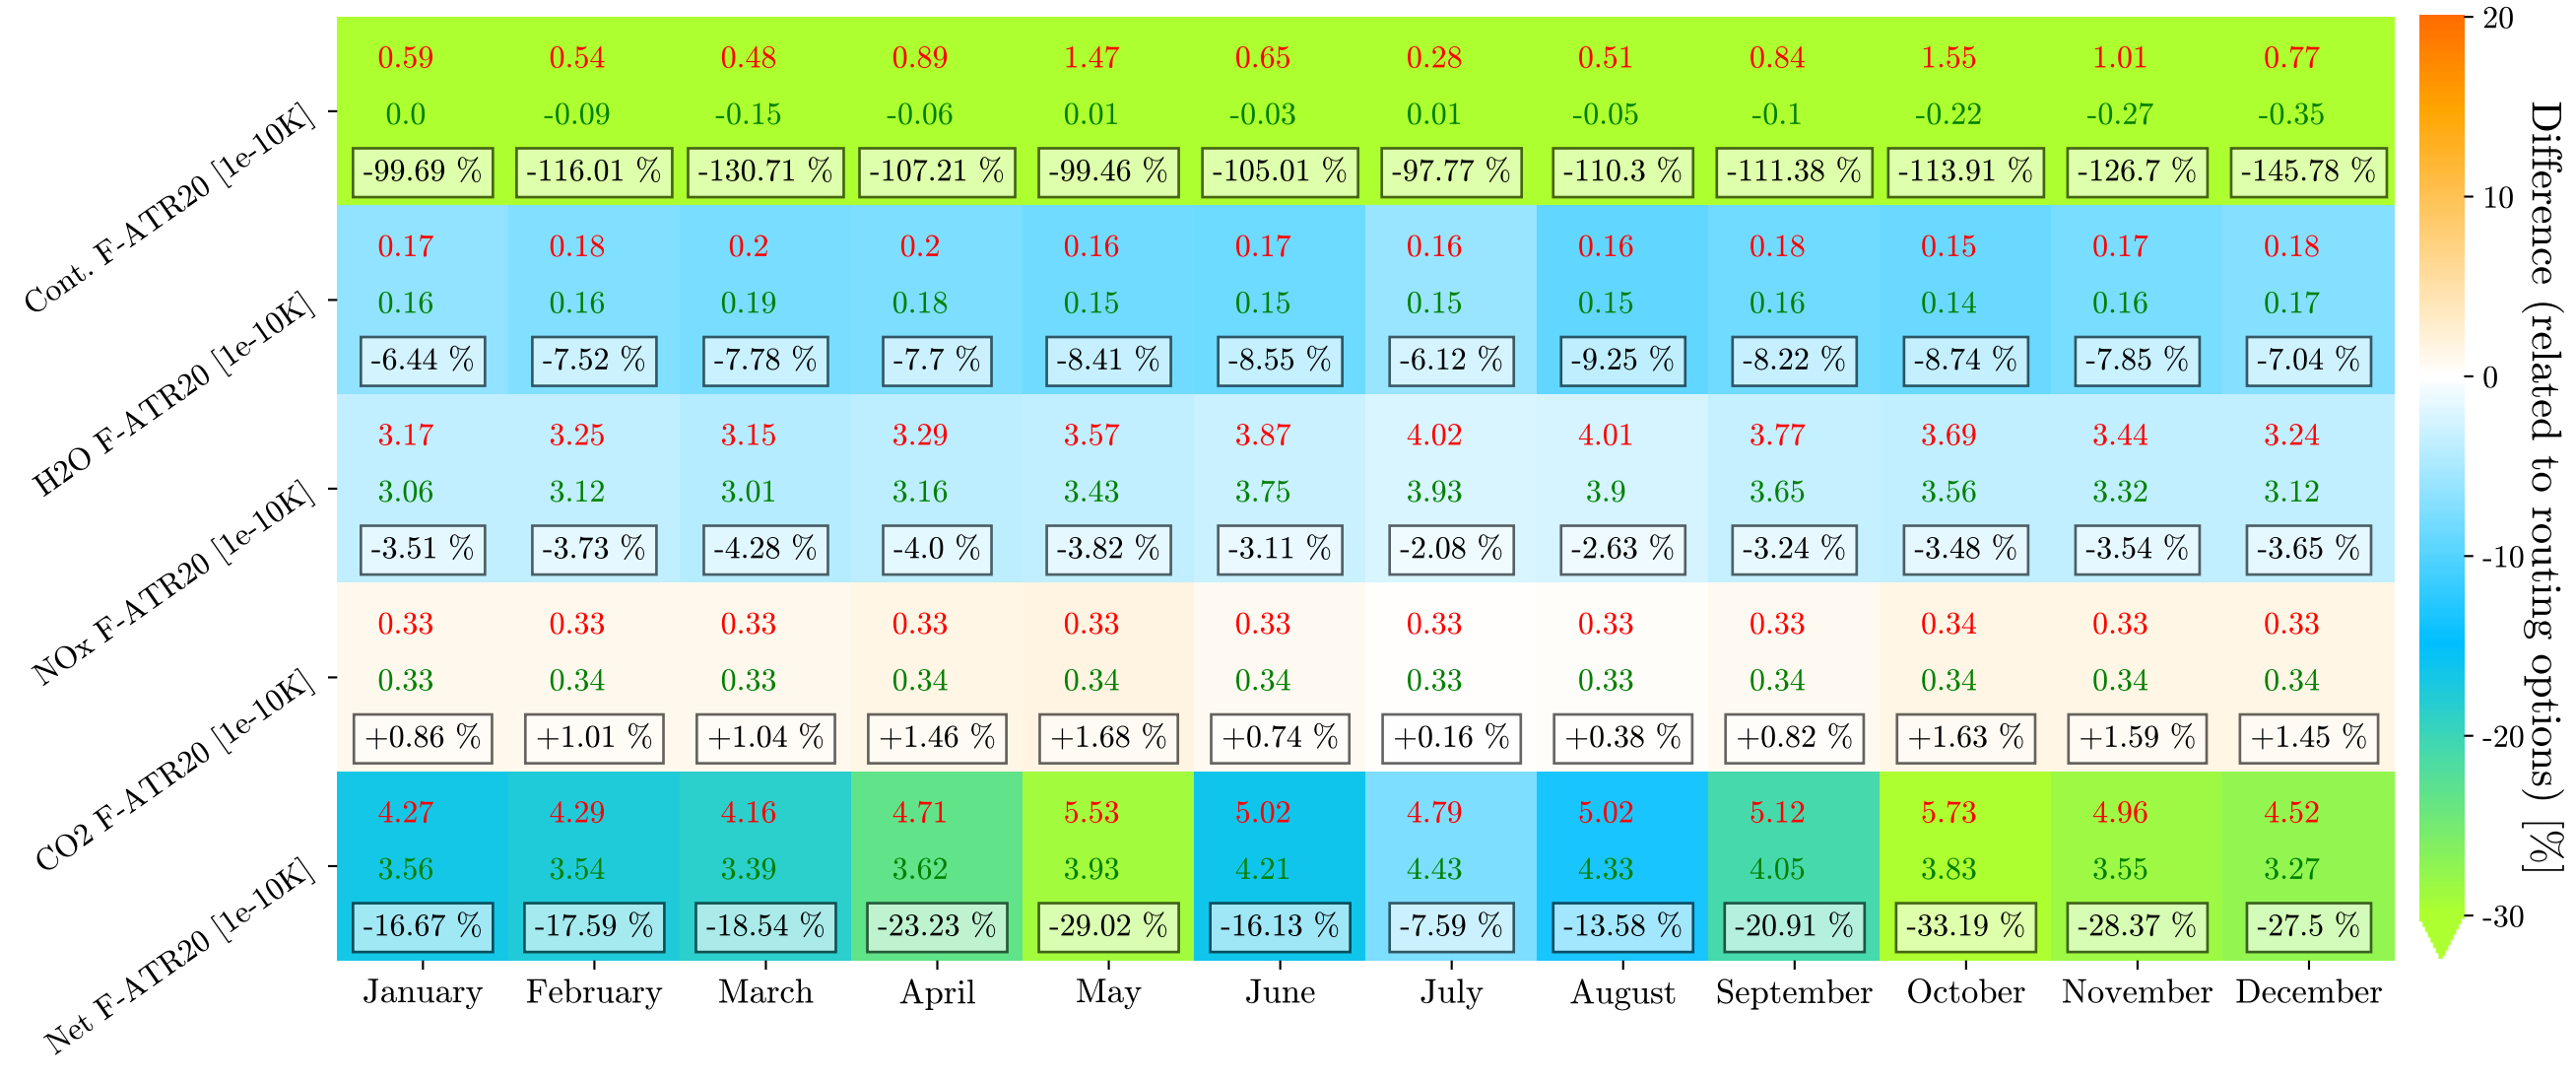

Supplement: Supplementary file 27 [file heat_map_climate_impact_atr20.pdf › plots_main_paper/heat_map_climate_impact_atr20.pdf]

Contrail properties

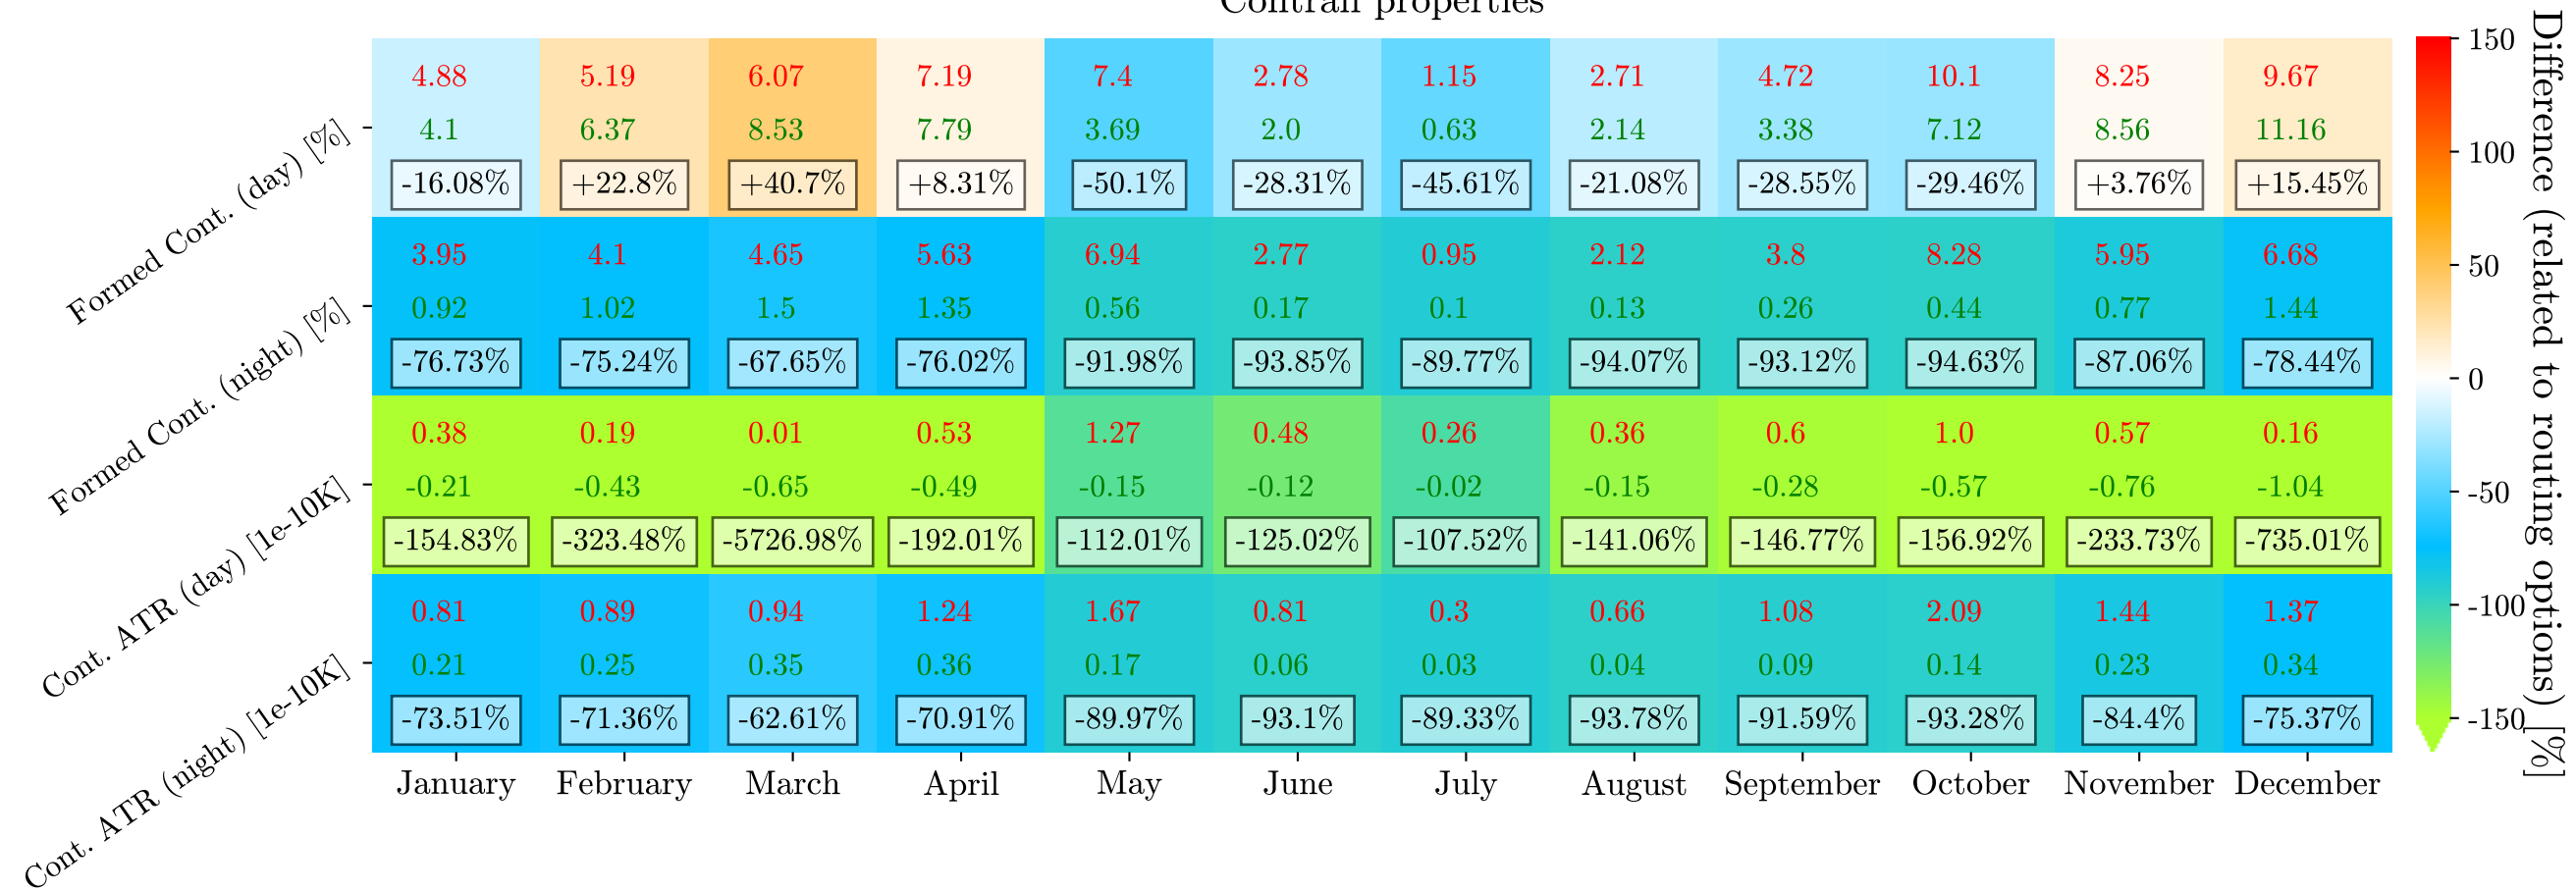

Supplement: Supplementary file 28 [file heat_map_contrails.pdf › plots_main_paper/heat_map_contrails.pdf]

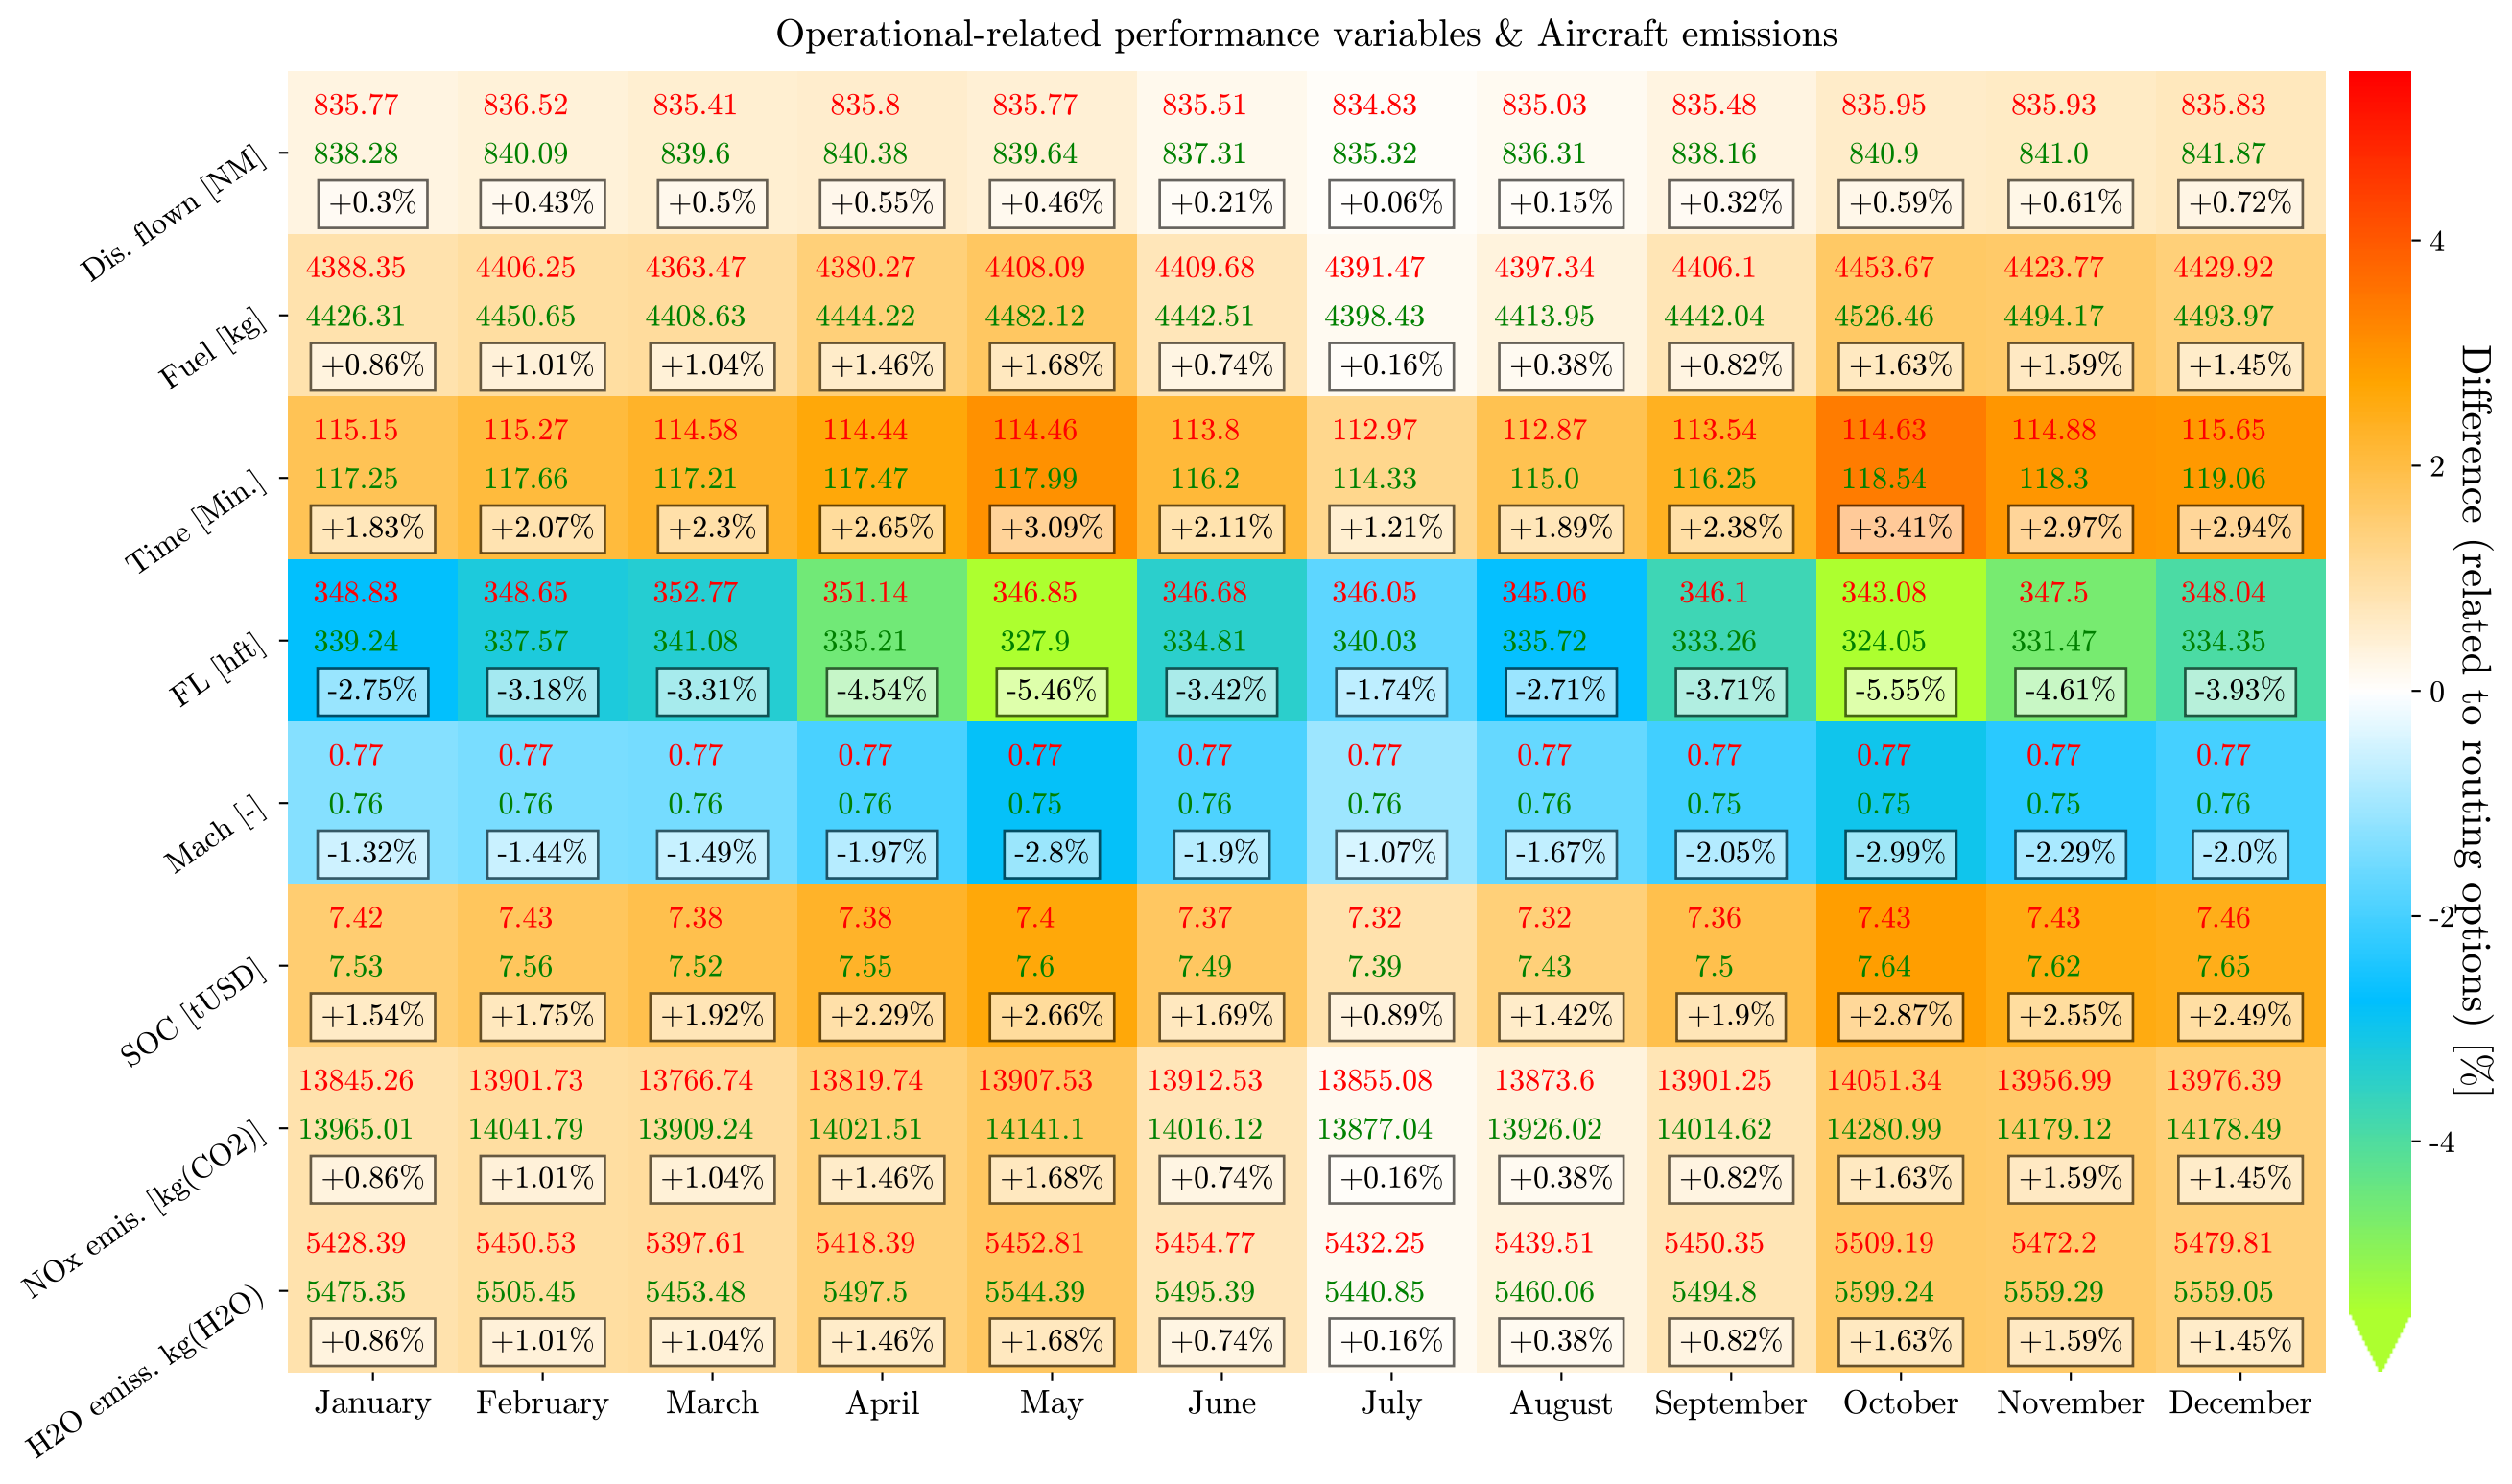

Supplement: Supplementary file 29 [file heat_map_operational.pdf › plots_main_paper/heat_map_operational.pdf]

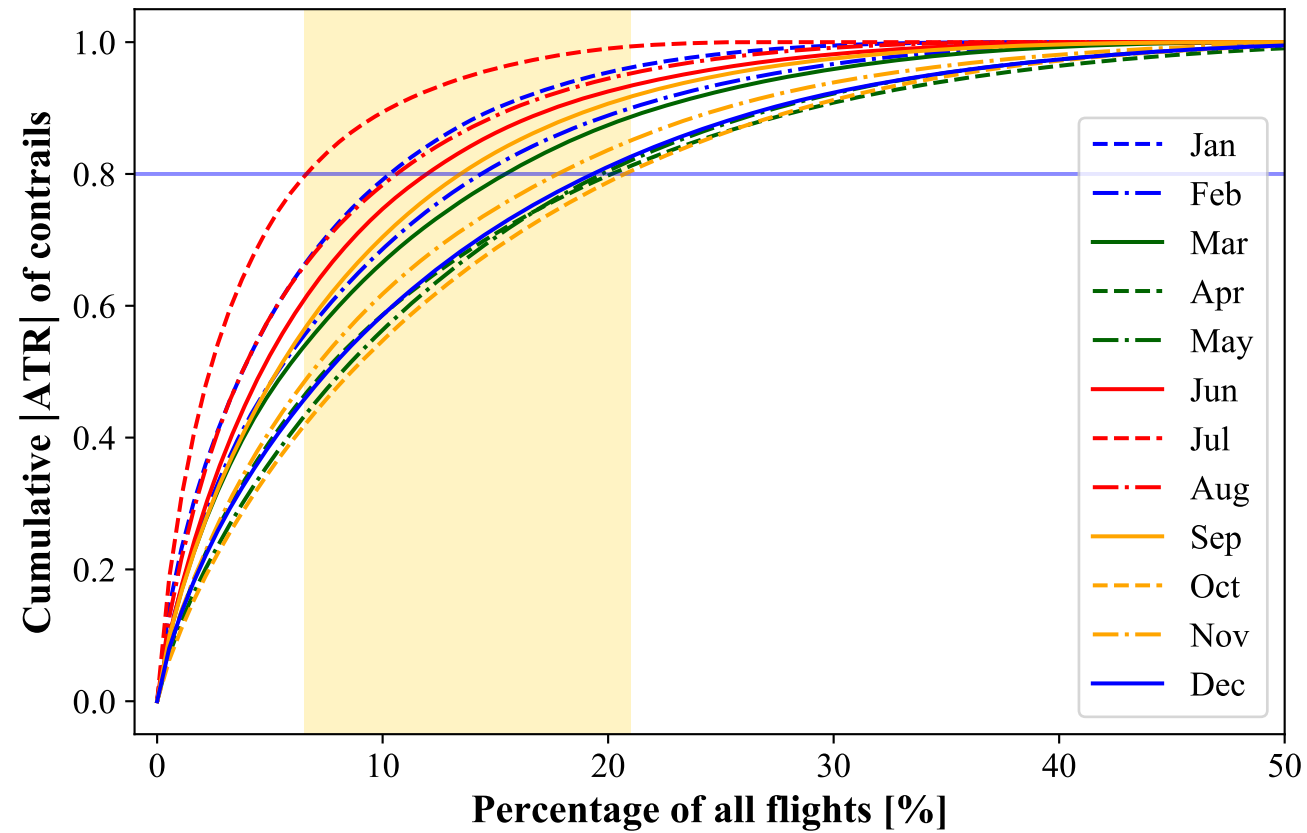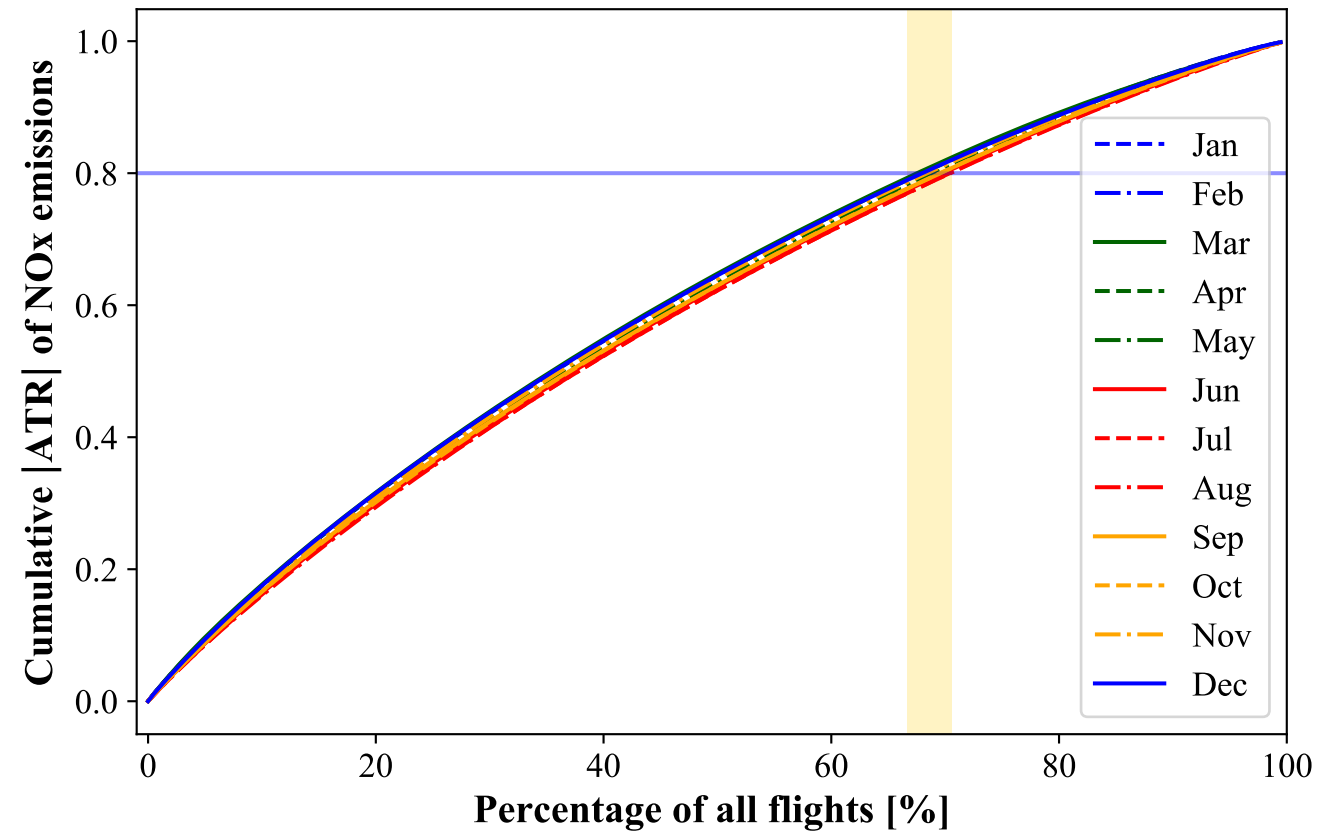

Supplement: Supplementary file 30 [file percentage_AIC_2.pdf › plots_main_paper/percentage_AIC_2.pdf]

**Percentage of Flights Deviated from Cost-Optimal Trajectories**

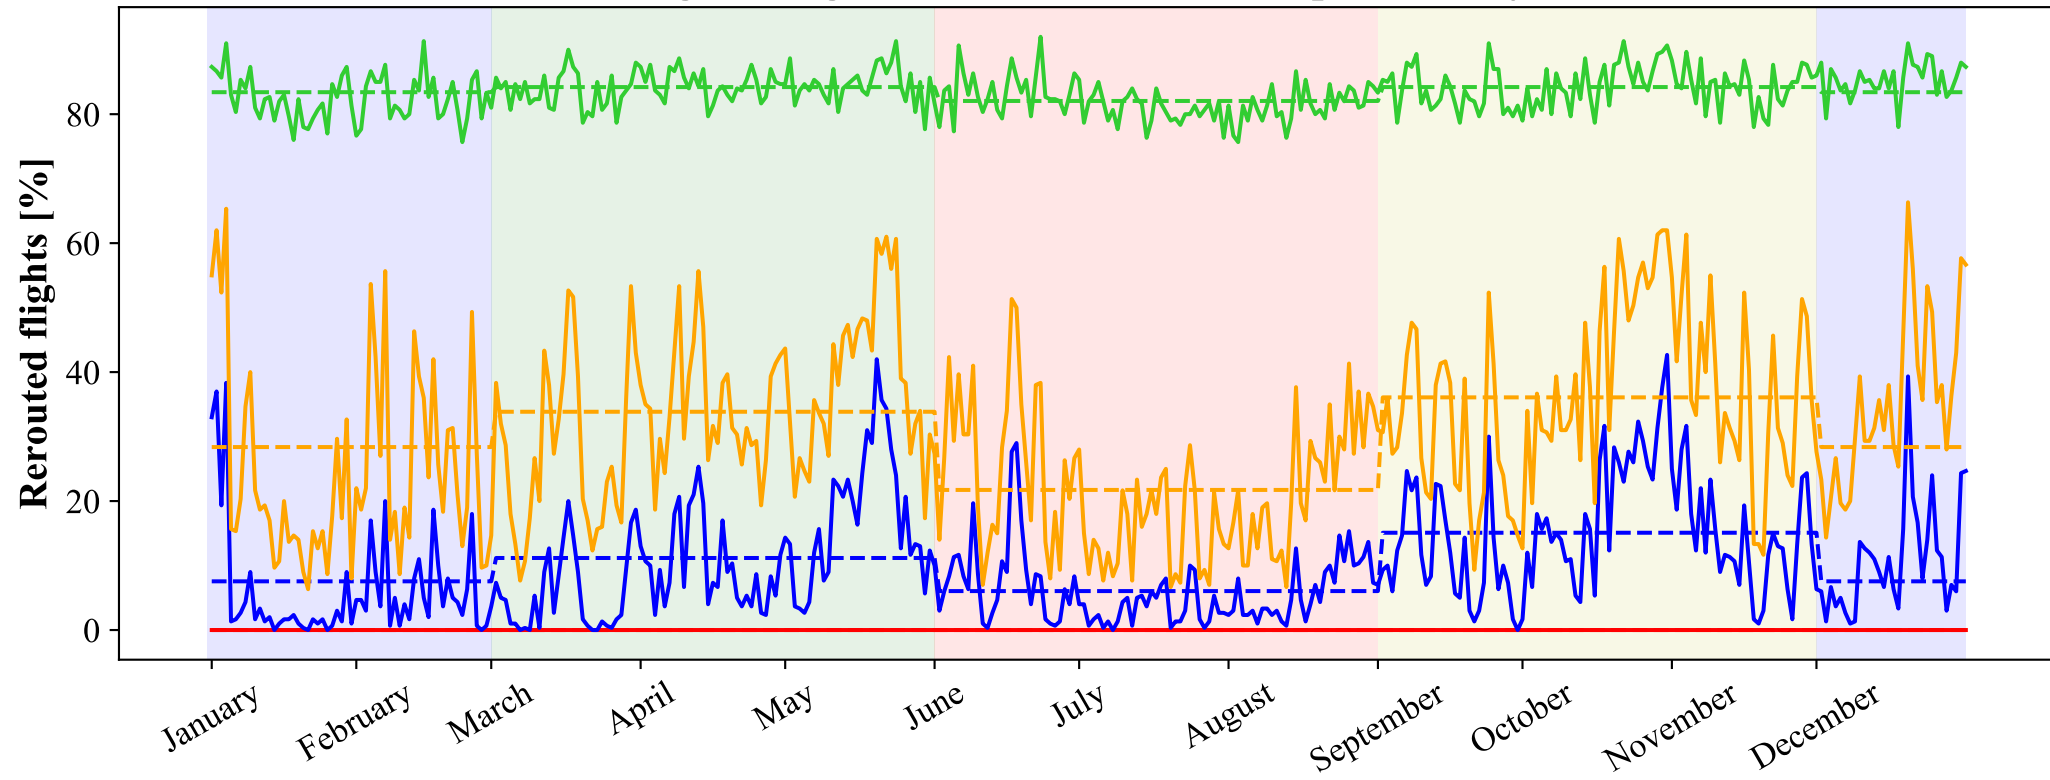

Supplement: Supplementary file 31 [file re-routed_flights.pdf › plots_main_paper/re-routed_flights.pdf]

# Climate Impact Mitigation Potential [%]

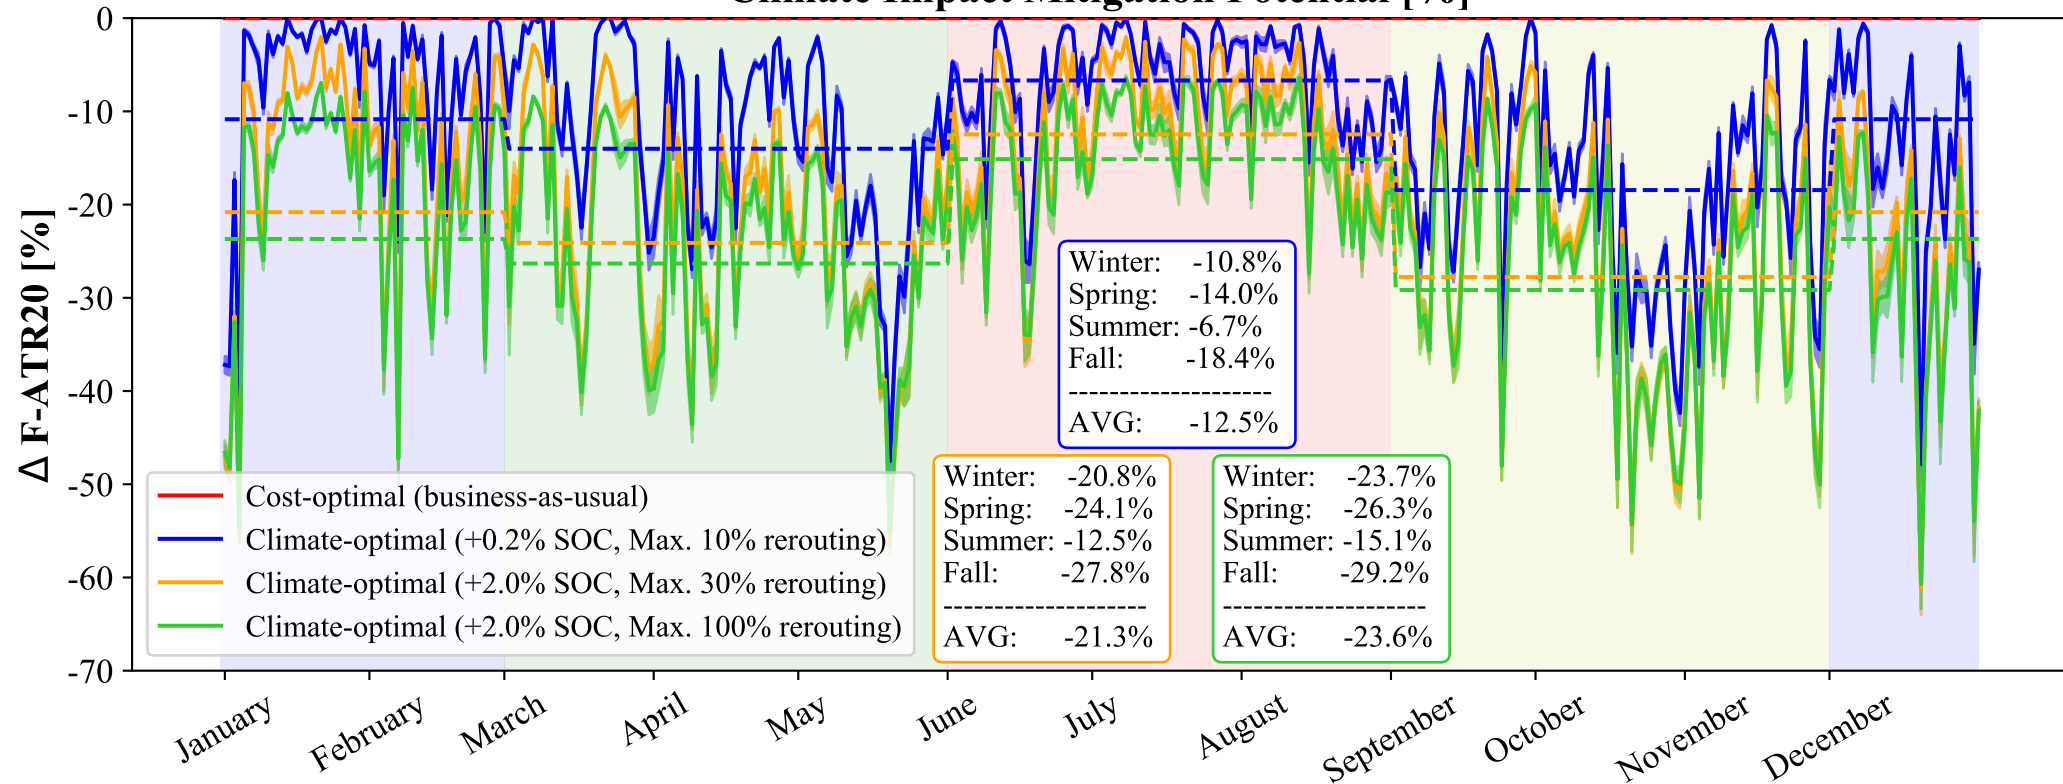

Supplement: Supplementary file 32 [file relative_mitigation_atr_20.pdf › plots_main_paper/relative_mitigation_atr_20.pdf]

Sensitivity Analysis: Relative Humidity Correction (Climate-optimal w.r.t. +2.0 SOC & Max. 30% rerouting)

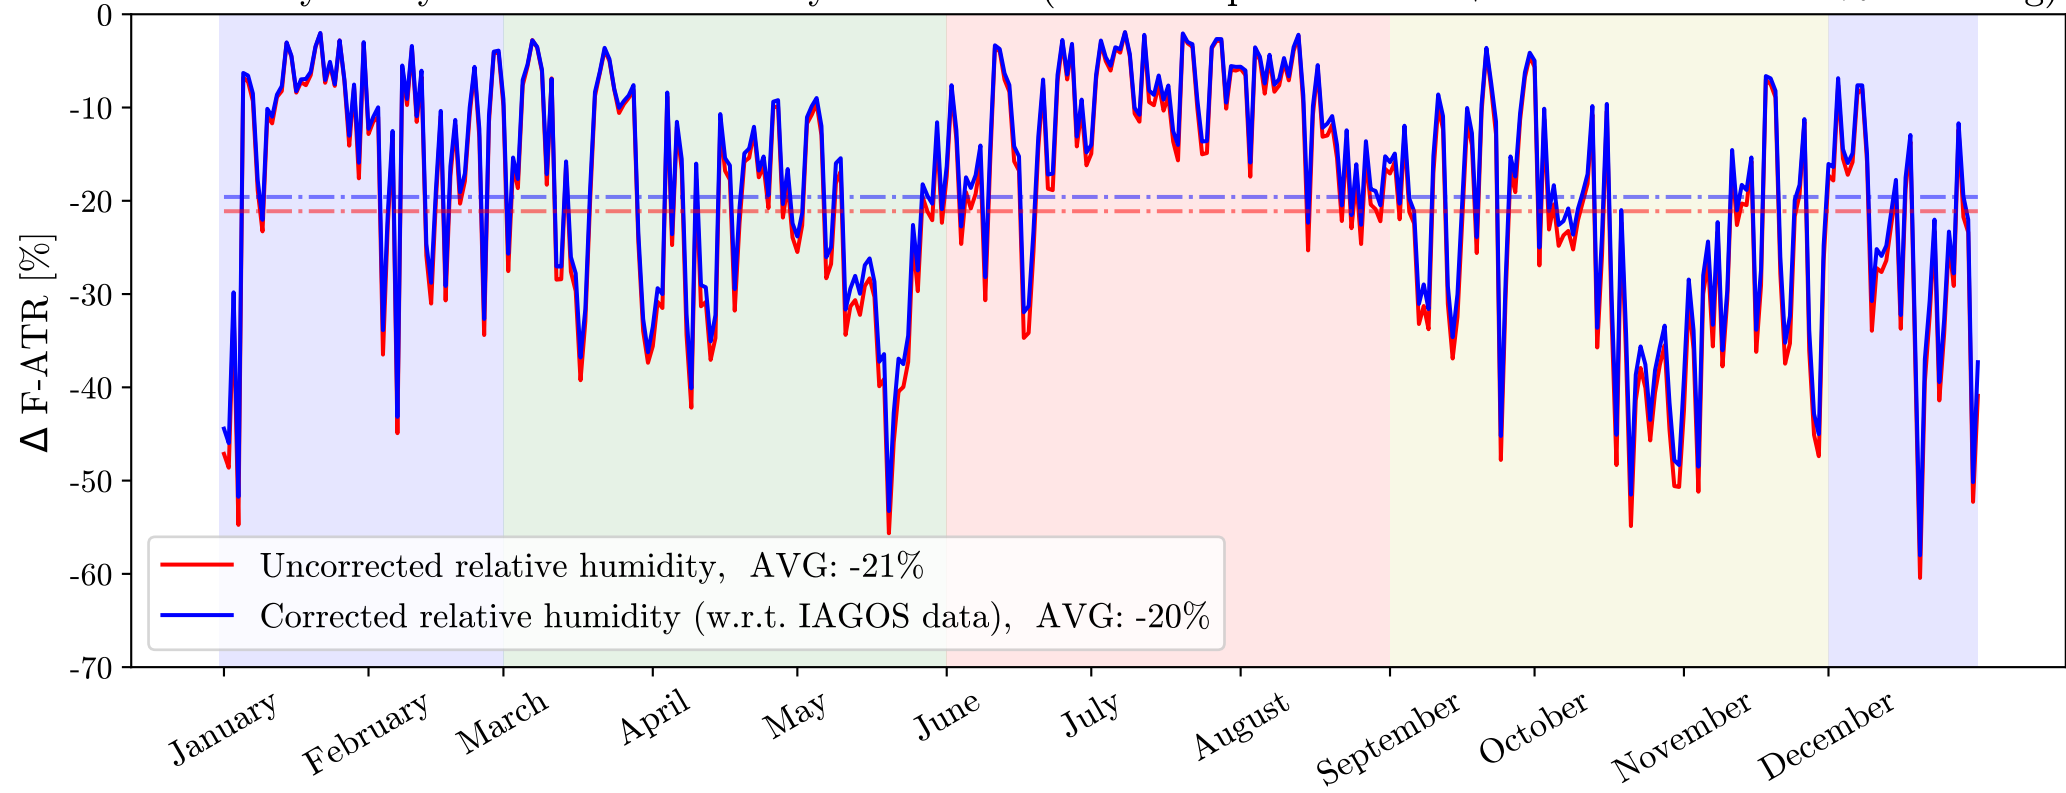

Supplement: Supplementary file 33 [file rl_correction.pdf › plots_main_paper/rl_correction.pdf]

Sensitivity Analysis: Climate Metric (Time Horizon)

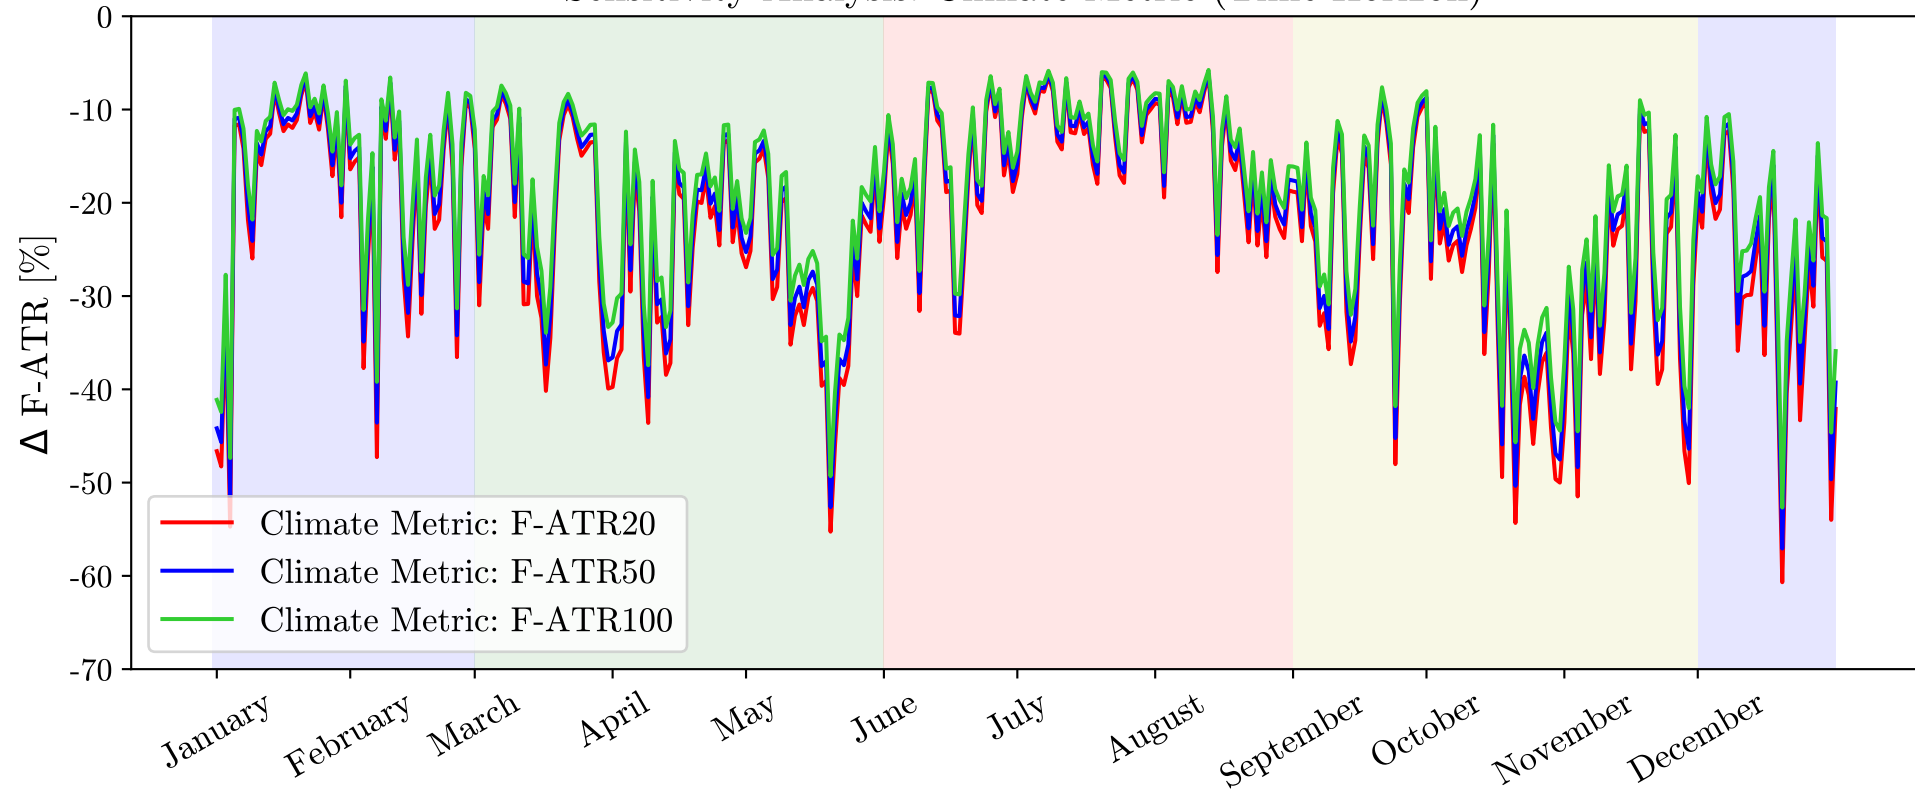

Supplement: Supplementary file 36 [file climate metric_2.pdf › plots_up_to_3.0%_SOC_unrestricted_rerouting/climate metric_2.pdf]

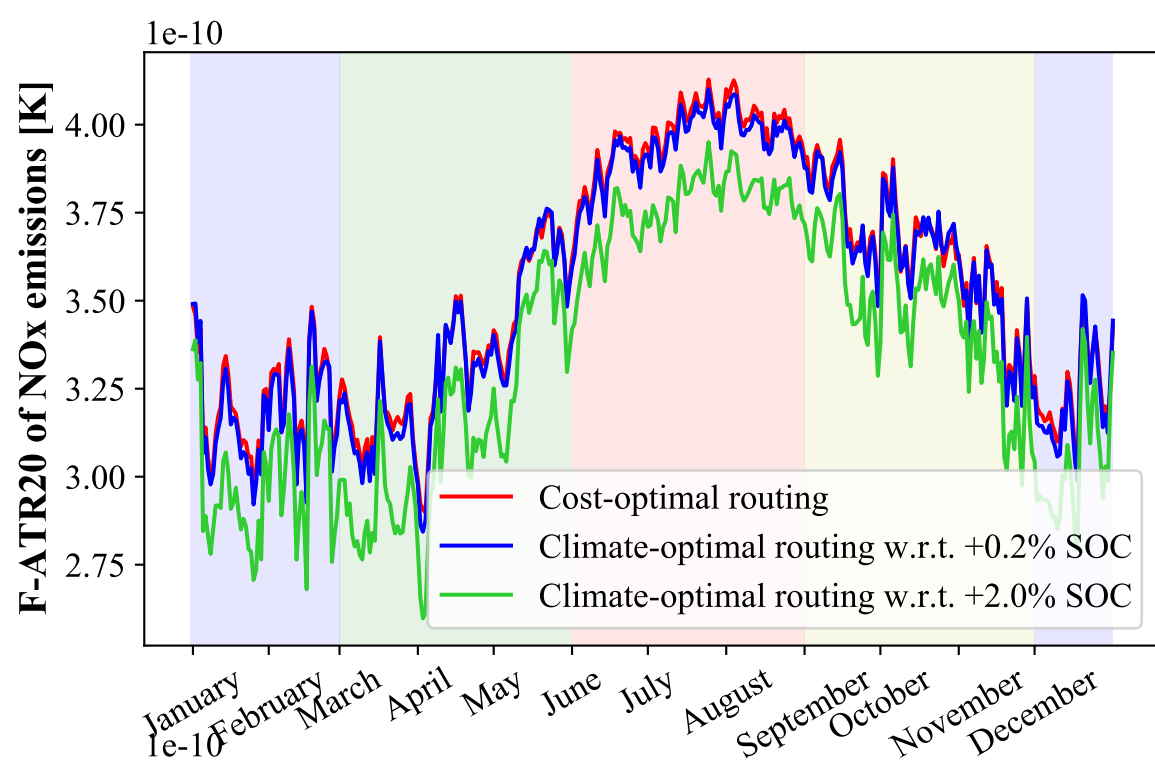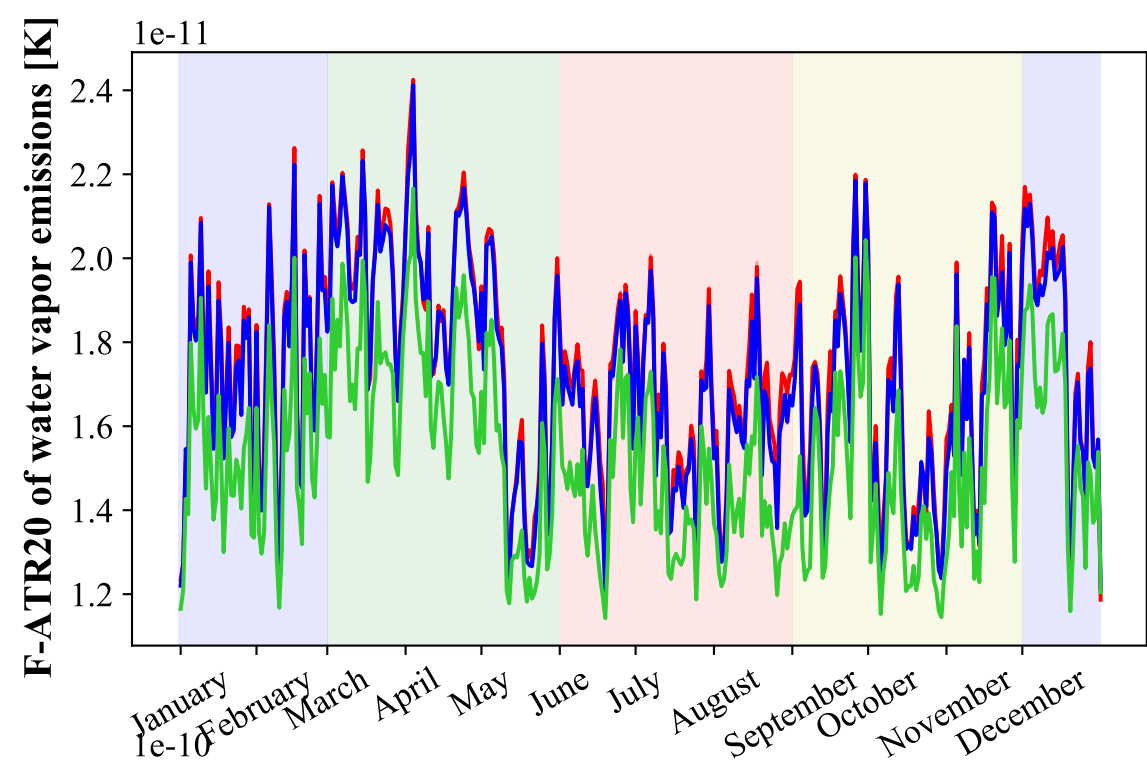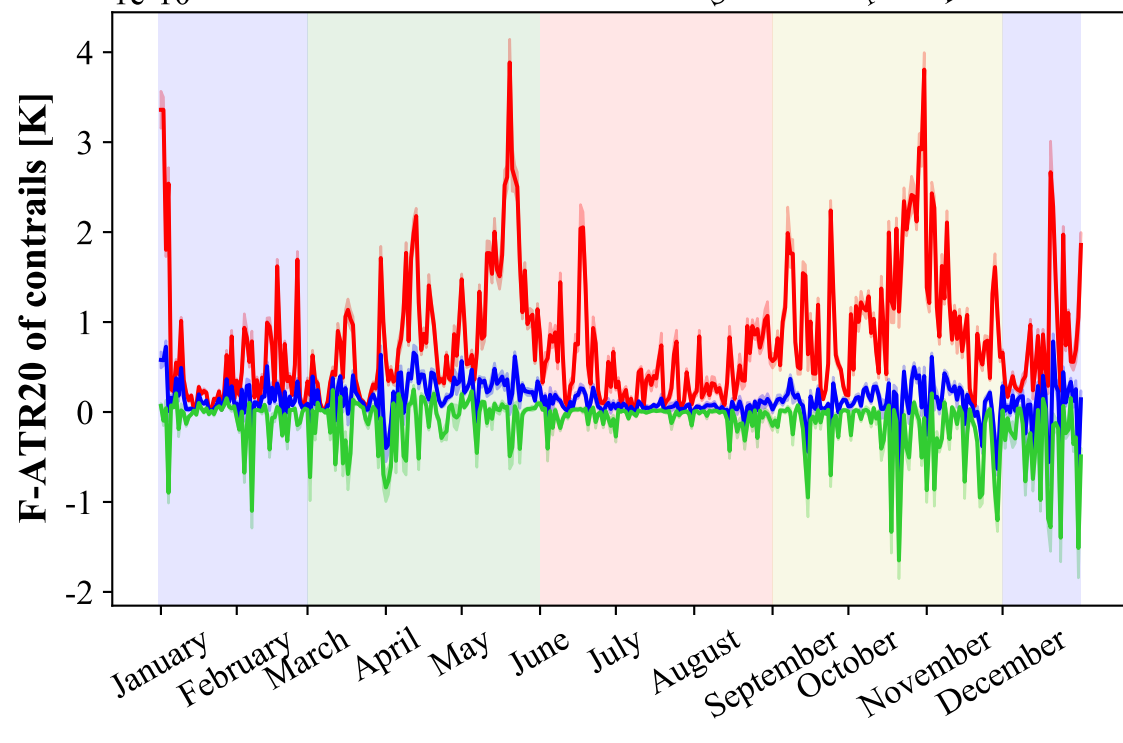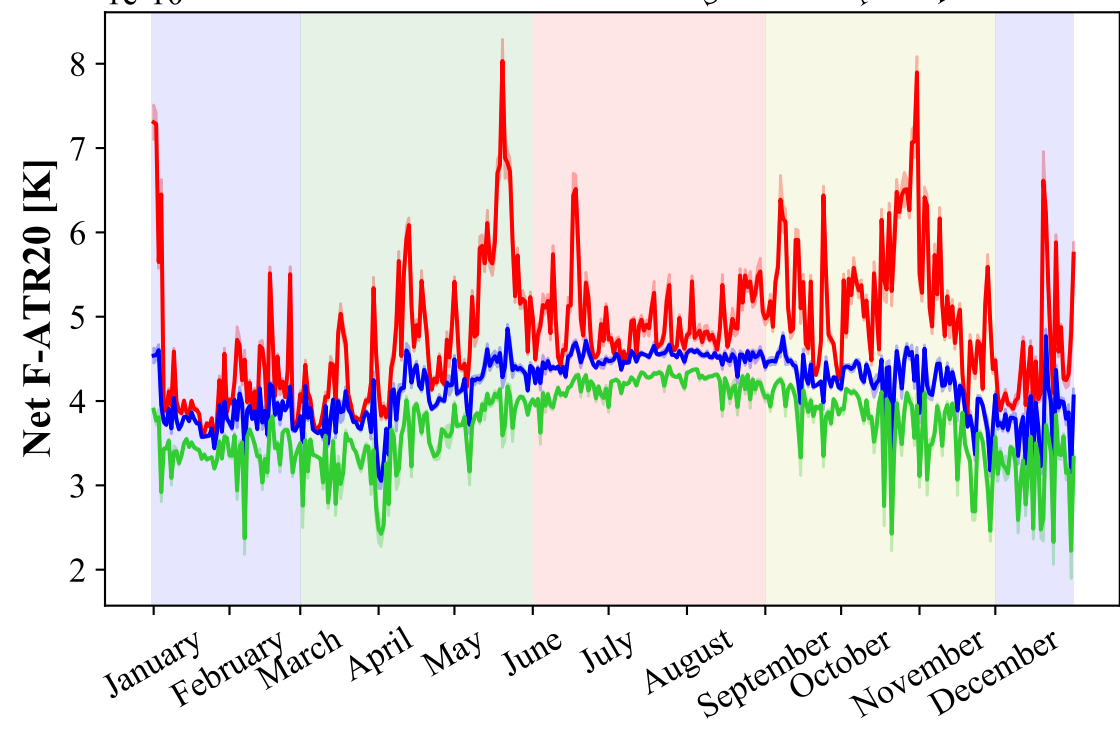

Supplement: Supplementary file 37 [file climate_new.pdf › plots_up_to_3.0%_SOC_unrestricted_rerouting/climate_new.pdf]

Coverage of cooling contrails & climate impact mitigation potential

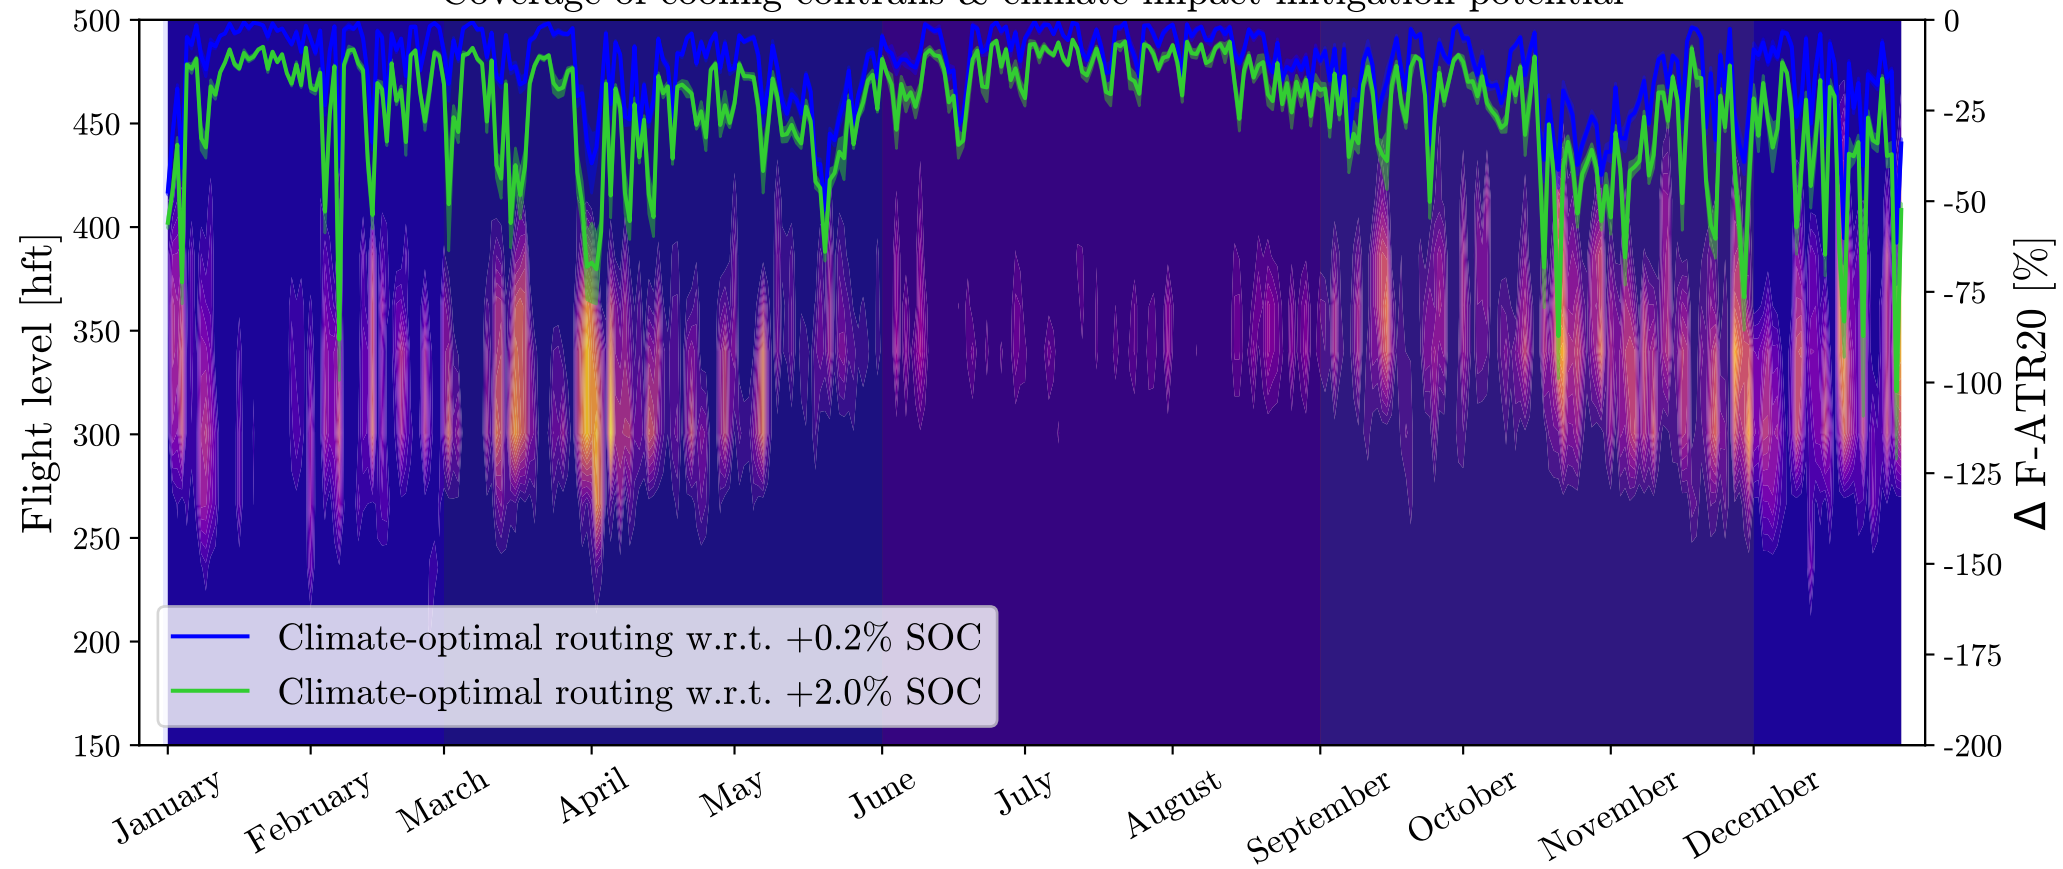

Supplement: Supplementary file 38 [file colling_contrails_mitigation_potential.pdf › plots_up_to_3.0%_SOC_unrestricted_rerouting/colling_contrails_mitigation_potential.pdf]

### Departure at 0000 UTC

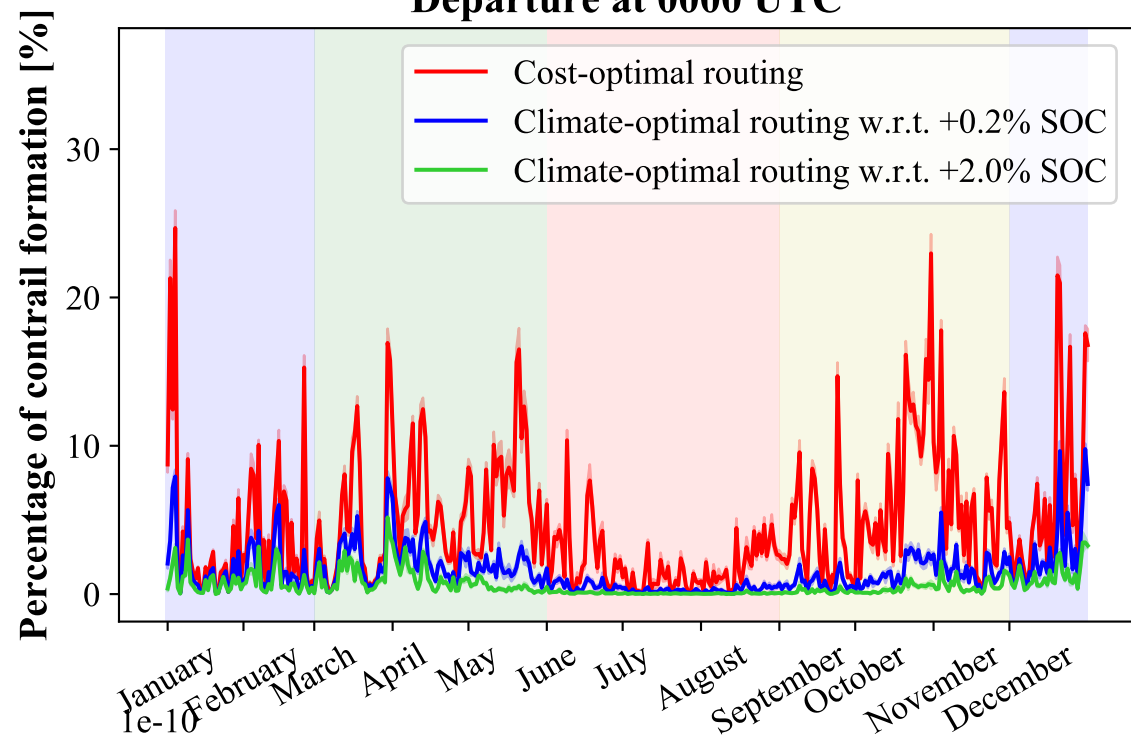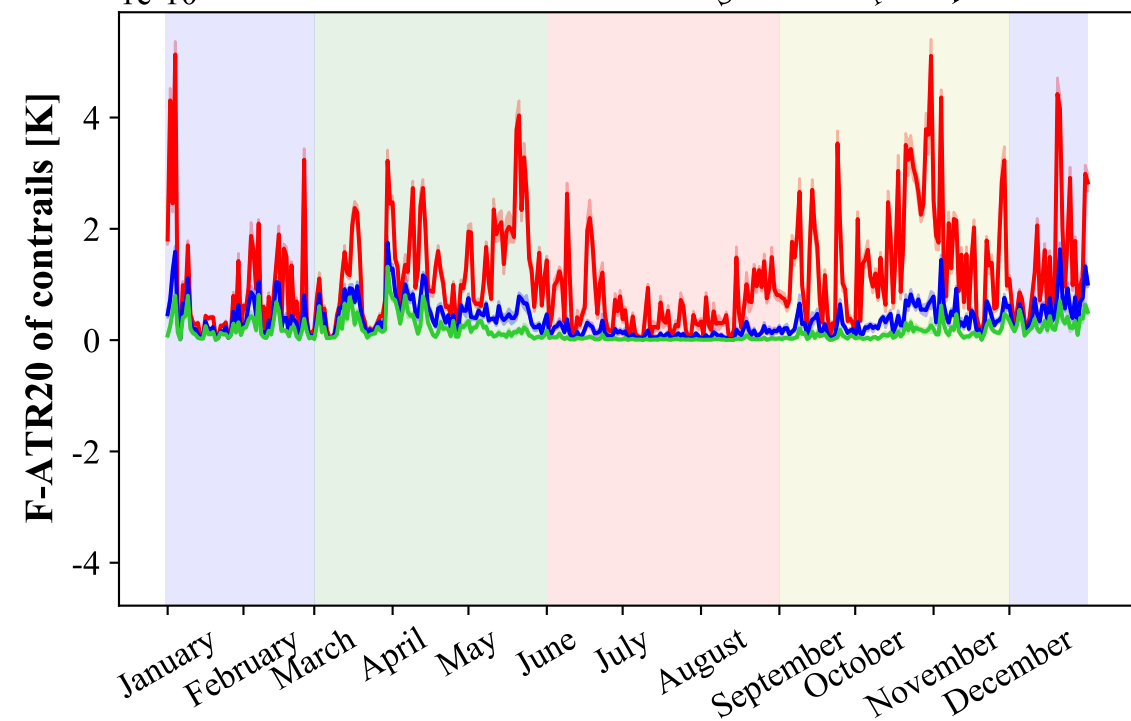

### Departure at 1200 UTC

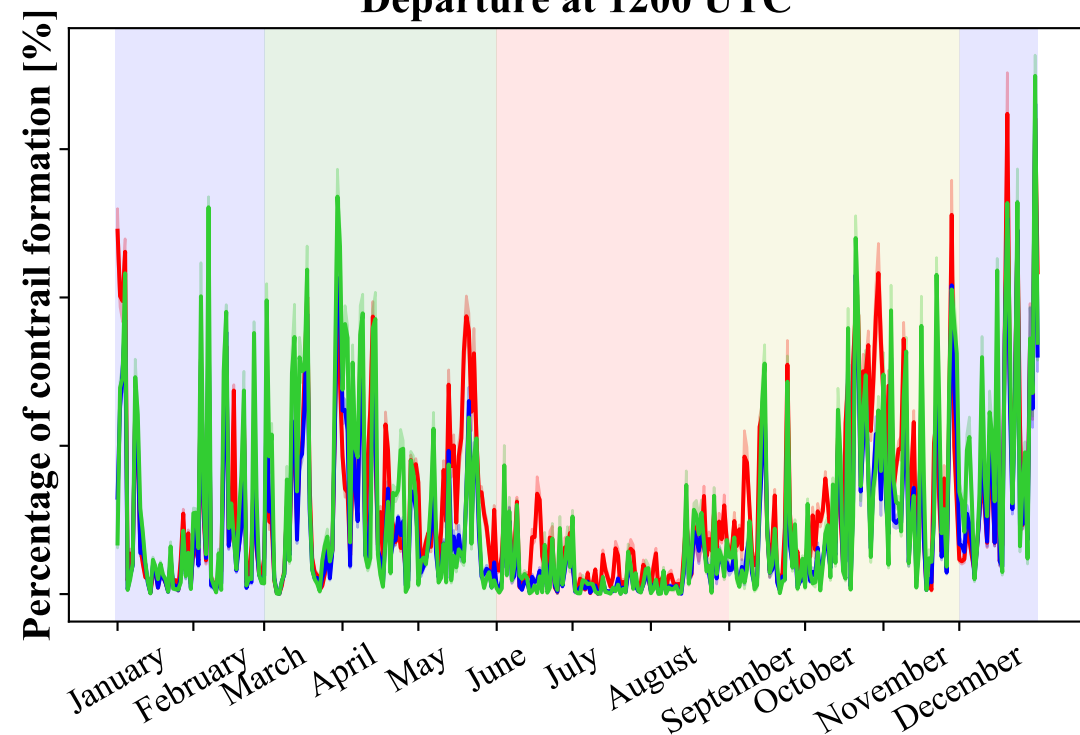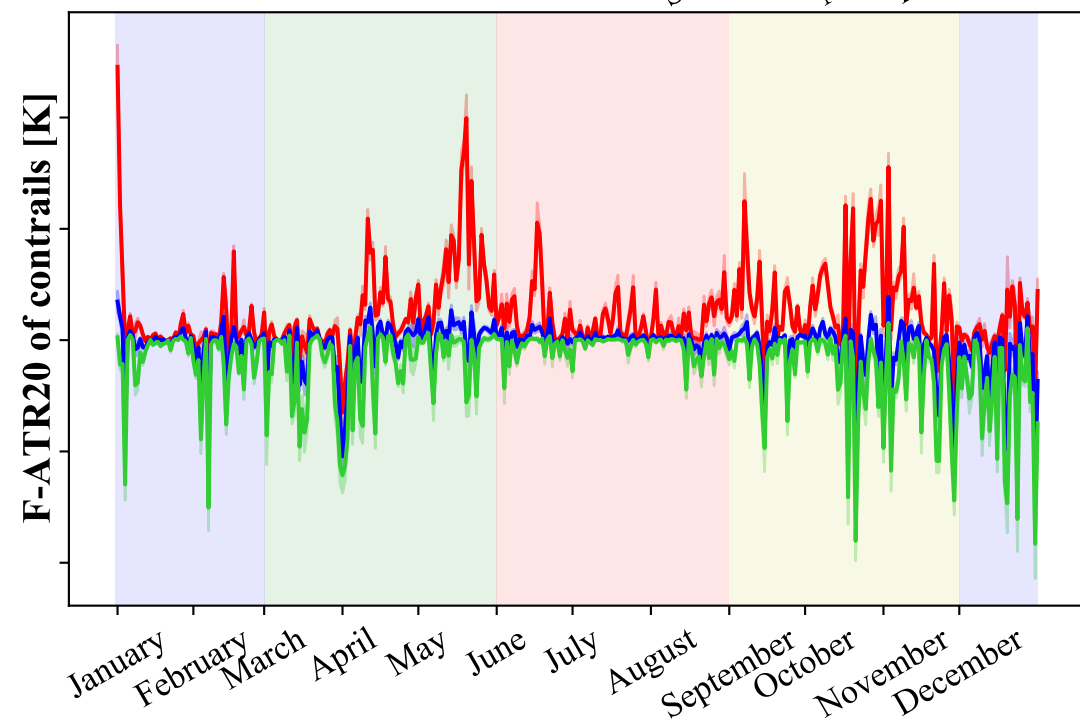

Supplement: Supplementary file 39 [file contrail_2.pdf › plots_up_to_3.0%_SOC_unrestricted_rerouting/contrail_2.pdf]

# Formation of persistent contrails & climate impact mitigation potential

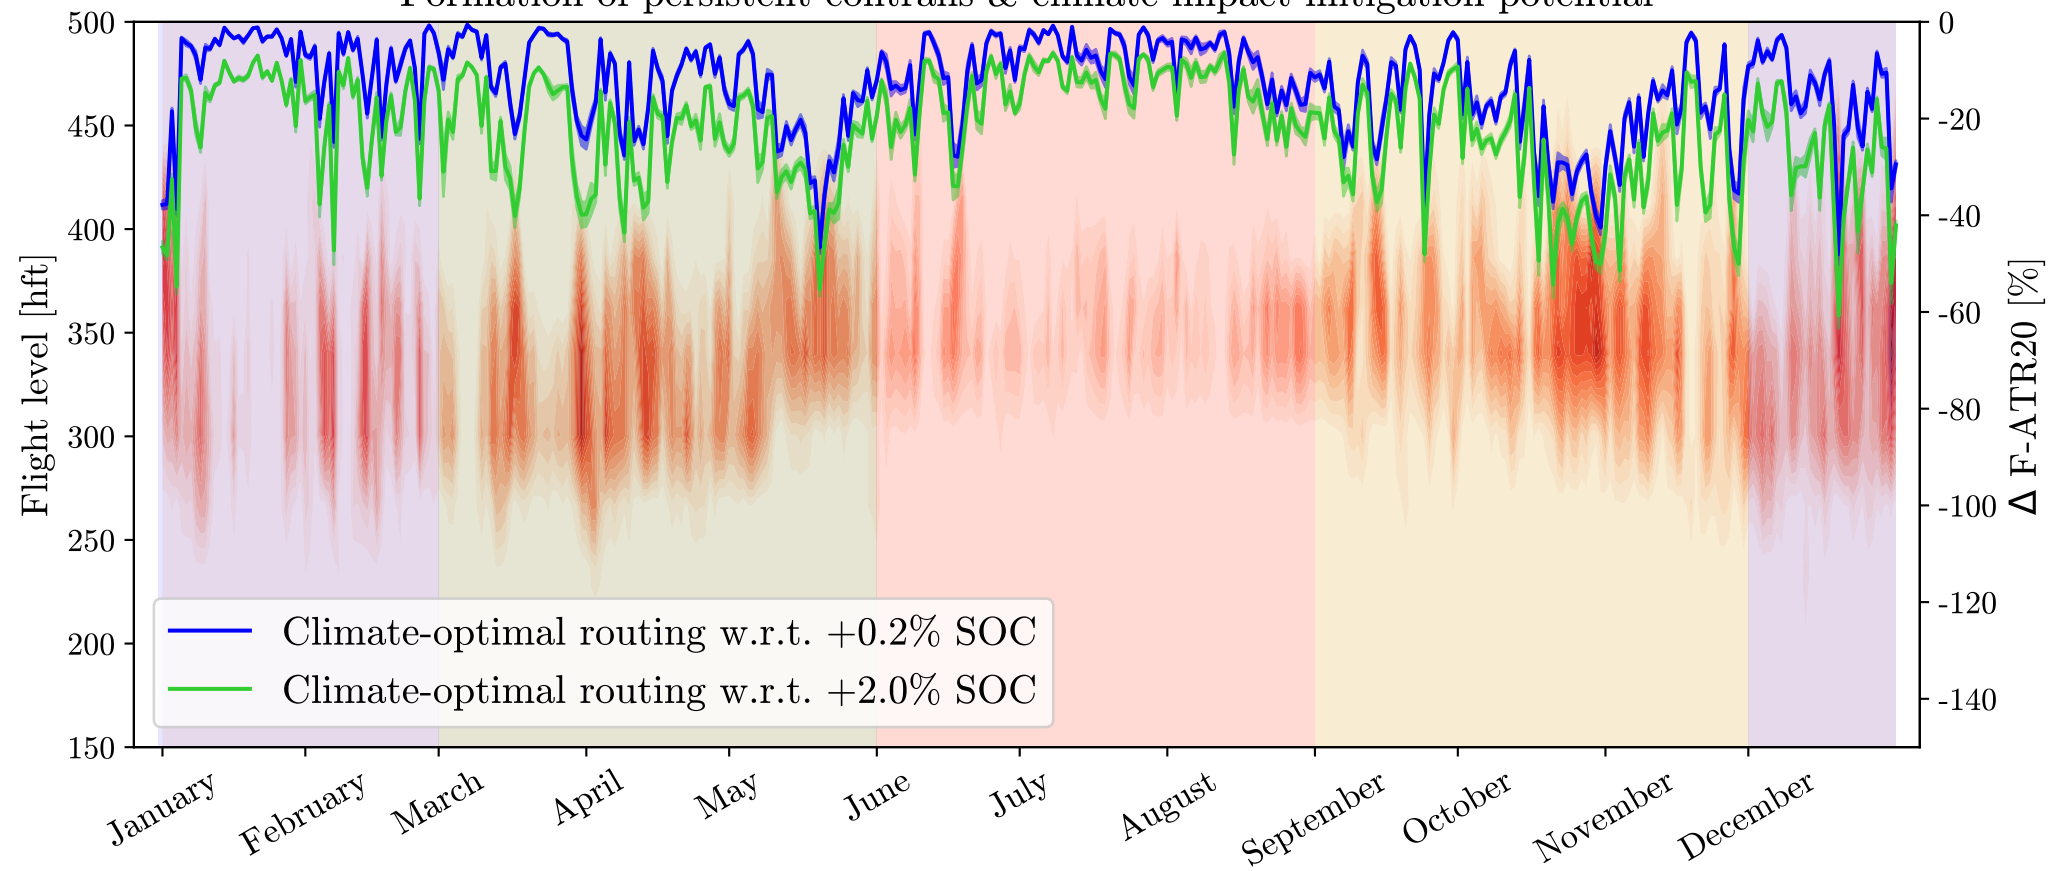

Supplement: Supplementary file 40 [file contrail_mitigation.pdf › plots_up_to_3.0%_SOC_unrestricted_rerouting/contrail_mitigation.pdf]

Coverage of cooling contrails & F-ATR20 of contrails

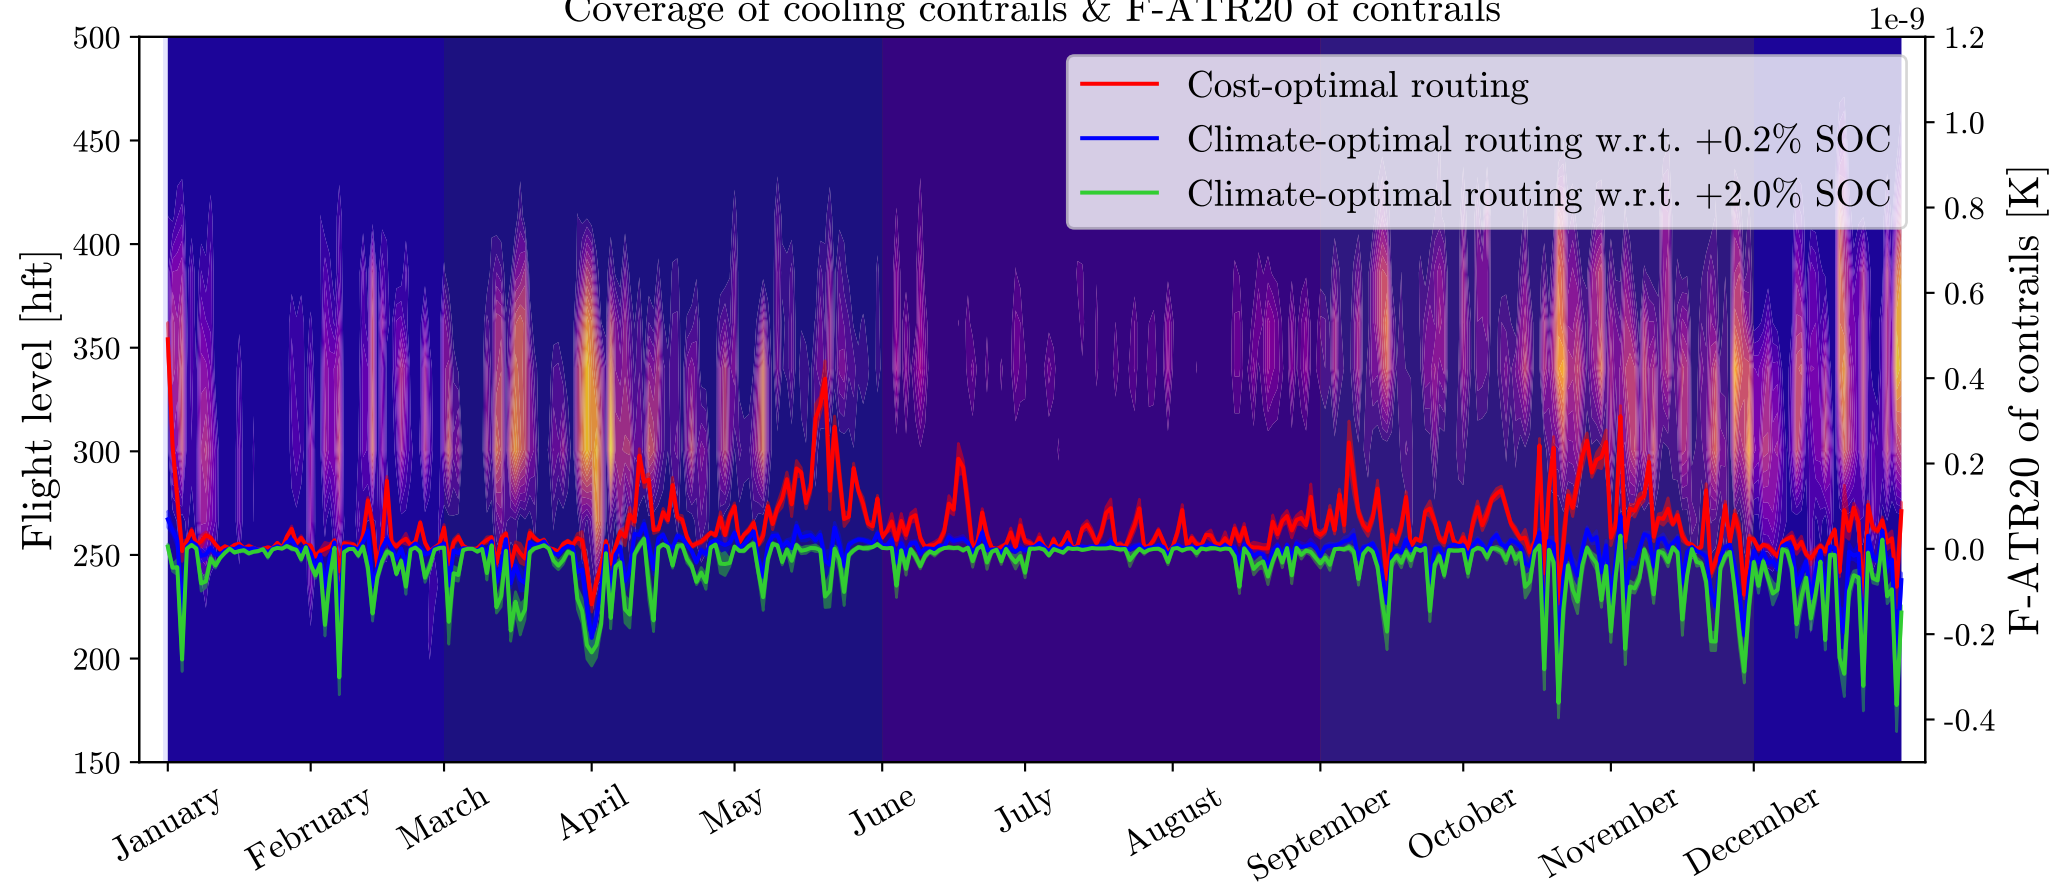

Supplement: Supplementary file 41 [file cooling_contrails_contrail_2.pdf › plots_up_to_3.0%_SOC_unrestricted_rerouting/cooling_contrails_contrail_2.pdf]

Coverage of cooling contrails & Distances forming persistent contrails

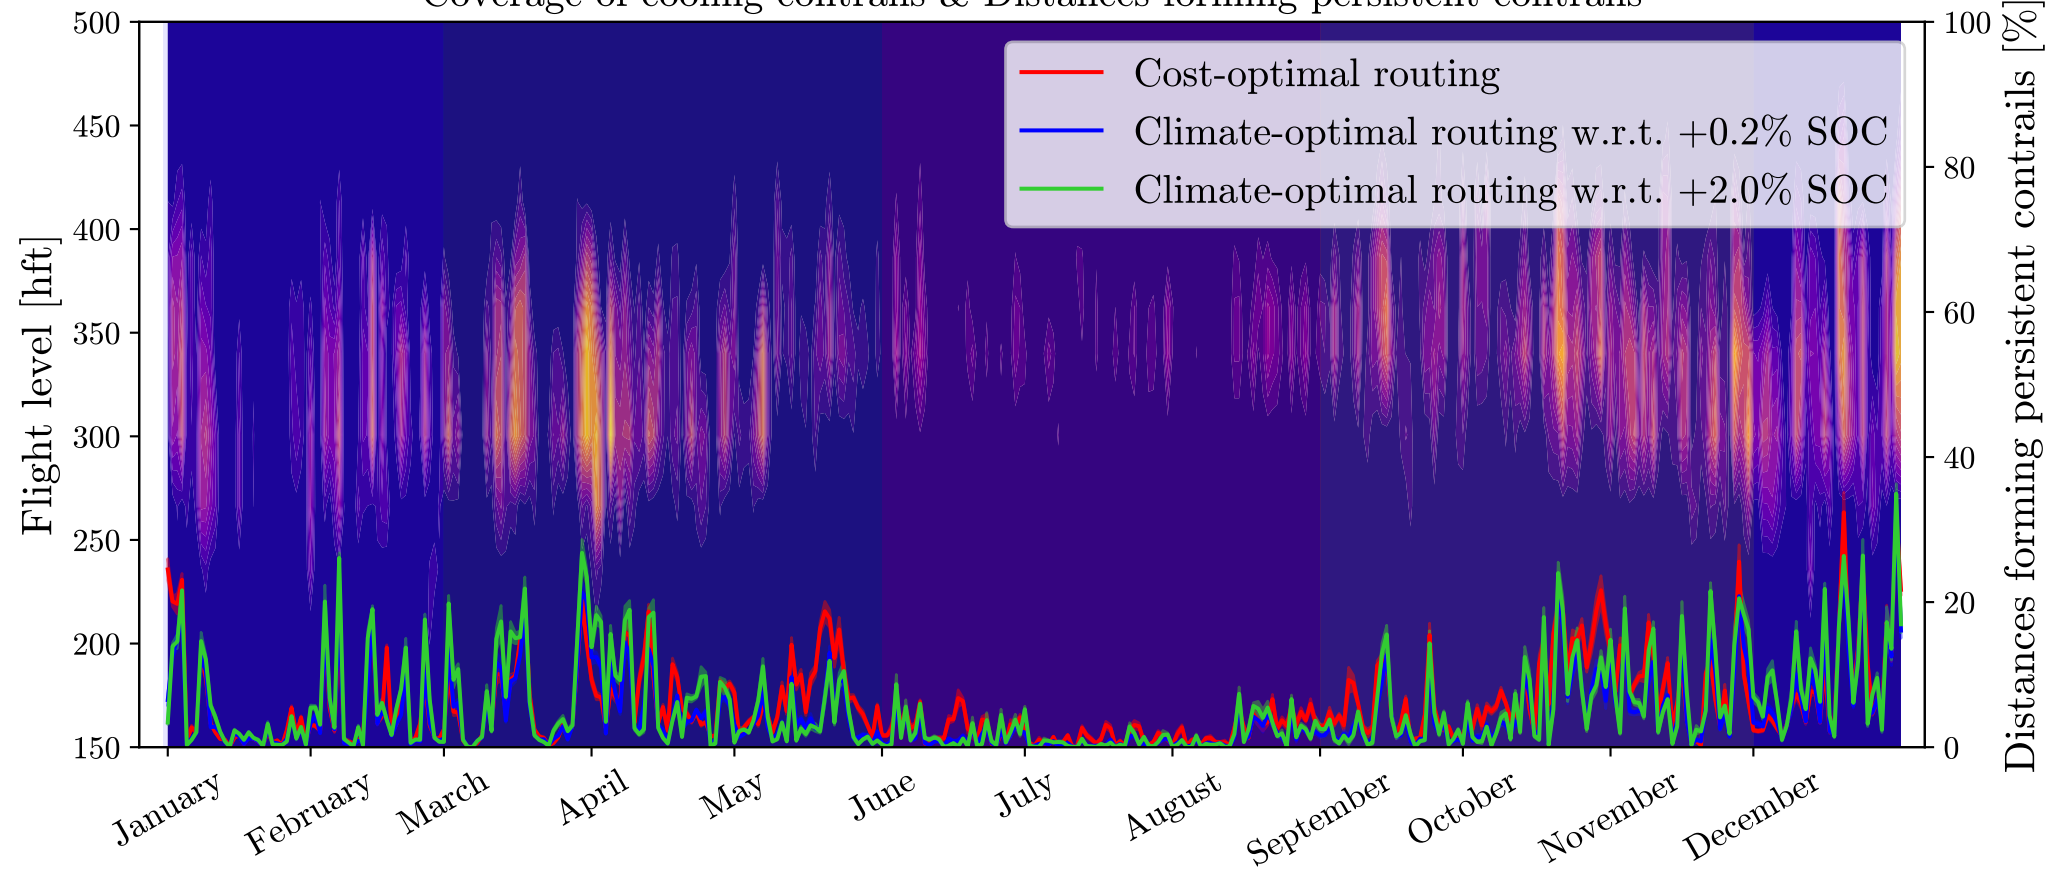

Supplement: Supplementary file 42 [file cooling_contrails_mitigation_potential_contrail_dis_2.pdf › plots_up_to_3.0%_SOC_unrestricted_rerouting/cooling_contrails_mitigation_potential_contrail_dis_2.pdf]

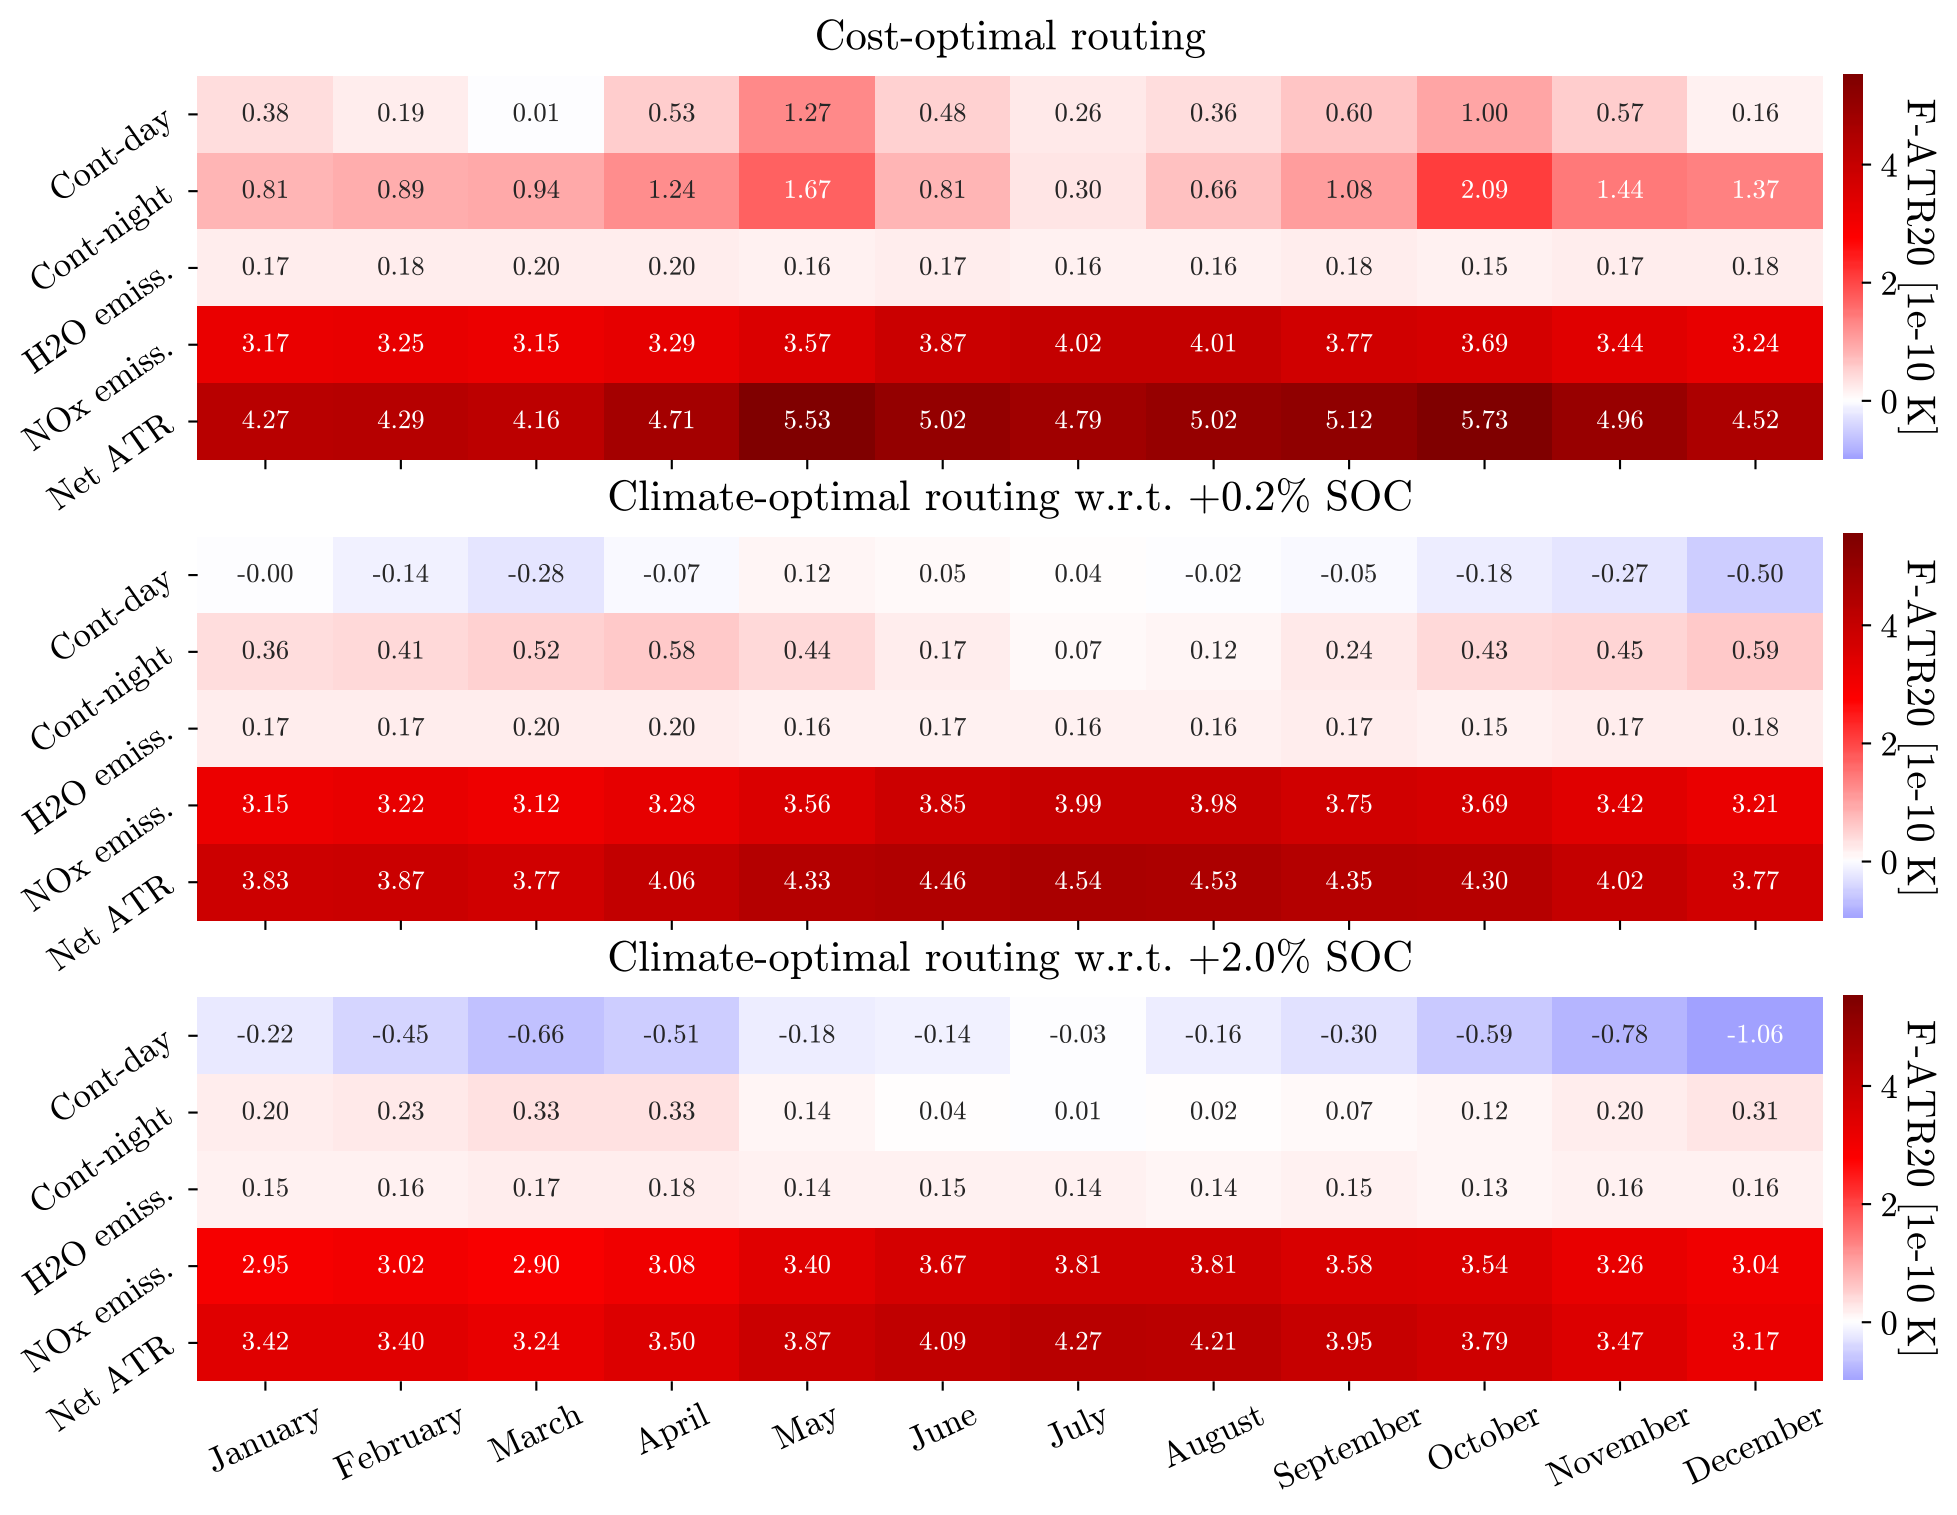

Supplement: Supplementary file 43 [file cost_opt.pdf › plots_up_to_3.0%_SOC_unrestricted_rerouting/cost_opt.pdf]

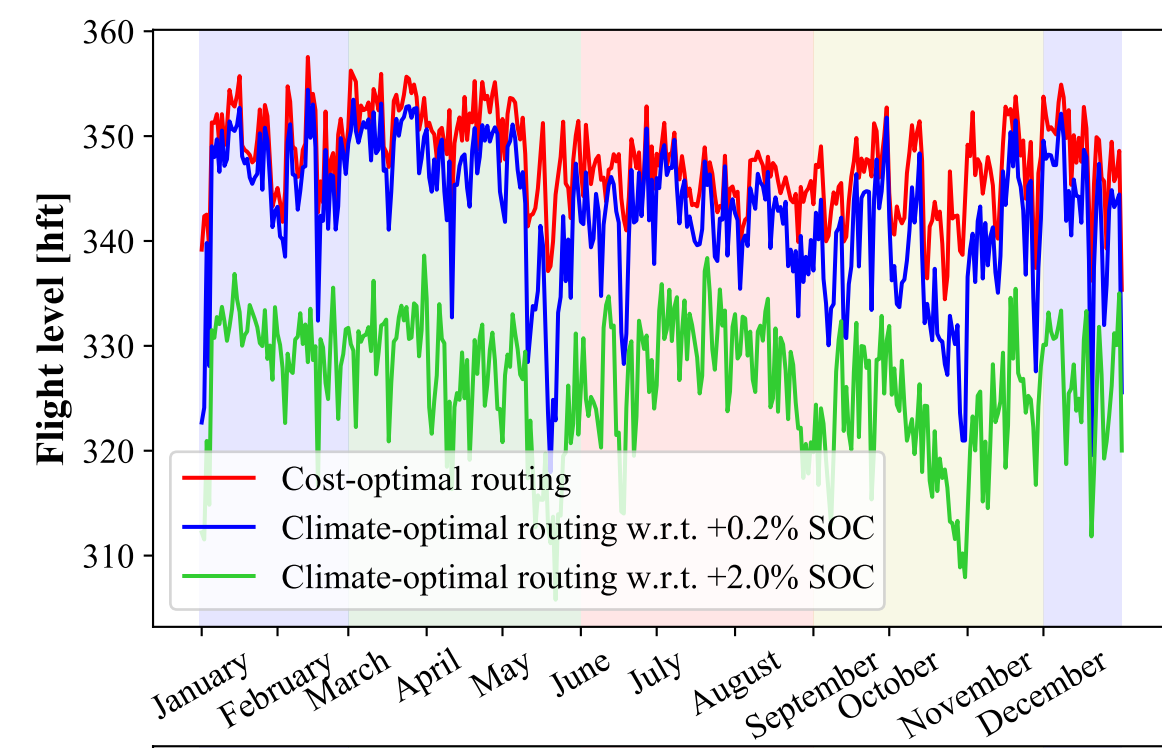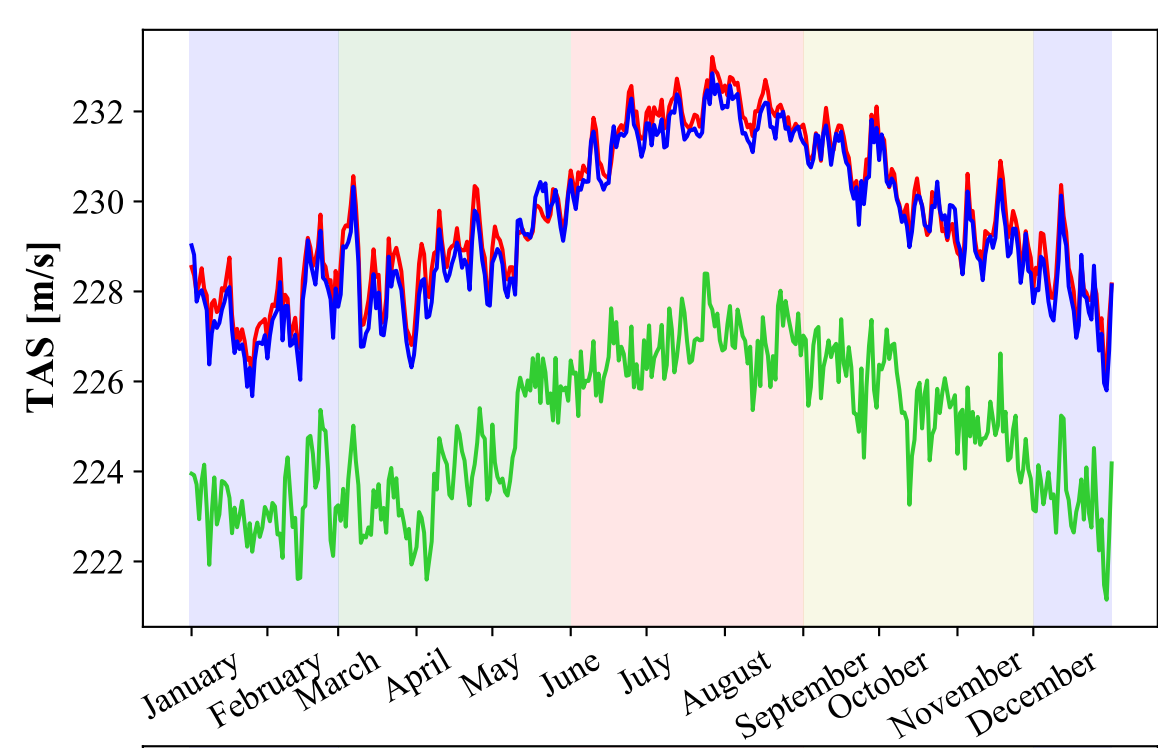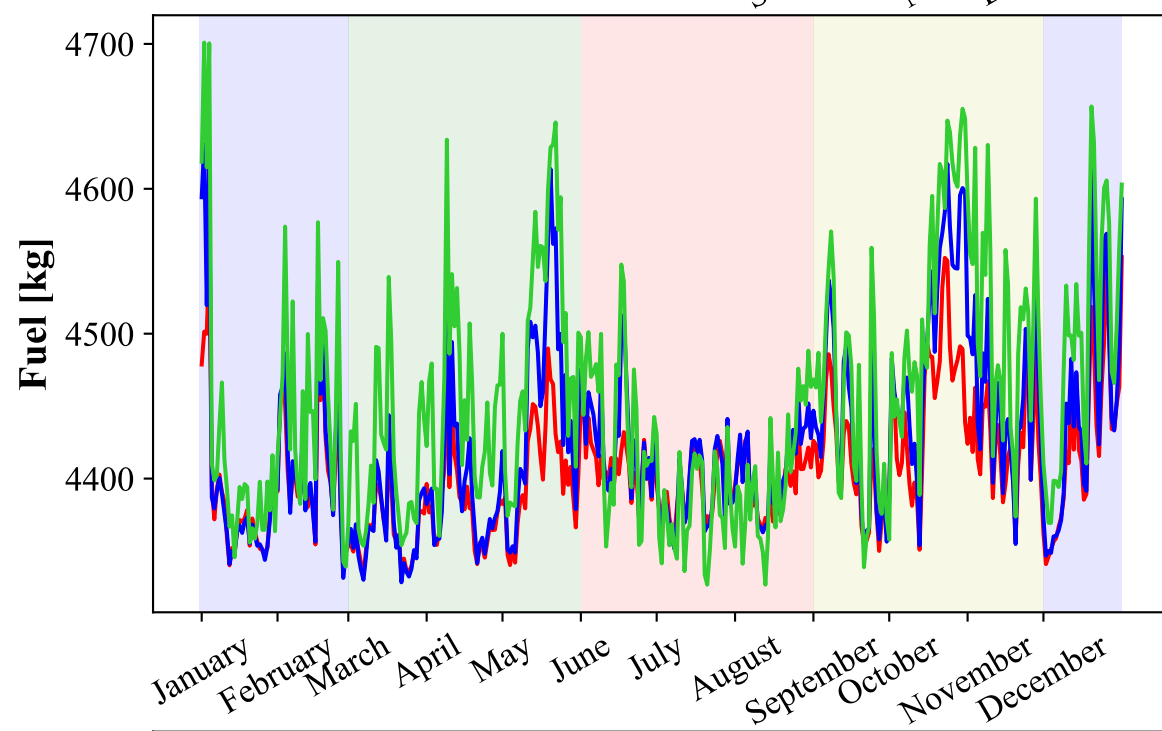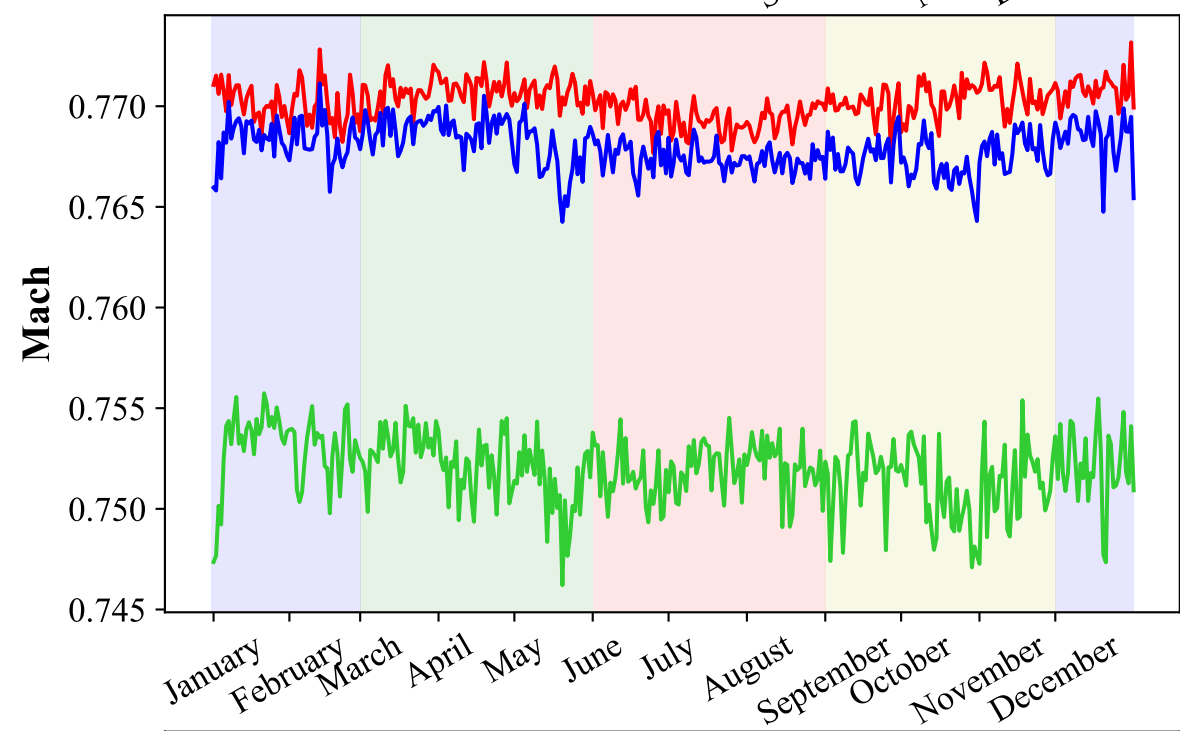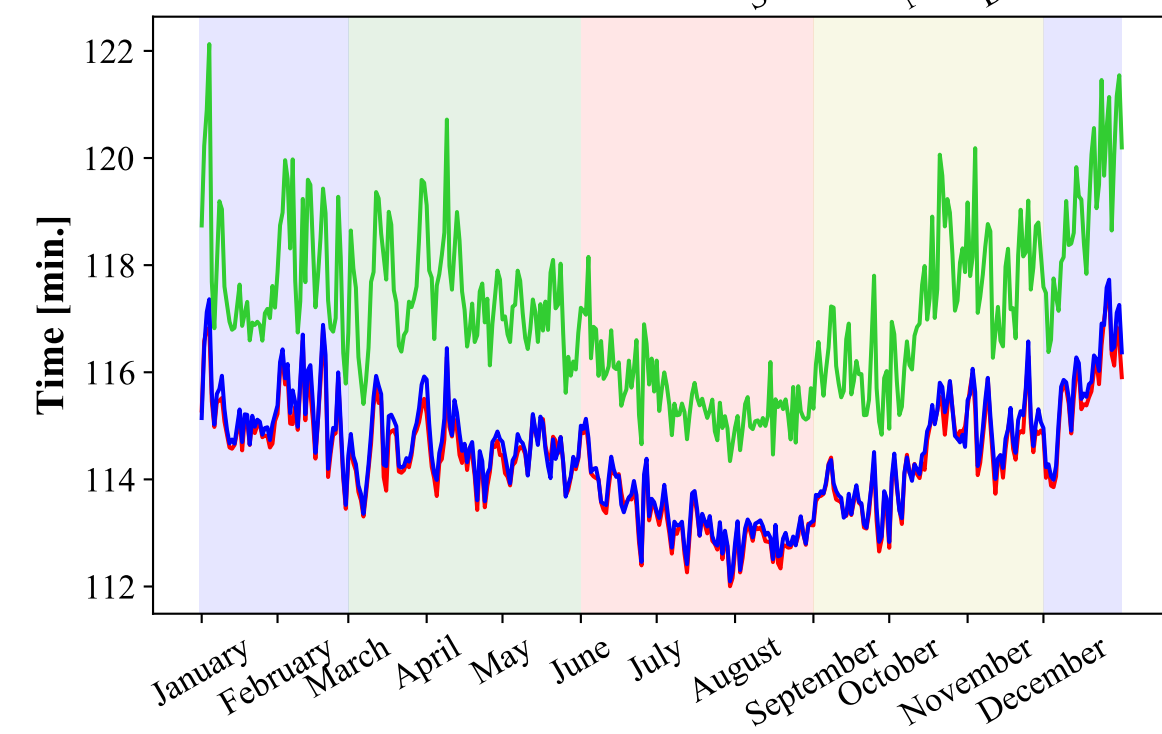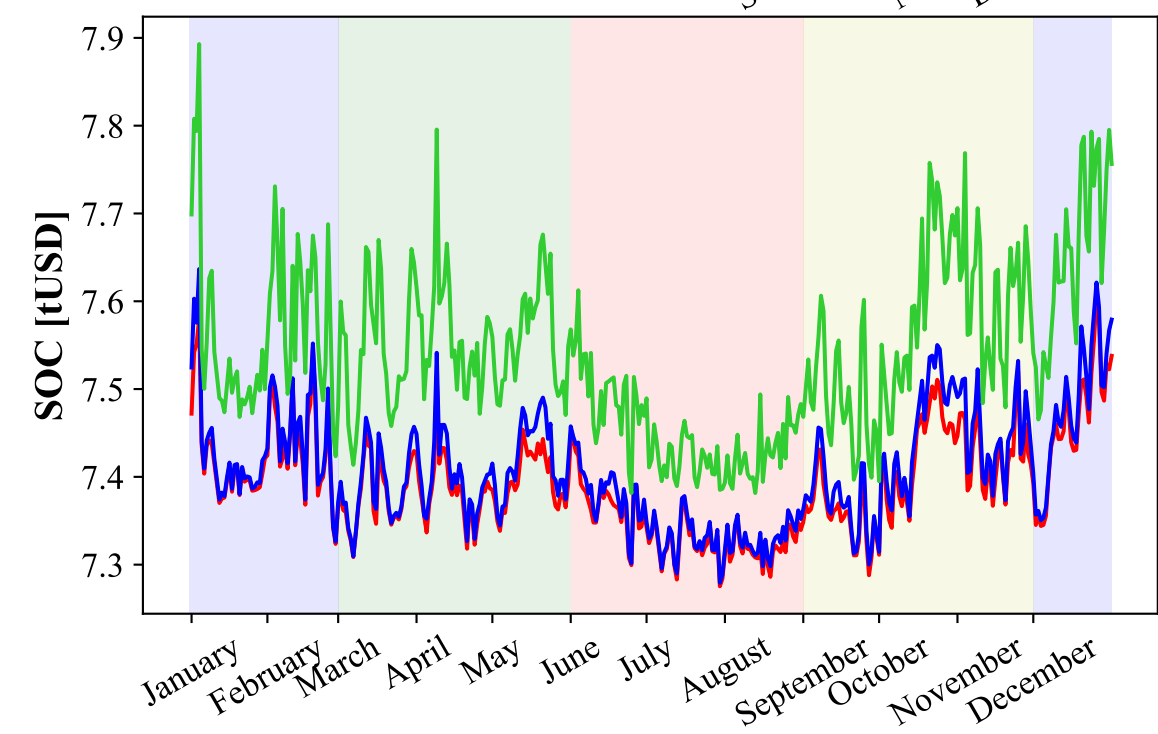

Supplement: Supplementary file 44 [file cost_related_2.pdf › plots_up_to_3.0%_SOC_unrestricted_rerouting/cost_related_2.pdf]

# Sensitivity Analysis: Contrails Climate Impact Forcing Efficacies

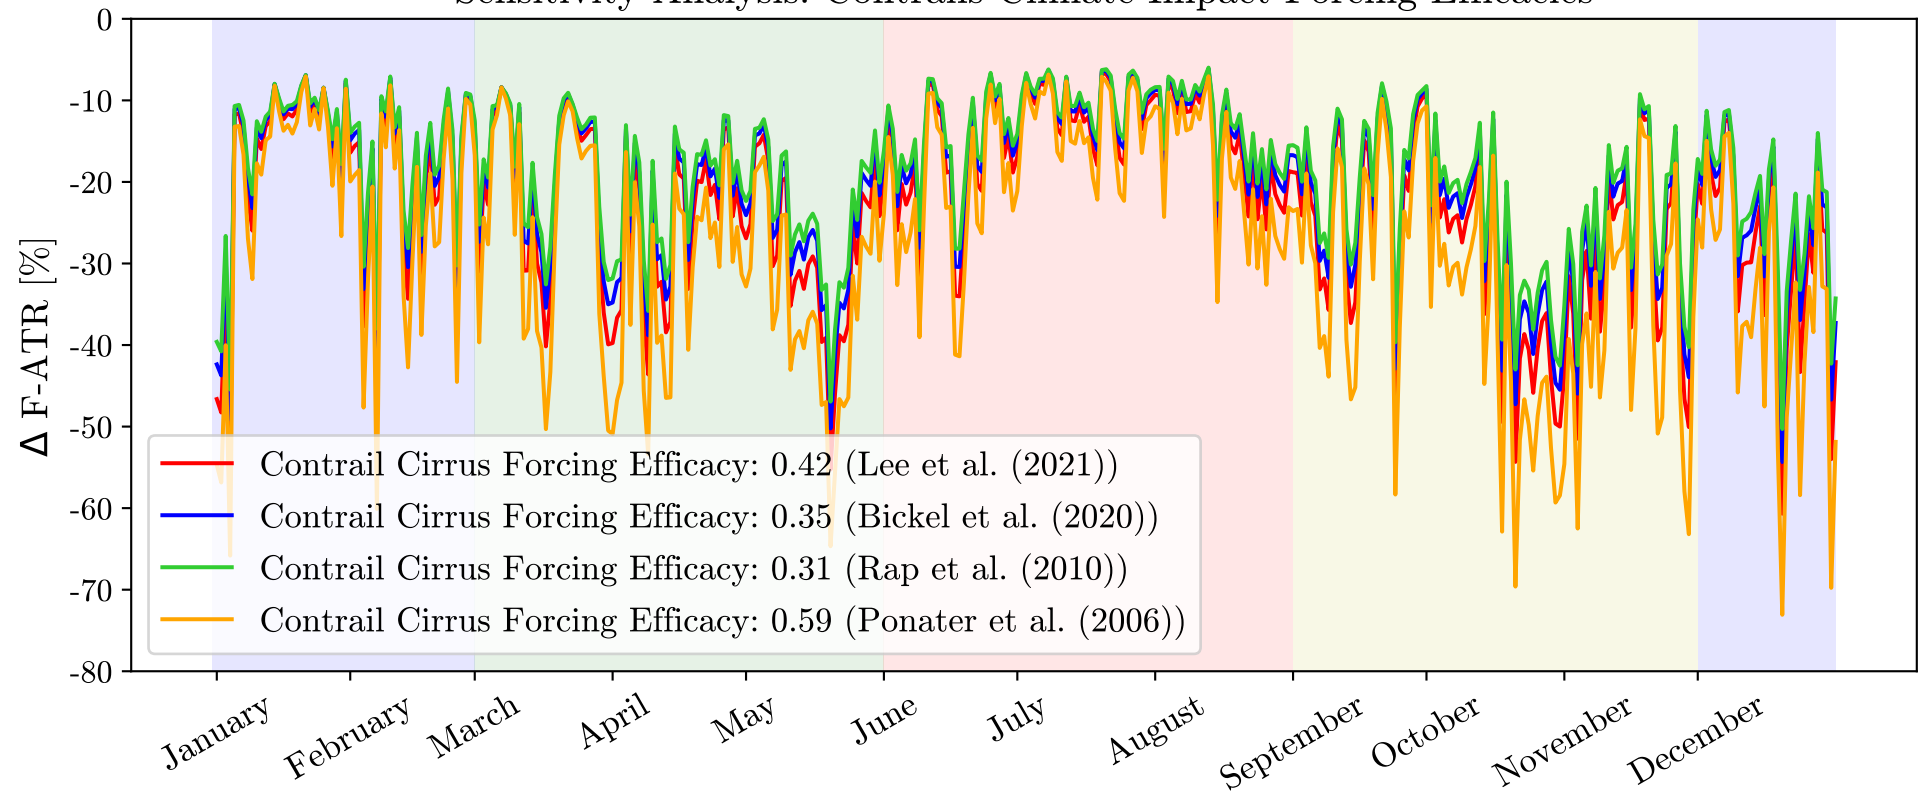

Supplement: Supplementary file 45 [file efficacy_2.pdf › plots_up_to_3.0%_SOC_unrestricted_rerouting/efficacy_2.pdf]

Climate Impact over the next 100 years

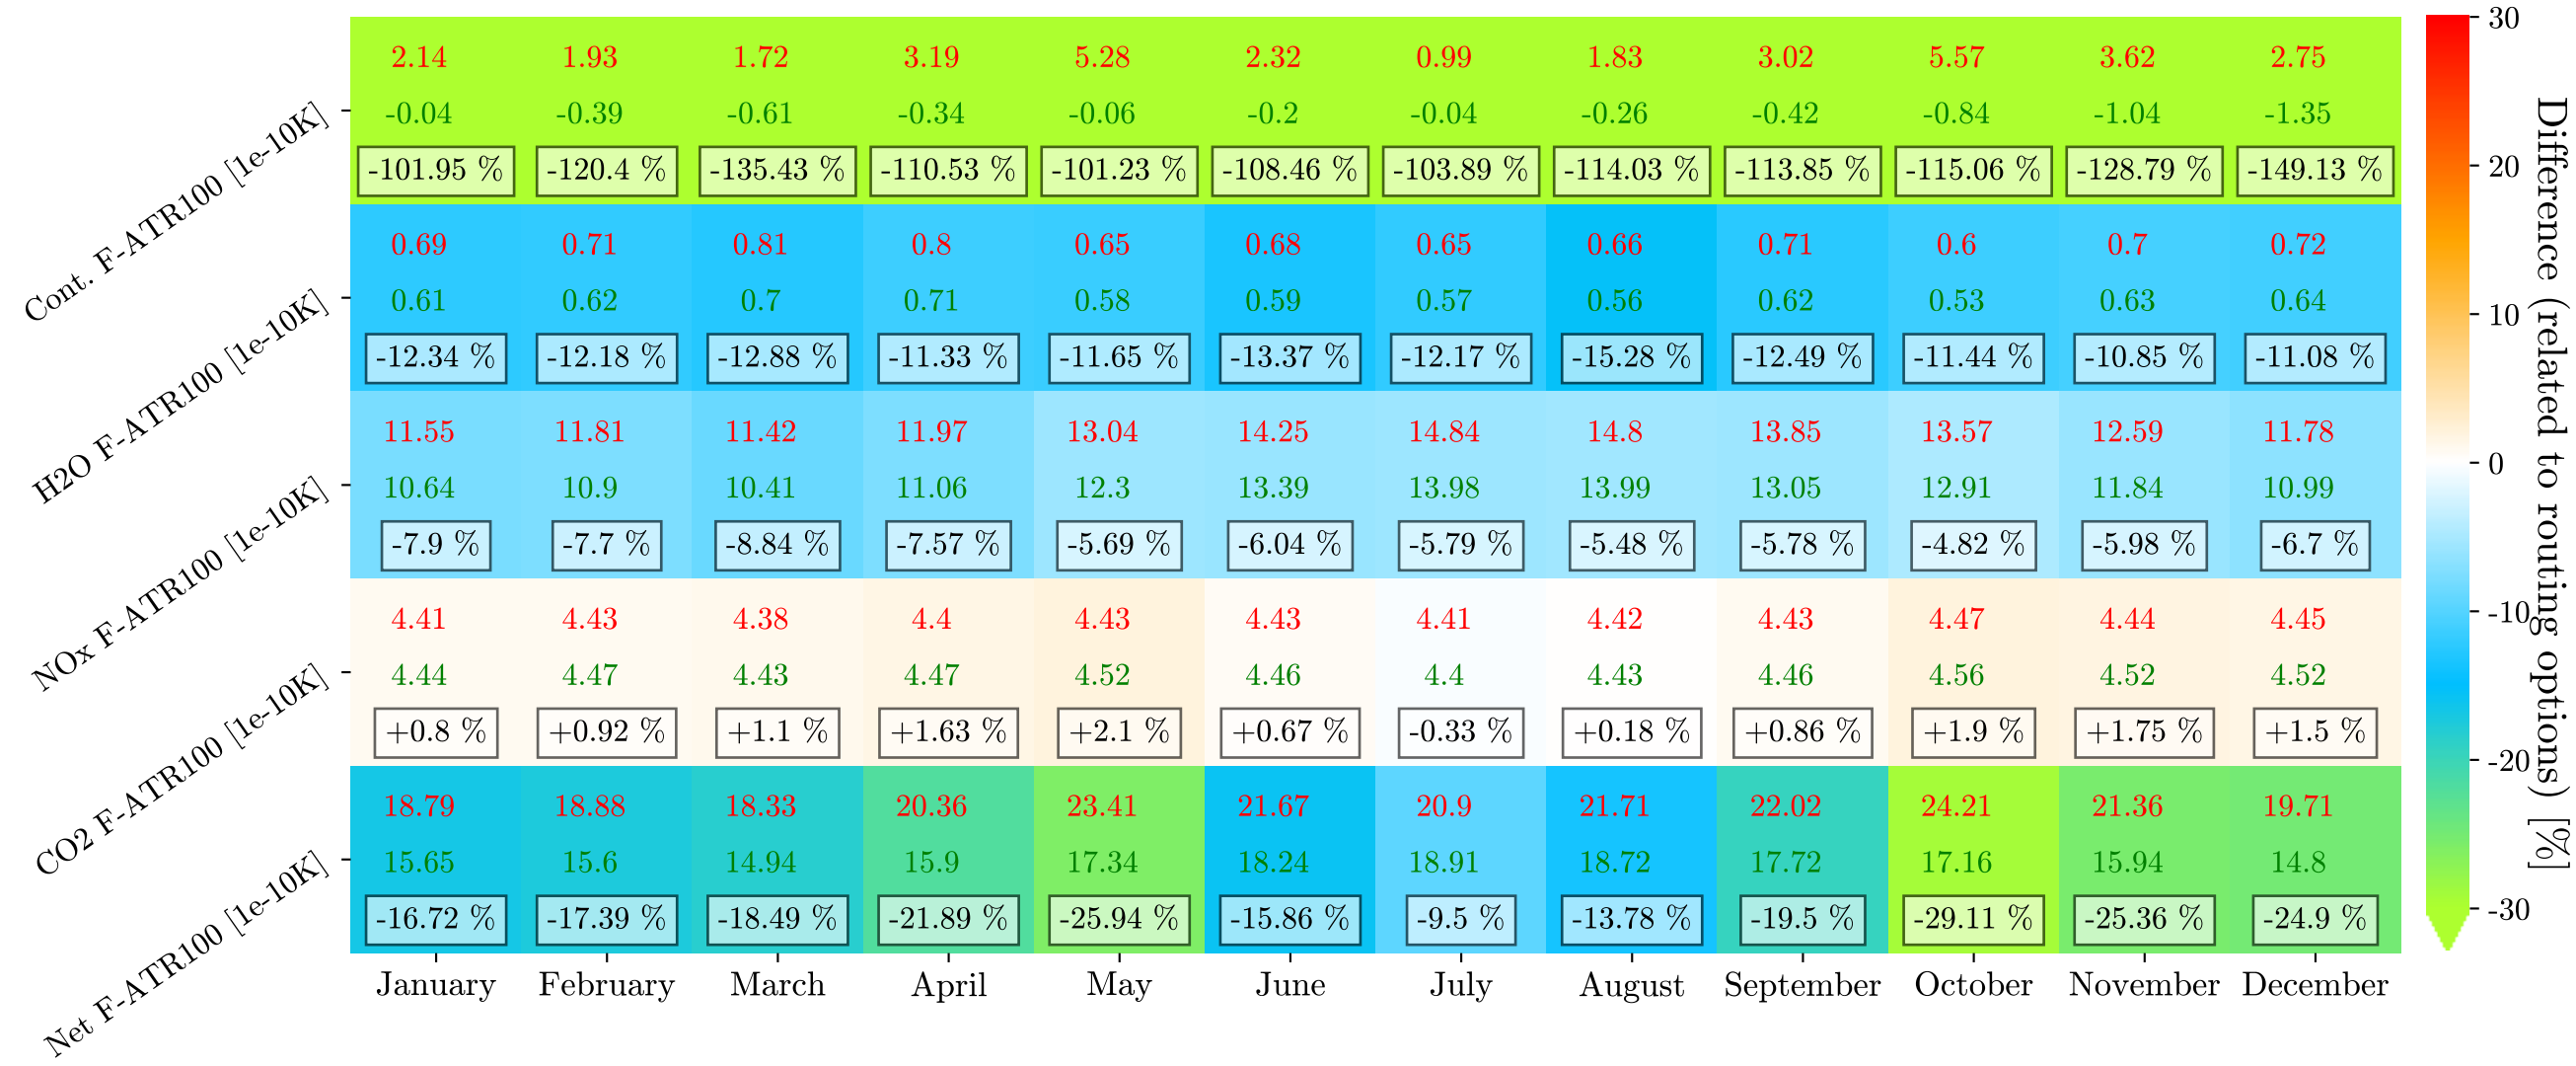

Supplement: Supplementary file 46 [file heat_map_climate_impact_atr100_2.pdf › plots_up_to_3.0%_SOC_unrestricted_rerouting/heat_map_climate_impact_atr100_2.pdf]

Climate Impact over the next 20 years

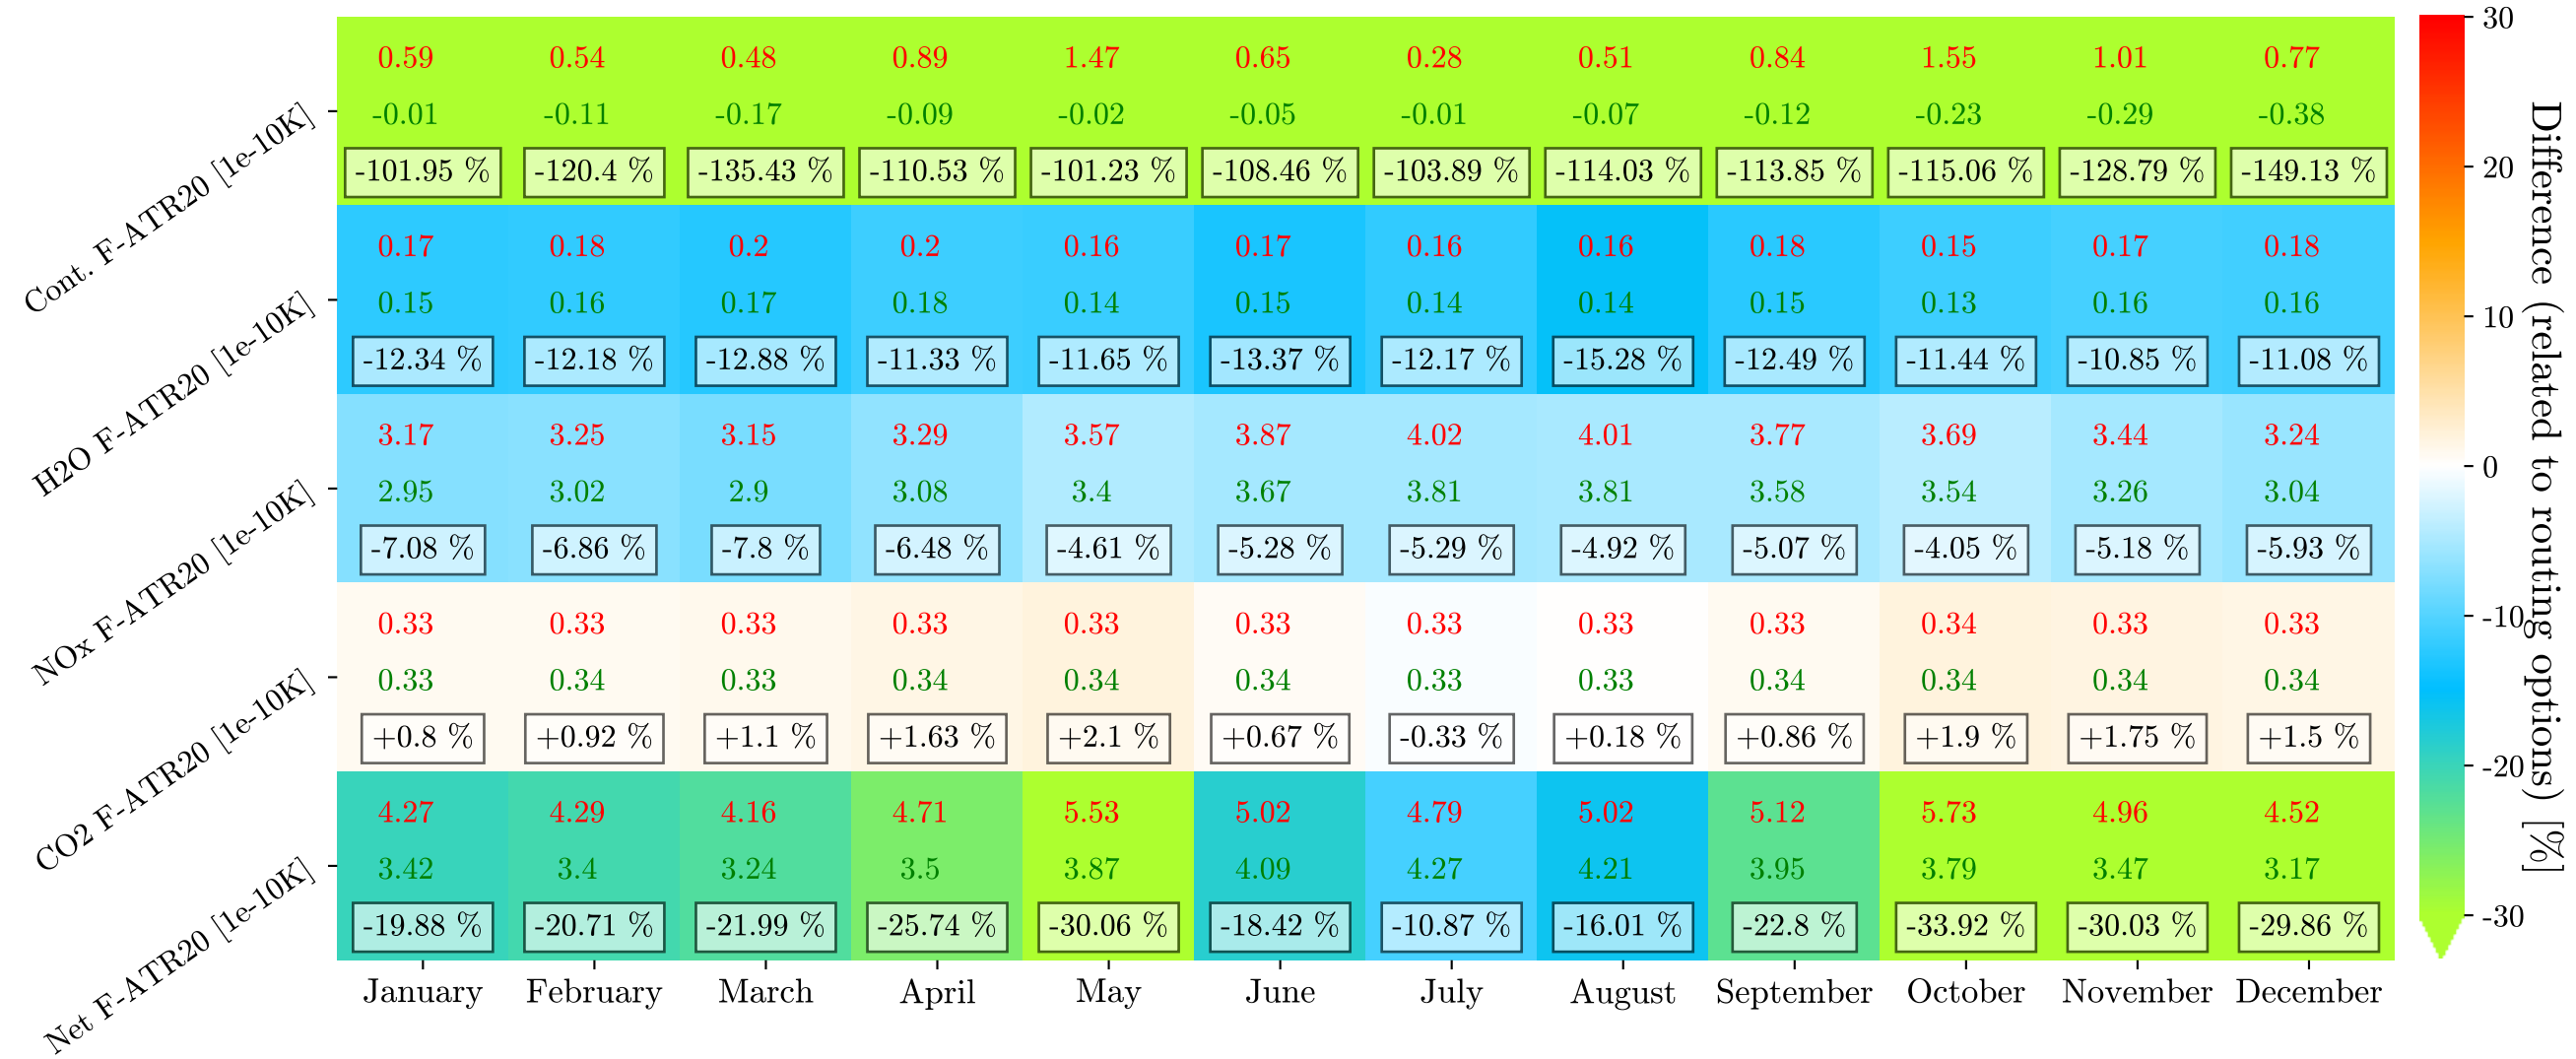

Supplement: Supplementary file 47 [file heat_map_climate_impact_atr20_2.pdf › plots_up_to_3.0%_SOC_unrestricted_rerouting/heat_map_climate_impact_atr20_2.pdf]

Contrail properties

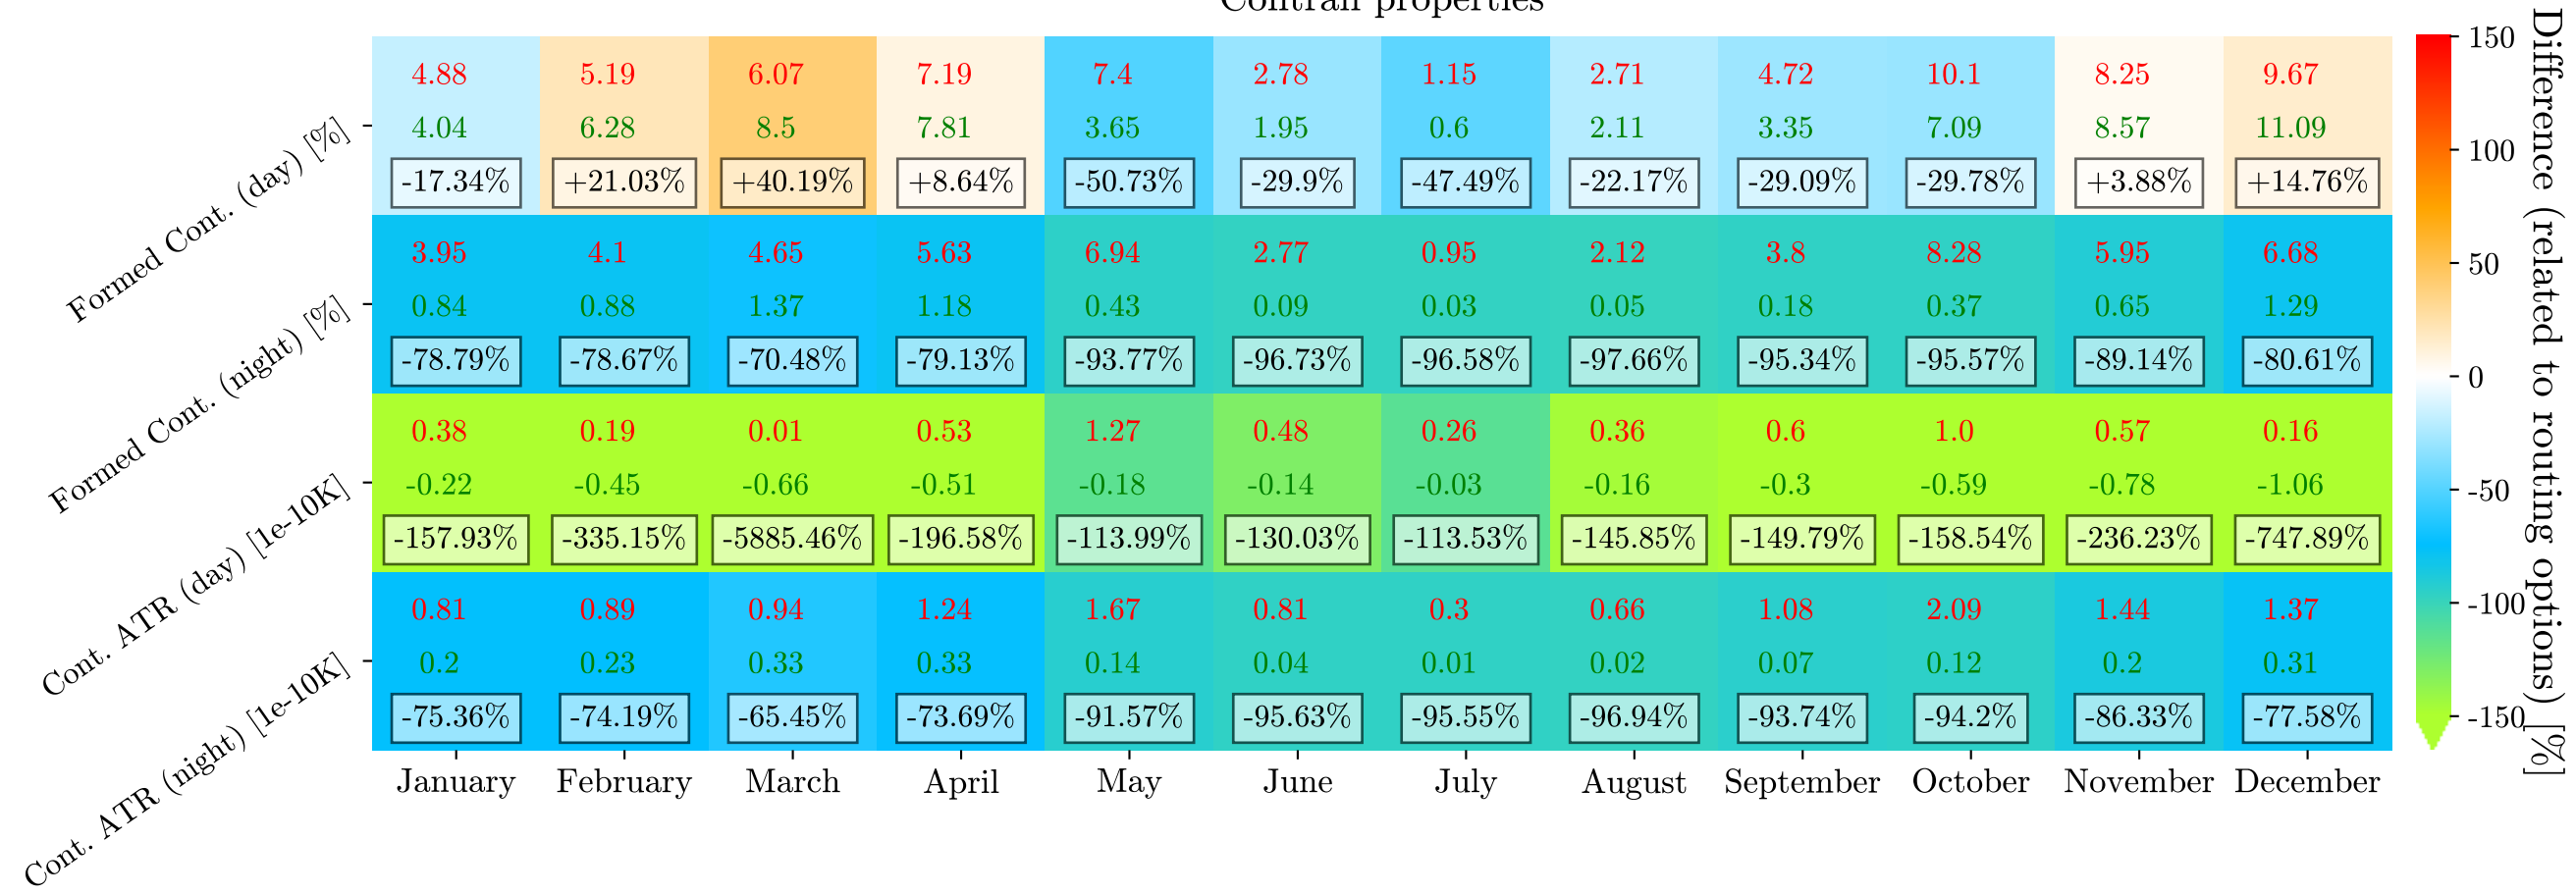

Supplement: Supplementary file 48 [file heat_map_contrails_2.pdf › plots_up_to_3.0%_SOC_unrestricted_rerouting/heat_map_contrails_2.pdf]

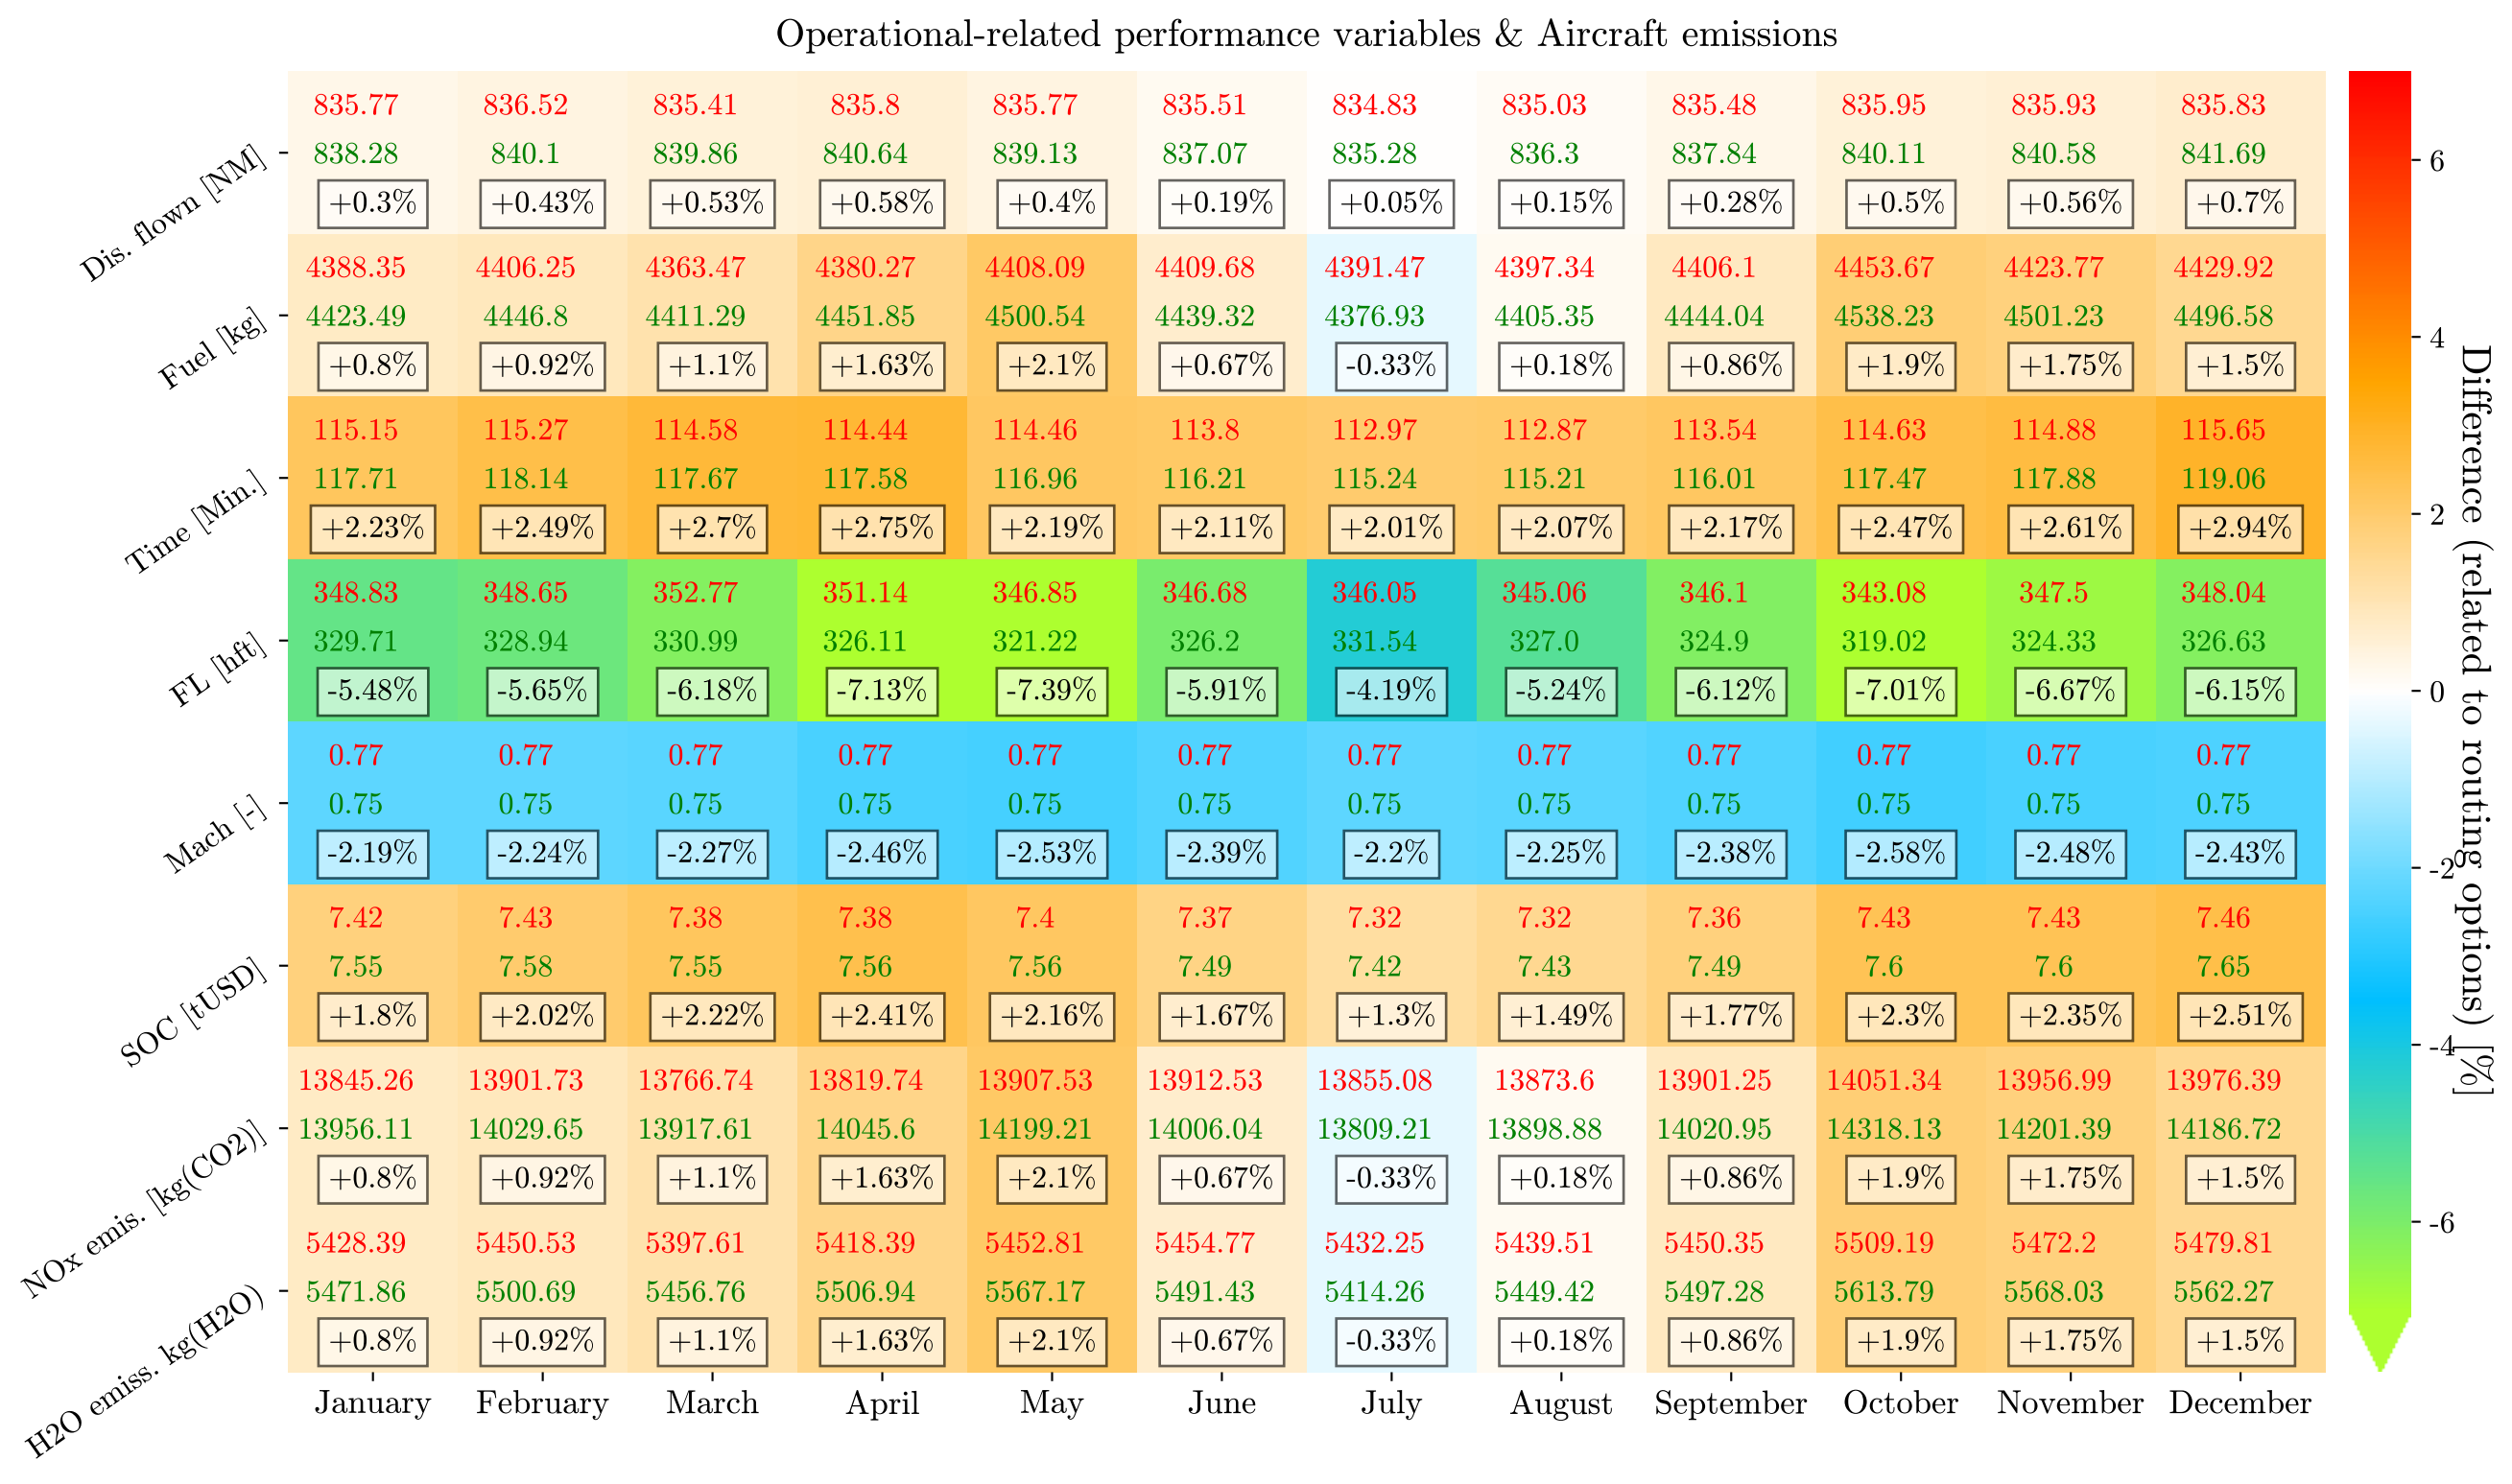

Supplement: Supplementary file 49 [file heat_map_operational_2.pdf › plots_up_to_3.0%_SOC_unrestricted_rerouting/heat_map_operational_2.pdf]

Departure at 0000UTC

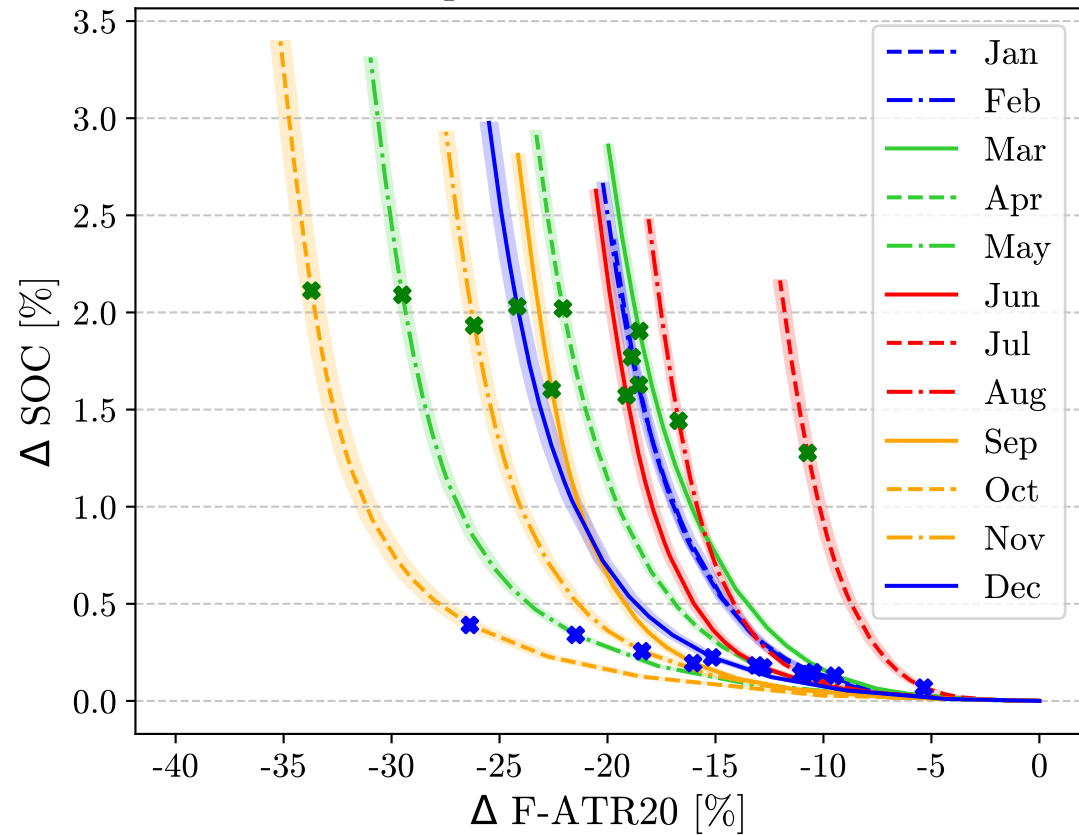

Departure at 1200UTC

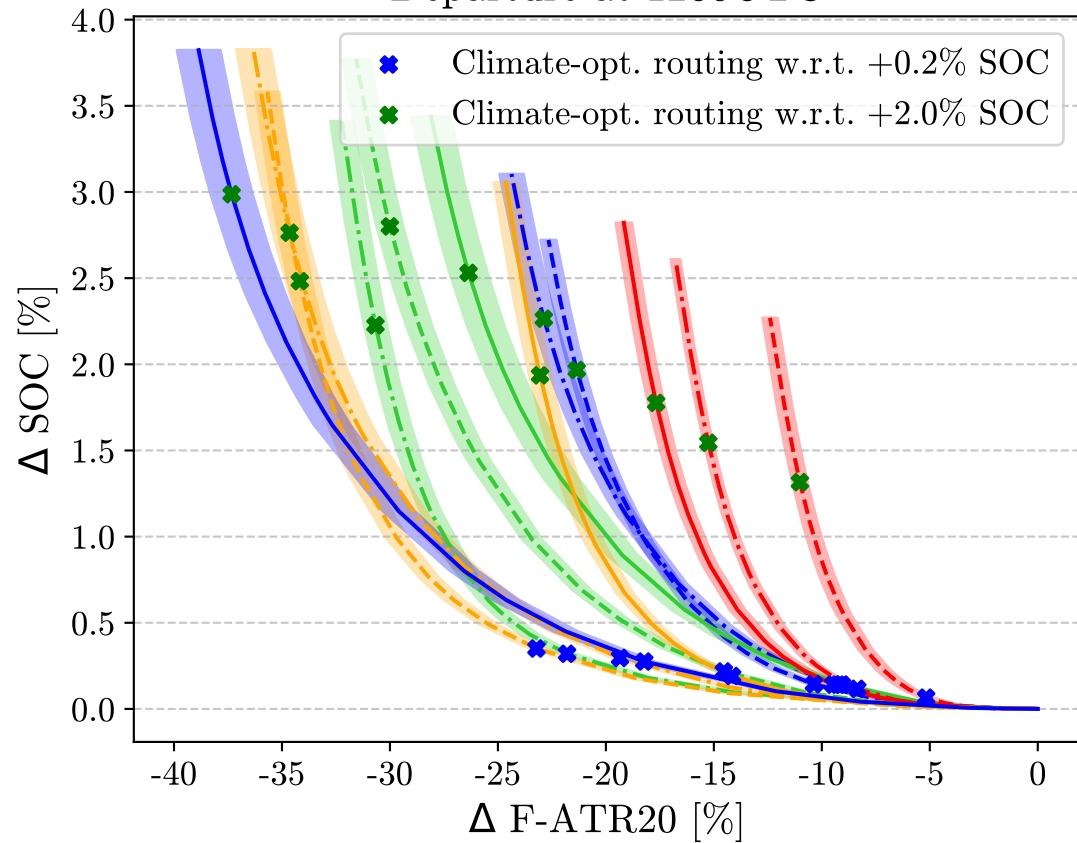

Supplement: Supplementary file 50 [file pareto.pdf › plots_up_to_3.0%_SOC_unrestricted_rerouting/pareto.pdf]

# Climate Impact Mitigation Potential [%]

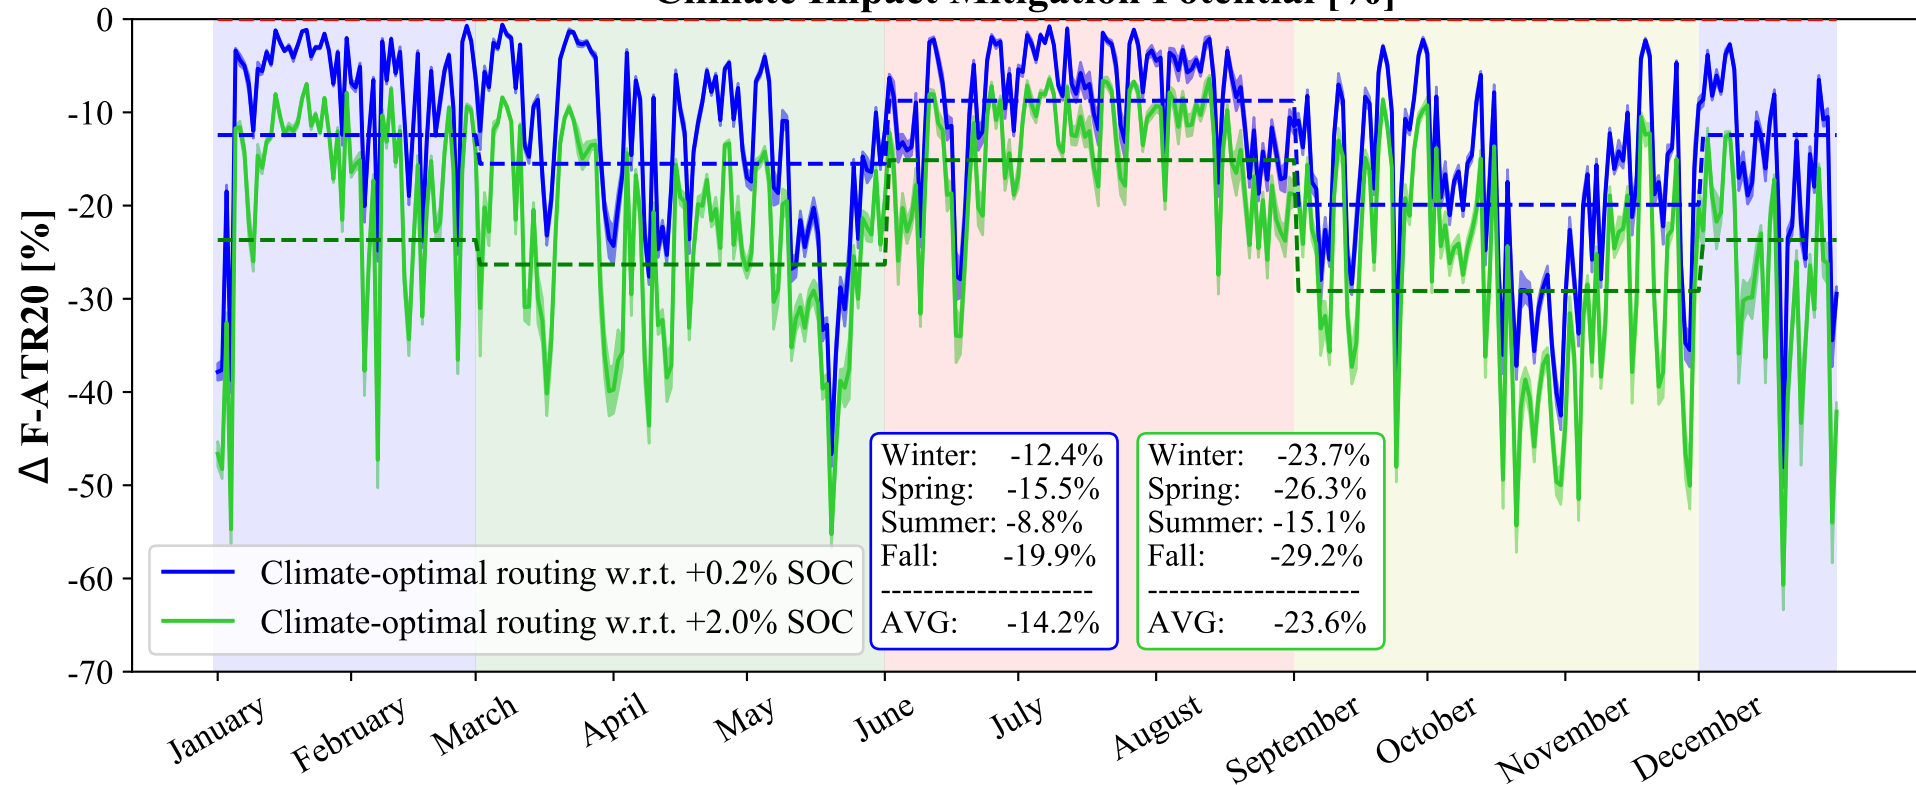

Supplement: Supplementary file 51 [file relative_mitigation_atr_20_2.pdf › plots_up_to_3.0%_SOC_unrestricted_rerouting/relative_mitigation_atr_20_2.pdf]

# Sensitivity Analysis: Relative Humidity Correction

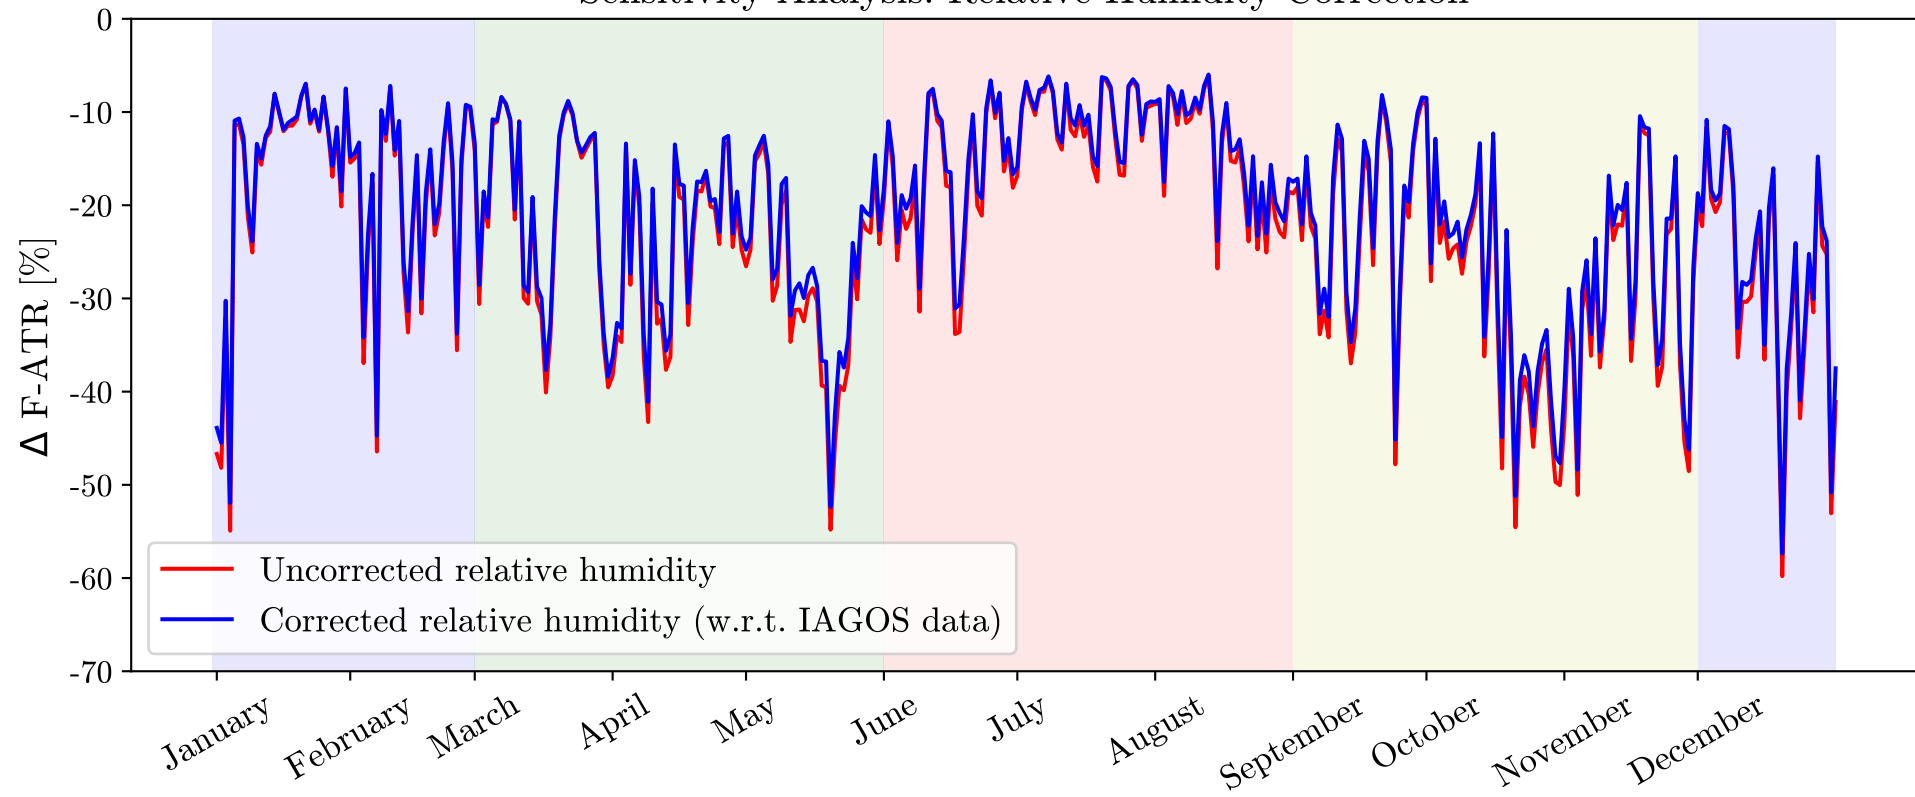

Supplement: Supplementary file 52 [file rl_correction_2.pdf › plots_up_to_3.0%_SOC_unrestricted_rerouting/rl_correction_2.pdf]

**Distribution of mitigation potential over different sets of top routes (+2.0% SOC)**

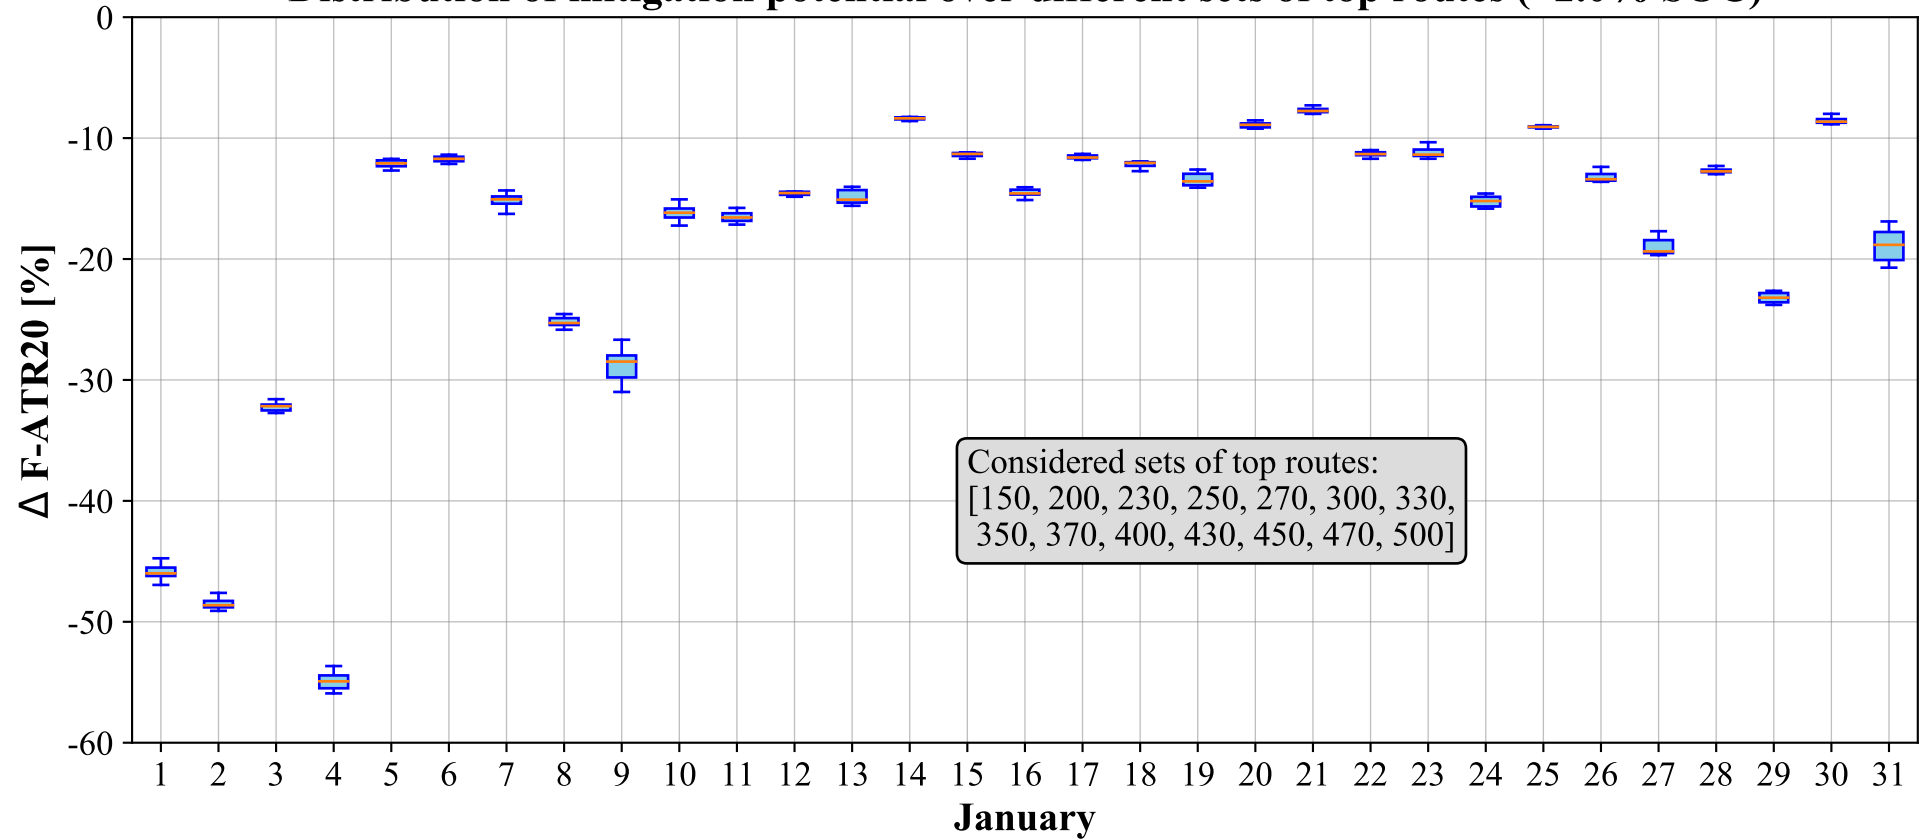

Supplement: Supplementary file 53 [file traffic_scale_up_distribution.pdf › traffic_scenario_sensitivity analysis/traffic_scale_up_distribution.pdf]

**Sensitivity Analysis: Mitigation potential over different sets of top routes (+2.0% SOC)**

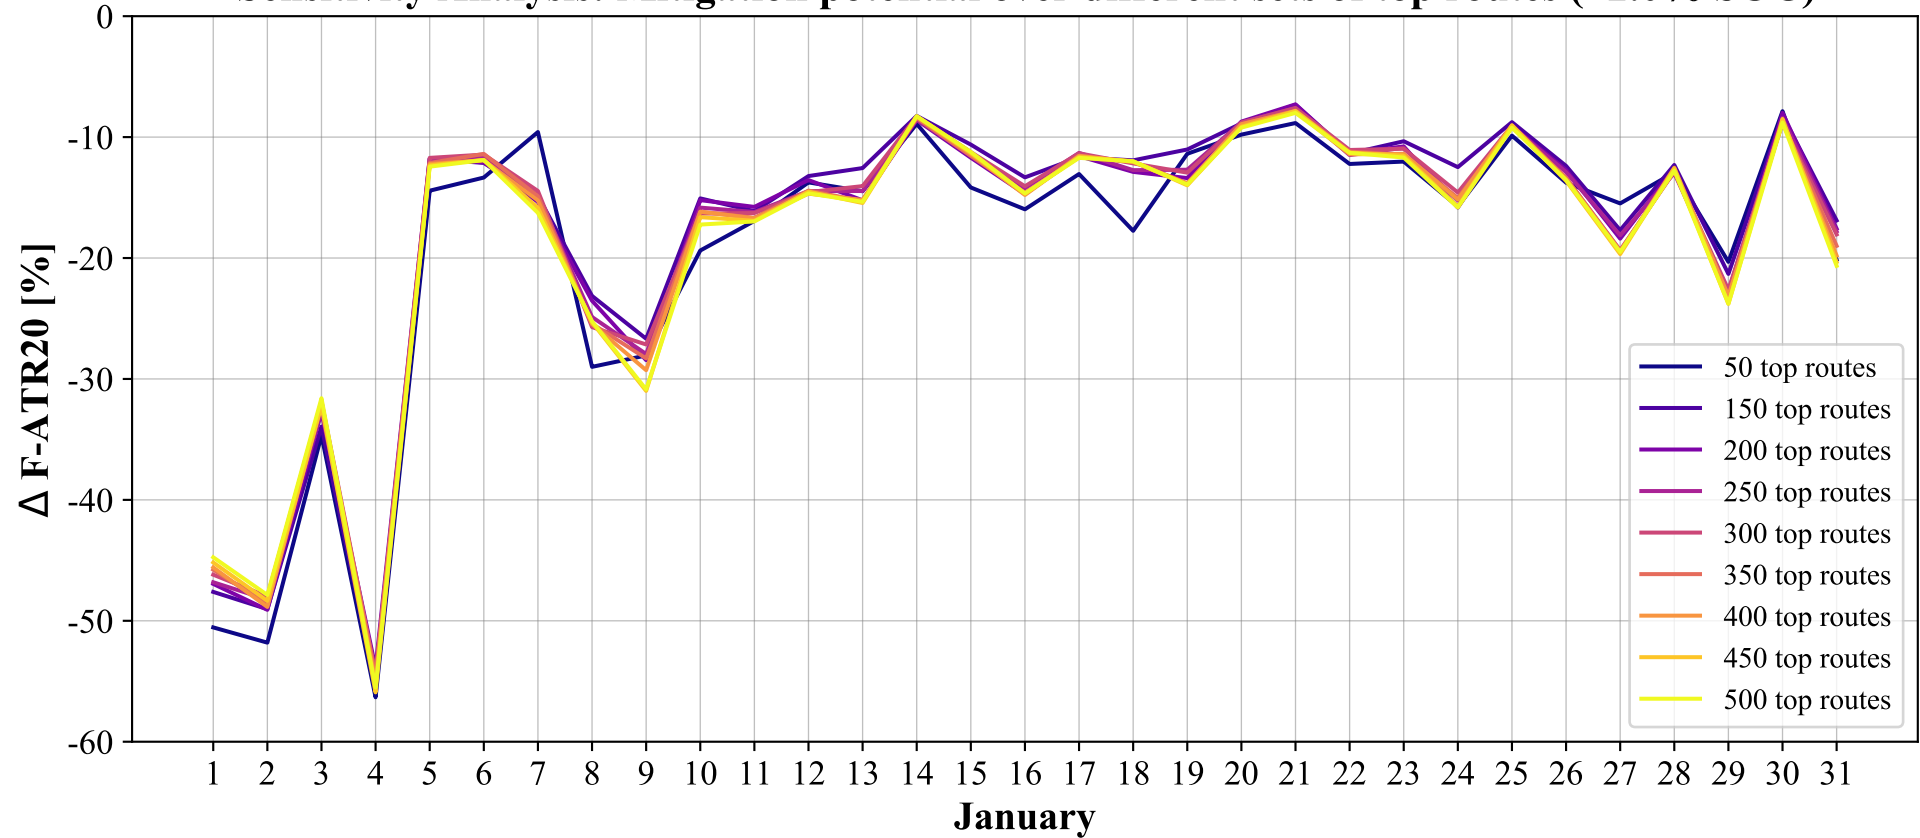

Supplement: Supplementary file 54 [file traffic_scale_up_mitigation.pdf › traffic_scenario_sensitivity analysis/traffic_scale_up_mitigation.pdf]

# Pareto-Frontier (January, 2022)

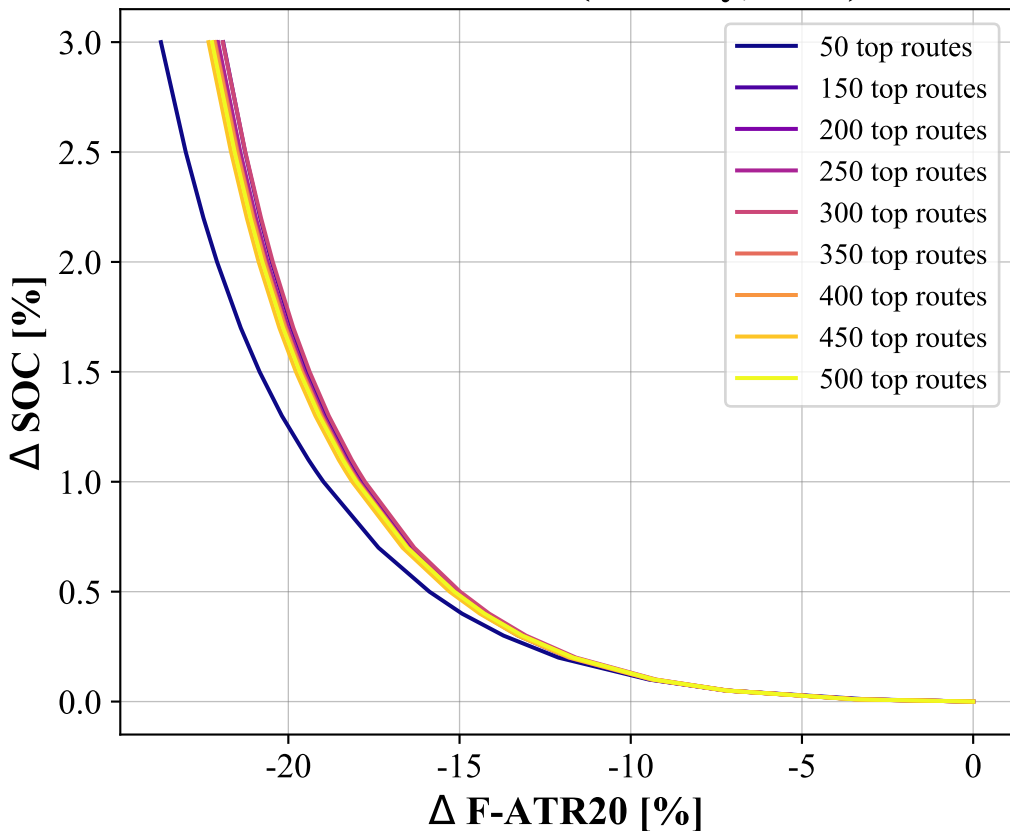

Supplement: Supplementary file 55 [file traffic_scale_up_pareto.pdf › traffic_scenario_sensitivity analysis/traffic_scale_up_pareto.pdf]
